# Supplementary material for: Diversity and community structure of marine microbes around the Benham Rise underwater plateau, northeastern Philippines
Source: PeerJ. 2018 May 16;6:e4781. doi: 10.7717/peerj.4781 (PMC5960264; doi:10.7717/peerj.4781)
Supplement: Supplemental Information 2 [file peerj-06-4781-s002.xls]

## Sheet: Table S2. CTD data
Station	Lon	Lat	MONTH	DAY	YEAR	HOUR	MINUTE	SECOND	PRESSURE	Temperature[degCelsius]	Salinity[psu]	Chl-a[mg/L]	Turbidity[mg/L]	DO[mg/L]	V6	V7	Density00	Depth[m]	Sigma-t00 (degC)
1	124.01	15.944	5	7	2014	16	14	51	4	29.321	34.6444				2.6337	8.4951	1021.71	3.978	29.32
1	124.01	15.944	5	7	2014	16	14	51	6	29.2943	34.6469	0.1978	0.5705		0.0873	0.1621	1021.73	5.965	29.2928
1	124.01	15.944	5	7	2014	16	14	51	8	29.2969	34.6627		0.1392		0.0527	0.0758	1021.75	7.956	29.2949
1	124.01	15.944	5	7	2014	16	14	51	10	29.1508	34.7637		0.1209		0.0521	0.0722	1021.88	9.943	29.1484
1	124.01	15.944	5	7	2014	16	14	51	12	28.3116	35.0265		0.1192		0.0513	0.0718	1022.36	11.933	28.3087
1	124.01	15.944	5	7	2014	16	14	51	14	28.2109	34.7614		0.115		0.0526	0.071	1022.21	13.921	28.2075
1	124.01	15.944	5	7	2014	16	14	51	16	28.1723	34.7752		0.1171		0.0524	0.0714	1022.24	15.91	28.1685
1	124.01	15.944	5	7	2014	16	14	51	18	28.0903	34.7902		0.1204		0.0533	0.0721	1022.28	17.898	28.086
1	124.01	15.944	5	7	2014	16	14	51	20	28.0333	34.806		0.1159		0.053	0.0712	1022.32	19.887	28.0285
1	124.01	15.944	5	7	2014	16	14	51	22	27.9869	34.8294		0.1191		0.0536	0.0718	1022.36	21.876	27.9817
1	124.01	15.944	5	7	2014	16	14	51	24	27.9536	34.8339		0.1209		0.053	0.0722	1022.39	23.864	27.948
1	124.01	15.944	5	7	2014	16	14	51	26	27.9374	34.8377		0.1244		0.0526	0.0729	1022.4	25.853	27.9313
1	124.01	15.944	5	7	2014	16	14	51	28	27.9157	34.838		0.1255		0.0541	0.0731	1022.42	27.841	27.9091
1	124.01	15.944	5	7	2014	16	14	51	30	27.8298	34.8245		0.1227		0.0523	0.0725	1022.45	29.83	27.8228
1	124.01	15.944	5	7	2014	16	14	51	32	27.7619	34.8196		0.1195		0.0528	0.0719	1022.47	31.819	27.7544
1	124.01	15.944	5	7	2014	16	14	51	34	27.6874	34.8146		0.1269		0.0535	0.0734	1022.5	33.807	27.6795
1	124.01	15.944	5	7	2014	16	14	51	36	27.6679	34.8141		0.1284		0.0524	0.0737	1022.52	35.796	27.6595
1	124.01	15.944	5	7	2014	16	14	51	38	27.6643	34.8141		0.1229		0.0539	0.0726	1022.53	37.783	27.6554
1	124.01	15.944	5	7	2014	16	14	51	40	27.6631	34.8143		0.1266		0.0534	0.0733	1022.54	39.772	27.6538
1	124.01	15.944	5	7	2014	16	14	51	42	27.641	34.8149		0.129		0.0535	0.0738	1022.55	41.761	27.6312
1	124.01	15.944	5	7	2014	16	14	51	44	27.5745	34.8171		0.1249		0.0529	0.073	1022.58	43.749	27.5642
1	124.01	15.944	5	7	2014	16	14	51	46	27.4866	34.8248		0.132		0.0534	0.0744	1022.63	45.738	27.4759
1	124.01	15.944	5	7	2014	16	14	51	48	27.4628	34.8345		0.1248		0.0537	0.073	1022.65	47.726	27.4516
1	124.01	15.944	5	7	2014	16	14	51	50	27.4464	34.8386		0.1235		0.0546	0.0727	1022.67	49.714	27.4348
1	124.01	15.944	5	7	2014	16	14	51	52	27.4096	34.836		0.1265		0.0531	0.0733	1022.69	51.703	27.3975
1	124.01	15.944	5	7	2014	16	14	51	54	27.3875	34.8356		0.1353			0.0751	1022.7	53.691	27.375
1	124.01	15.944	5	7	2014	16	14	51	56	27.3589	34.8356		0.122		0.0546	0.0724	1022.72	55.679	27.346
1	124.01	15.944	5	7	2014	16	14	51	58	27.3265	34.836		0.1298		0.0559	0.074	1022.74	57.668	27.3131
1	124.01	15.944	5	7	2014	16	14	51	60	27.3085	34.836	0.0191	0.1278		0.0579	0.0736	1022.75	59.655	27.2946
1	124.01	15.944	5	7	2014	16	14	51	62	27.2663	34.8353	0.0058	0.1333		0.0566	0.0747	1022.77	61.644	27.252
1	124.01	15.944	5	7	2014	16	14	51	64	27.2453	34.8368	0.0046	0.1297		0.0565	0.074	1022.79	63.632	27.2305
1	124.01	15.944	5	7	2014	16	14	51	66	27.24	34.8358	0.0009	0.1315		0.0561	0.0743	1022.8	65.62	27.2247
1	124.01	15.944	5	7	2014	16	14	51	68	27.2088	34.8361	0.0087	0.134		0.0569	0.0748	1022.82	67.609	27.1931
1	124.01	15.944	5	7	2014	16	14	51	70	27.1083	34.8287	0.0157	0.1213		0.0576	0.0722	1022.85	69.596	27.0922
1	124.01	15.944	5	7	2014	16	14	51	72	27.0527	34.8233	0.0139	0.1287		0.0574	0.0737	1022.88	71.584	27.0362
1	124.01	15.944	5	7	2014	16	14	51	74	27.0443	34.8234	0.0185	0.1298		0.0578	0.074	1022.89	73.573	27.0273
1	124.01	15.944	5	7	2014	16	14	51	76	27.0331	34.8217	0.0175	0.1285		0.0578	0.0737	1022.9	75.561	27.0157
1	124.01	15.944	5	7	2014	16	14	51	78	27.0216	34.8197	0.026	0.1304		0.0586	0.0741	1022.91	77.549	27.0037
1	124.01	15.944	5	7	2014	16	14	51	80	26.934	34.8181	0.0261	0.1302		0.0586	0.0741	1022.95	79.537	26.9157
1	124.01	15.944	5	7	2014	16	14	51	82	26.7984	34.8257	0.0299	0.1323		0.059	0.0745	1023	81.525	26.7797
1	124.01	15.944	5	7	2014	16	14	51	84	26.7613	34.8248	0.0322	0.1302		0.0593	0.0741	1023.02	83.513	26.7421
1	124.01	15.944	5	7	2014	16	14	51	86	26.7407	34.8263		0.1316			0.0744	1023.04	85.501	26.7211
1	124.01	15.944	5	7	2014	16	14	51	88	26.7123	34.8291	0.0236	0.1271		0.0584	0.0735	1023.06	87.489	26.6923
1	124.01	15.944	5	7	2014	16	14	51	90	26.6915	34.8307	0.0395	0.1317		0.0599	0.0744	1023.07	89.477	26.671
1	124.01	15.944	5	7	2014	16	14	51	92	26.6781	34.8317	0.0345	0.1258		0.0594	0.0732	1023.09	91.465	26.6572
1	124.01	15.944	5	7	2014	16	14	51	94	26.6484	34.8334	0.0456	0.1275		0.0606	0.0735	1023.11	93.453	26.627
1	124.01	15.944	5	7	2014	16	14	51	96	26.6308	34.8349	0.0416	0.1229		0.0602	0.0726	1023.12	95.44	26.609
1	124.01	15.944	5	7	2014	16	14	51	98	26.6026	34.8379	0.0347	0.123		0.0595	0.0726	1023.14	97.429	26.5804
1	124.01	15.944	5	7	2014	16	14	51	100	26.5883	34.8396	0.0357	0.1251		0.0596	0.0731	1023.16	99.416	26.5657
1	124.01	15.944	5	7	2014	16	14	51	102	26.5791	34.8412	0.0419	0.126		0.0602	0.0732	1023.17	101.405	26.556
1	124.01	15.944	5	7	2014	16	14	51	104	26.5761	34.8421	0.0413	0.127		0.0601	0.0734	1023.18	103.391	26.5525
1	124.01	15.944	5	7	2014	16	14	51	106	26.571	34.8436	0.0371	0.128		0.0597	0.0736	1023.19	105.381	26.547
1	124.01	15.944	5	7	2014	16	14	51	108	26.5413	34.8464	0.0325	0.1214		0.0593	0.0723	1023.21	107.367	26.5169
1	124.01	15.944	5	7	2014	16	14	51	110	26.4636	34.8474	0.0263	0.1282		0.0586	0.0737	1023.25	109.356	26.4388
1	124.01	15.944	5	7	2014	16	14	51	112	26.4274	34.8489	0.0403	0.1284		0.06	0.0737	1023.27	111.343	26.4022
1	124.01	15.944	5	7	2014	16	14	51	114	26.3567	34.8509	0.0593	0.1309		0.062	0.0742	1023.3	113.331	26.331
1	124.01	15.944	5	7	2014	16	14	51	116	26.277	34.8548	0.0768	0.1301		0.0637	0.074	1023.34	115.319	26.2509
1	124.01	15.944	5	7	2014	16	14	51	118	26.2404	34.8571	0.0871	0.1302		0.0647	0.074	1023.36	117.306	26.2139
1	124.01	15.944	5	7	2014	16	14	51	120	26.1766	34.8623	0.1082	0.124		0.0668	0.0728	1023.39	119.294	26.1497
1	124.01	15.944	5	7	2014	16	14	51	122	26.1314	34.8662	0.1164	0.1286		0.0676	0.0737	1023.42	121.281	26.104
1	124.01	15.944	5	7	2014	16	14	51	124	26.0282	34.8737	0.1162	0.1254		0.0676	0.0731	1023.46	123.269	26.0005
1	124.01	15.944	5	7	2014	16	14	51	126	25.8576	34.8863	0.1519	0.1332		0.0712	0.0747	1023.53	125.257	25.8296
1	124.01	15.944	5	7	2014	16	14	51	128	25.755	34.8947	0.1652	0.1223		0.0725	0.0724	1023.58	127.244	25.7266
1	124.01	15.944	5	7	2014	16	14	51	130	25.7085	34.8976	0.172	0.1297		0.0732	0.074	1023.61	129.232	25.6798
1	124.01	15.944	5	7	2014	16	14	51	132	25.5547	34.9034	0.184	0.1213		0.0744	0.0723	1023.67	131.219	25.5256
1	124.01	15.944	5	7	2014	16	14	51	134	25.1389	34.9261	0.2157	0.1227		0.0776	0.0726	1023.82	133.207	25.1097
1	124.01	15.944	5	7	2014	16	14	51	136	24.8885	34.9447	0.2625	0.1066		0.0822	0.0693	1023.92	135.195	24.8591
1	124.01	15.944	5	7	2014	16	14	51	138	24.6044	34.9752	0.291	0.1186		0.0851	0.0717	1024.04	137.182	24.5748
1	124.01	15.944	5	7	2014	16	14	51	140	24.4082	34.9889	0.3036	0.1133		0.0864	0.0706	1024.12	139.17	24.3784
1	124.01	15.944	5	7	2014	16	14	51	142	23.9747	35.0072	0.2861	0.108		0.0846	0.0696	1024.27	141.156	23.9449
1	124.01	15.944	5	7	2014	16	14	51	144	23.7267	35.0028	0.2458	0.1101		0.0806	0.07	1024.35	143.145	23.6966
1	124.01	15.944	5	7	2014	16	14	51	146	23.4568	35.0015	0.2143	0.1106		0.0774	0.0701	1024.43	145.132	23.4266
1	124.01	15.944	5	7	2014	16	14	51	148	23.2913	35.0007	0.1974	0.1062		0.0758	0.0693	1024.49	147.119	23.2609
1	124.01	15.944	5	7	2014	16	14	51	150	23.1301	35.0005	0.1681	0.1152		0.0728	0.071	1024.55	149.106	23.0993
1	124.01	15.944	5	7	2014	16	14	51	152	23.0264	35.0002	0.1495	0.1122		0.0709	0.0704	1024.58	151.094	22.9953
1	124.01	15.944	5	7	2014	16	14	51	154	22.9736	34.9999	0.1555	0.1156		0.0715	0.0711	1024.61	153.081	22.9422
1	124.01	15.944	5	7	2014	16	14	51	156	22.9312	35.0003	0.154	0.1101		0.0714	0.07	1024.63	155.067	22.8994
1	124.01	15.944	5	7	2014	16	14	51	158	22.9074	35	0.1314	0.1141		0.0691	0.0708	1024.64	157.056	22.8753
1	124.01	15.944	5	7	2014	16	14	51	160	22.8808	35.0001	0.1275	0.1081		0.0688	0.0696	1024.66	159.044	22.8482
1	124.01	15.944	5	7	2014	16	14	51	162	22.8563	34.9998	0.1606	0.1213		0.0721	0.0723	1024.68	161.029	22.8234
1	124.01	15.944	5	7	2014	16	14	51	164	22.7624	34.9943	0.138	0.1062		0.0698	0.0692	1024.71	163.017	22.7292
1	124.01	15.944	5	7	2014	16	14	51	166	22.3353	34.9834	0.1114	0.0995		0.0672	0.0679	1024.83	165.006	22.3021
1	124.01	15.944	5	7	2014	16	14	51	168	22.0847	34.9747	0.0739	0.1097		0.0634	0.0699	1024.9	166.991	22.0513
1	124.01	15.944	5	7	2014	16	14	51	170	21.9529	34.9669		0.1108			0.0702	1024.94	168.979	21.9194
1	124.01	15.944	5	7	2014	16	14	51	172	21.7838	34.9624	0.0702	0.1068		0.063	0.0694	1025	170.966	21.75
1	124.01	15.944	5	7	2014	16	14	51	174	21.5212	34.9545	0.0405	0.1097		0.06	0.0699	1025.07	172.953	21.4873
1	124.01	15.944	5	7	2014	16	14	51	176	21.3386	34.946	0.0272	0.1133		0.0587	0.0706	1025.12	174.941	21.3045
1	124.01	15.944	5	7	2014	16	14	51	178	21.2107	34.9399	0.0176	0.1018		0.0578	0.0684	1025.16	176.928	21.1764
1	124.01	15.944	5	7	2014	16	14	51	180	21.0744	34.931	0.0119	0.1023		0.0572	0.0685	1025.2	178.915	21.0399
1	124.01	15.944	5	7	2014	16	14	51	182	20.95	34.9252	0.0014	0.1028		0.0561	0.0686	1025.24	180.902	20.9152
1	124.01	15.944	5	7	2014	16	14	51	184	20.8956	34.9215		0.107		0.056	0.0694	1025.26	182.889	20.8605
1	124.01	15.944	5	7	2014	16	14	51	186	20.7432	34.9132		0.102		0.0554	0.0684	1025.31	184.876	20.7079
1	124.01	15.944	5	7	2014	16	14	51	188	20.6897	34.9109		0.1026		0.0556	0.0685	1025.33	186.863	20.6542
1	124.01	15.944	5	7	2014	16	14	51	190	20.6883	34.912		0.1045		0.0553	0.0689	1025.34	188.85	20.6523
1	124.01	15.944	5	7	2014	16	14	51	192	20.6903	34.9129		0.1039		0.0539	0.0688	1025.35	190.838	20.6539
1	124.01	15.944	5	7	2014	16	14	51	194	20.661	34.914		0.0984		0.0544	0.0677	1025.36	192.824	20.6243
1	124.01	15.944	5	7	2014	16	14	51	196	20.5472	34.9116		0.1085		0.0542	0.0697	1025.4	194.811	20.5102
1	124.01	15.944	5	7	2014	16	14	51	198	20.4982	34.9084		0.1018		0.0541	0.0684	1025.42	196.797	20.4609
1	124.01	15.944	5	7	2014	16	14	51	200	20.1364	34.8821		0.1055		0.0528	0.0691	1025.51	198.785	20.0992
1	124.01	15.944	5	7	2014	16	14	51	202	19.799	34.8566		0.1032		0.051	0.0686	1025.59	200.772	19.762
1	124.01	15.944	5	7	2014	16	14	51	204	19.6581	34.8499		0.1217		0.051	0.0723	1025.63	202.758	19.6208
1	124.01	15.944	5	7	2014	16	14	51	206	19.5682	34.8456		0.1104		0.0503	0.0701	1025.66	204.744	19.5307
1	124.01	15.944	5	7	2014	16	14	51	208	19.5512	34.8458		0.0932		0.0499	0.0666	1025.67	206.733	19.5134
1	124.01	15.944	5	7	2014	16	14	51	210	19.5492	34.8459		0.0987		0.0503	0.0677	1025.68	208.72	19.511
1	124.01	15.944	5	7	2014	16	14	51	212	19.4168	34.8337		0.1124		0.0515	0.0705	1025.71	210.704	19.3784
1	124.01	15.944	5	7	2014	16	14	51	214	19.2527	34.821		0.1076		0.0524	0.0695	1025.75	212.692	19.2142
1	124.01	15.944	5	7	2014	16	14	51	216	19.1431	34.8189		0.0964		0.0493	0.0673	1025.79	214.68	19.1044
1	124.01	15.944	5	7	2014	16	14	51	218	18.9485	34.8086		0.0995		0.0504	0.0679	1025.84	216.666	18.9097
1	124.01	15.944	5	7	2014	16	14	51	220	18.723	34.7975		0.1026		0.048	0.0685	1025.9	218.652	18.6842
1	124.01	15.944	5	7	2014	16	14	51	222	18.6659	34.7954		0.1		0.0496	0.068	1025.92	220.638	18.6268
1	124.01	15.944	5	7	2014	16	14	51	224	18.5898	34.7927		0.0934		0.0504	0.0665	1025.95	222.627	18.5505
1	124.01	15.944	5	7	2014	16	14	51	226	18.553	34.7908				0.048		1025.96	224.612	18.5134
1	124.01	15.944	5	7	2014	16	14	51	228	18.5418	34.7907				0.0495		1025.98	226.6	18.5019
1	124.01	15.944	5	7	2014	16	14	51	230	18.5209	34.7901		0.1019		0.0496	0.0684	1025.99	228.585	18.4807
1	124.01	15.944	5	7	2014	16	14	51	232	18.4843	34.7878		0.0951		0.0488	0.067	1026.01	230.572	18.4438
1	124.01	15.944	5	7	2014	16	14	51	234	18.4387	34.7846		0.0991		0.0485	0.0678	1026.02	232.559	18.3979
1	124.01	15.944	5	7	2014	16	14	51	236	18.3962	34.7836		0.0935		0.0482	0.0667	1026.04	234.547	18.3551
1	124.01	15.944	5	7	2014	16	14	51	238	18.3871	34.7841		0.1129		0.0487	0.0706	1026.05	236.53	18.3456
1	124.01	15.944	5	7	2014	16	14	51	240	18.359	34.7825		0.0981		0.0497	0.0677	1026.07	238.518	18.3172
1	124.01	15.944	5	7	2014	16	14	51	242	18.2825	34.7768		0.0998		0.0488	0.068	1026.09	240.506	18.2405
1	124.01	15.944	5	7	2014	16	14	51	244	18.1202	34.7658		0.1047		0.05	0.0689	1026.13	242.491	18.0781
1	124.01	15.944	5	7	2014	16	14	51	246	18.0493	34.7631		0.1		0.0495	0.068	1026.16	244.478	18.0069
1	124.01	15.944	5	7	2014	16	14	51	248	18.02	34.7602		0.102		0.0488	0.0684	1026.17	246.464	17.9774
1	124.01	15.944	5	7	2014	16	14	51	250	17.9956	34.7579		0.0935			0.0667	1026.18	248.452	17.9527
1	124.01	15.944	5	7	2014	16	14	51	252	17.9796	34.7567		0.1079		0.0483	0.0696	1026.2	250.437	17.9364
1	124.01	15.944	5	7	2014	16	14	51	254	17.9094	34.7504		0.0991		0.0493	0.0679	1026.22	252.424	17.8659
1	124.01	15.944	5	7	2014	16	14	51	256	17.764	34.7426		0.0987		0.0475	0.0678	1026.26	254.41	17.7205
1	124.01	15.944	5	7	2014	16	14	51	258	17.6921	34.7392		0.0965		0.0487	0.0673	1026.28	256.397	17.6483
1	124.01	15.944	5	7	2014	16	14	51	260	17.6722	34.739		0.1059		0.0489	0.0692	1026.29	258.382	17.6281
1	124.01	15.944	5	7	2014	16	14	51	262	17.6343	34.7365		0.1081		0.0481	0.0696	1026.31	260.368	17.59
1	124.01	15.944	5	7	2014	16	14	51	264	17.5372	34.7317		0.0964		0.0494	0.0673	1026.34	262.356	17.4927
1	124.01	15.944	5	7	2014	16	14	51	266	17.4534	34.7255		0.0983		0.0483	0.0677	1026.36	264.342	17.4087
1	124.01	15.944	5	7	2014	16	14	51	268	17.3626	34.7152		0.1021		0.0503	0.0684	1026.39	266.327	17.3177
1	124.01	15.944	5	7	2014	16	14	51	270	17.2753	34.7087		0.0997		0.0493	0.068	1026.41	268.315	17.2303
1	124.01	15.944	5	7	2014	16	14	51	272	17.2641	34.7083		0.1005		0.0478	0.0681	1026.42	270.299	17.2187
1	124.01	15.944	5	7	2014	16	14	51	274	17.2619	34.7085		0.0884		0.0482	0.0657	1026.43	272.287	17.2163
1	124.01	15.944	5	7	2014	16	14	51	276	17.2598	34.7085		0.0923		0.0491	0.0665	1026.44	274.272	17.2137
1	124.01	15.944	5	7	2014	16	14	51	278	17.2506	34.7076		0.094		0.0481	0.0668	1026.45	276.259	17.2042
1	124.01	15.944	5	7	2014	16	14	51	280	17.1634	34.7002		0.1		0.0474	0.068	1026.48	278.244	17.1169
1	124.01	15.944	5	7	2014	16	14	51	282	17.0279	34.6905		0.0916		0.0482	0.0663	1026.51	280.231	16.9813
1	124.01	15.944	5	7	2014	16	14	51	284	16.9239	34.6833		0.102		0.0489	0.0684	1026.54	282.217	16.8771
1	124.01	15.944	5	7	2014	16	14	51	286	16.7885	34.6724		0.1019		0.0483	0.0684	1026.57	284.203	16.7418
1	124.01	15.944	5	7	2014	16	14	51	288	16.6462	34.6648		0.0986		0.0485	0.0678	1026.61	286.189	16.5994
1	124.01	15.944	5	7	2014	16	14	51	290	16.6232	34.6628		0.0951		0.0492	0.067	1026.62	288.176	16.5761
1	124.01	15.944	5	7	2014	16	14	51	292	16.569	34.6584		0.1049		0.048	0.069	1026.64	290.16	16.5217
1	124.01	15.944	5	7	2014	16	14	51	294	16.5257	34.6553		0.101		0.0493	0.0682	1026.66	292.148	16.4781
1	124.01	15.944	5	7	2014	16	14	51	296	16.5015	34.6539		0.1033		0.0487	0.0686	1026.67	294.132	16.4537
1	124.01	15.944	5	7	2014	16	14	51	298	16.4329	34.6477		0.0932		0.0476	0.0666	1026.69	296.12	16.3849
1	124.01	15.944	5	7	2014	16	14	51	300	16.355	34.6426		0.099		0.0492	0.0678	1026.71	298.105	16.3068
1	124.01	15.944	5	7	2014	16	14	51	302	16.284	34.6375		0.0985		0.0515	0.0677	1026.73	300.09	16.2356
1	124.01	15.944	5	7	2014	16	14	51	304	16.1631	34.6277		0.096		0.0486	0.0672	1026.76	302.077	16.1146
1	124.01	15.944	5	7	2014	16	14	51	306	15.975	34.6133		0.0901		0.0484	0.066	1026.81	304.063	15.9266
1	124.01	15.944	5	7	2014	16	14	51	308	15.7886	34.5998		0.0966		0.0496	0.0673	1026.85	306.048	15.7402
1	124.01	15.944	5	7	2014	16	14	51	310	15.7216	34.5946		0.0987		0.0482	0.0678	1026.87	308.035	15.6731
1	124.01	15.944	5	7	2014	16	14	51	312	15.6817	34.592		0.0911		0.0482	0.0662	1026.88	310.02	15.633
1	124.01	15.944	5	7	2014	16	14	51	314	15.5714	34.5839		0.0954		0.048	0.0671	1026.91	312.006	15.5226
1	124.01	15.944	5	7	2014	16	14	51	316	15.4122	34.5721		0.0981		0.0488	0.0677	1026.95	313.992	15.3635
1	124.01	15.944	5	7	2014	16	14	51	318	15.3185	34.5652		0.0939		0.0476	0.0668	1026.97	315.978	15.2697
1	124.01	15.944	5	7	2014	16	14	51	320	15.2417	34.5595		0.1042		0.0493	0.0689	1026.99	317.963	15.1927
1	124.01	15.944	5	7	2014	16	14	51	322	15.0862	34.5491		0.0974		0.0478	0.0675	1027.03	319.949	15.0372
1	124.01	15.944	5	7	2014	16	14	51	324	14.9595	34.5391		0.0989		0.0492	0.0678	1027.06	321.935	14.9105
1	124.01	15.944	5	7	2014	16	14	51	326	14.8855	34.5341		0.0977		0.0486	0.0676	1027.08	323.921	14.8364
1	124.01	15.944	5	7	2014	16	14	51	328	14.793	34.5273		0.1045		0.0491	0.0689	1027.11	325.906	14.7438
1	124.01	15.944	5	7	2014	16	14	51	330	14.7531	34.5267		0.1019		0.0494	0.0684	1027.12	327.891	14.7036
1	124.01	15.944	5	7	2014	16	14	51	332	14.7177	34.5261		0.0941		0.0497	0.0668	1027.14	329.879	14.6681
1	124.01	15.944	5	7	2014	16	14	51	334	14.6148	34.5198		0.0966		0.0494	0.0673	1027.17	331.862	14.565
1	124.01	15.944	5	7	2014	16	14	51	336	14.5649	34.5159		0.1045		0.049	0.0689	1027.18	333.848	14.515
1	124.01	15.944	5	7	2014	16	14	51	338	14.4719	34.5081		0.0945		0.0481	0.0669	1027.21	335.835	14.4219
1	124.01	15.944	5	7	2014	16	14	51	340	14.2859	34.4941		0.0971		0.0497	0.0674	1027.24	337.82	14.2361
1	124.01	15.944	5	7	2014	16	14	51	342	14.0982	34.4796		0.0932		0.0489	0.0667	1027.28	339.805	14.0485
1	124.01	15.944	5	7	2014	16	14	51	344	13.9551	34.4704		0.1073		0.0494	0.0695	1027.32	341.791	13.9055
1	124.01	15.944	5	7	2014	16	14	51	346	13.9028	34.4683		0.0076		0.0493	0.0701	1027.33	343.777	13.853
1	124.01	15.944	5	7	2014	16	14	51	348	13.8817	34.4668		-0.0119		0.0478	0.0679	1027.35	345.766	13.8316
2	124.21	15.874	5	7	2014	20	12	42	4	29.3111	34.4748		0.0562		0.0464	0.0713	1021.58	3.975	29.3102
2	124.21	15.874	5	7	2014	20	12	42	6	29.3122	34.542		0.0939		0.0524	0.0711	1021.64	5.966	29.3108
2	124.21	15.874	5	7	2014	20	12	42	8	29.3132	34.5457		0.1096		0.0513	0.0698	1021.65	7.955	29.3112
2	124.21	15.874	5	7	2014	20	12	42	10	29.3163	34.5457		0.1193		0.0525	0.0719	1021.66	9.943	29.3139
2	124.21	15.874	5	7	2014	20	12	42	12	29.3132	34.546		0.1191		0.0518	0.0718	1021.67	11.933	29.3103
2	124.21	15.874	5	7	2014	20	12	42	14	29.3137	34.5478		0.1139		0.0522	0.0708	1021.68	13.921	29.3103
2	124.21	15.874	5	7	2014	20	12	42	16	29.3088	34.5515		0.1141		0.0515	0.0708	1021.69	15.91	29.3049
2	124.21	15.874	5	7	2014	20	12	42	18	29.2892	34.5603		0.1217		0.0512	0.0723	1021.71	17.898	29.2849
2	124.21	15.874	5	7	2014	20	12	42	20	29.2682	34.5692		0.1162		0.0509	0.0712	1021.74	19.888	29.2633
2	124.21	15.874	5	7	2014	20	12	42	22	29.2255	34.5844		0.1232		0.051	0.0726	1021.77	21.876	29.2202
2	124.21	15.874	5	7	2014	20	12	42	24	29.1345	34.6126		0.1163		0.0521	0.0713	1021.83	23.864	29.1287
2	124.21	15.874	5	7	2014	20	12	42	26	29.0342	34.6505		0.113		0.0519	0.0706	1021.9	25.854	29.0279
2	124.21	15.874	5	7	2014	20	12	42	28	28.7375	34.7384		0.1154		0.052	0.071	1022.07	27.841	28.7308
2	124.21	15.874	5	7	2014	20	12	42	30	28.5006	34.7699		0.1201		0.0525	0.072	1022.19	29.83	28.4934
2	124.21	15.874	5	7	2014	20	12	42	32	28.2831	34.8067		0.1197		0.0526	0.0719	1022.29	31.817	28.2755
2	124.21	15.874	5	7	2014	20	12	42	34	28.188	34.8254		0.1002		0.0518	0.068	1022.35	33.809	28.1799
2	124.21	15.874	5	7	2014	20	12	42	36	28.1091	34.8357		0.1118		0.0529	0.0704	1022.39	35.795	28.1006
2	124.21	15.874	5	7	2014	20	12	42	38	28.0679	34.8422		0.1203		0.0531	0.072	1022.42	37.783	28.059
2	124.21	15.874	5	7	2014	20	12	42	40	28.037	34.8449		0.1095		0.0531	0.0699	1022.44	39.774	28.0276
2	124.21	15.874	5	7	2014	20	12	42	42	27.9739	34.8537		0.1255		0.0536	0.0731	1022.47	41.76	27.964
2	124.21	15.874	5	7	2014	20	12	42	44	27.9539	34.8583		0.1175		0.0542	0.0715	1022.49	43.749	27.9435
2	124.21	15.874	5	7	2014	20	12	42	46	27.9406	34.8602		0.1177		0.0531	0.0715	1022.51	45.738	27.9298
2	124.21	15.874	5	7	2014	20	12	42	48	27.9211	34.8622		0.1174		0.0551	0.0715	1022.52	47.726	27.9098
2	124.21	15.874	5	7	2014	20	12	42	50	27.8994	34.8651		0.1214		0.0536	0.0723	1022.54	49.714	27.8876
2	124.21	15.874	5	7	2014	20	12	42	52	27.8849	34.8662		0.1118		0.0537	0.0704	1022.55	51.703	27.8727
2	124.21	15.874	5	7	2014	20	12	42	54	27.8584	34.8666		0.1191		0.0535	0.0718	1022.57	53.691	27.8458
2	124.21	15.874	5	7	2014	20	12	42	56	27.8352	34.8677		0.124		0.0533	0.0728	1022.59	55.68	27.8221
2	124.21	15.874	5	7	2014	20	12	42	58	27.8051	34.8679		0.1242		0.0544	0.0729	1022.61	57.667	27.7915
2	124.21	15.874	5	7	2014	20	12	42	60	27.7742	34.8687		0.1225		0.0547	0.0725	1022.63	59.655	27.7602
2	124.21	15.874	5	7	2014	20	12	42	62	27.762	34.8686		0.1221		0.0532	0.0724	1022.64	61.645	27.7475
2	124.21	15.874	5	7	2014	20	12	42	64	27.7286	34.8681		0.1211		0.0556	0.0722	1022.66	63.632	27.7137
2	124.21	15.874	5	7	2014	20	12	42	66	27.6453	34.8652		0.1137		0.0544	0.0707	1022.69	65.619	27.6299
2	124.21	15.874	5	7	2014	20	12	42	68	27.5746	34.8628		0.1108		0.0554	0.0701	1022.72	67.608	27.5588
2	124.21	15.874	5	7	2014	20	12	42	70	27.5332	34.8604		0.0815		0.0537	0.0719	1022.74	69.599	27.5169
2	124.21	15.874	5	7	2014	20	12	42	72	27.4744	34.8592		-0.3752		0.0531	0.0707	1022.77	71.58	27.4577
2	124.21	15.874	5	7	2014	20	12	42	74	27.4219	34.858		0.1159		0.0544	0.0704	1022.79	73.572	27.4048
2	124.21	15.874	5	7	2014	20	12	42	76	27.2923	34.8556		0.1206		0.0536	0.0721	1022.84	75.562	27.2747
2	124.21	15.874	5	7	2014	20	12	42	78	27.2614	34.8604		0.1268		0.0536	0.0734	1022.86	77.548	27.2434
2	124.21	15.874	5	7	2014	20	12	42	80	27.2494	34.8618		0.1155		0.0542	0.0711	1022.88	79.537	27.2309
2	124.21	15.874	5	7	2014	20	12	42	82	27.2265	34.8622		0.1182		0.0548	0.0716	1022.89	81.525	27.2076
2	124.21	15.874	5	7	2014	20	12	42	84	27.218	34.8625		0.1285			0.0737	1022.9	83.512	27.1987
2	124.21	15.874	5	7	2014	20	12	42	86	27.2079	34.8626		0.1238		0.0549	0.0728	1022.92	85.501	27.188
2	124.21	15.874	5	7	2014	20	12	42	88	27.1774	34.8625		0.1238		0.0546	0.0728	1022.93	87.489	27.1572
2	124.21	15.874	5	7	2014	20	12	42	90	27.1253	34.8628	0.001	0.1228		0.0561	0.0726	1022.96	89.476	27.1046
2	124.21	15.874	5	7	2014	20	12	42	92	27.0685	34.8638	0.0072	0.1235		0.0567	0.0727	1022.99	91.466	27.0473
2	124.21	15.874	5	7	2014	20	12	42	94	26.9561	34.8668		0.1178		0.0559	0.0715	1023.03	93.452	26.9346
2	124.21	15.874	5	7	2014	20	12	42	96	26.8782	34.8689		0.1215		0.0558	0.0723	1023.07	95.441	26.8563
2	124.21	15.874	5	7	2014	20	12	42	98	26.8188	34.8715	0.0106	0.1268		0.0572	0.0734	1023.1	97.429	26.7964
2	124.21	15.874	5	7	2014	20	12	42	100	26.7843	34.8727		0.1233			0.0727	1023.12	99.416	26.7615
2	124.21	15.874	5	7	2014	20	12	42	102	26.7506	34.8746		0.1259		0.0556	0.0732	1023.14	101.405	26.7274
2	124.21	15.874	5	7	2014	20	12	42	104	26.7415	34.8752		0.1353		0.0554	0.0751	1023.15	103.392	26.7178
2	124.21	15.874	5	7	2014	20	12	42	106	26.7343	34.8756		0.1342			0.0749	1023.16	105.379	26.7102
2	124.21	15.874	5	7	2014	20	12	42	108	26.7085	34.8754		0.1236		0.0548	0.0727	1023.18	107.368	26.684
2	124.21	15.874	5	7	2014	20	12	42	110	26.6408	34.8773	0.0051	0.1249		0.0565	0.073	1023.21	109.355	26.6159
2	124.21	15.874	5	7	2014	20	12	42	112	26.621	34.879		0.1207		0.0558	0.0721	1023.23	111.344	26.5956
2	124.21	15.874	5	7	2014	20	12	42	114	26.5822	34.8847	0.0166	0.1275		0.0577	0.0735	1023.25	113.331	26.5563
2	124.21	15.874	5	7	2014	20	12	42	116	26.5162	34.885	0.0069	0.1278		0.0567	0.0736	1023.28	115.318	26.49
2	124.21	15.874	5	7	2014	20	12	42	118	26.4169	34.8835	0.0188	0.1257		0.0579	0.0731	1023.32	117.306	26.3903
2	124.21	15.874	5	7	2014	20	12	42	120	26.3684	34.8803	0.0113	0.1243		0.0571	0.0724	1023.34	119.294	26.3414
2	124.21	15.874	5	7	2014	20	12	42	122	26.2928	34.8757	0.0305	0.1231		0.0591	0.0716	1023.37	121.281	26.2654
2	124.21	15.874	5	7	2014	20	12	42	124	26.2166	34.8782	0.0229	0.127		0.0583	0.0734	1023.41	123.269	26.1888
2	124.21	15.874	5	7	2014	20	12	42	126	26.0917	34.881	0.0297	0.1252		0.059	0.073	1023.46	125.257	26.0635
2	124.21	15.874	5	7	2014	20	12	42	128	25.9634	34.8816	0.0569	0.1247		0.0617	0.073	1023.51	127.244	25.9349
2	124.21	15.874	5	7	2014	20	12	42	130	25.6595	34.8985	0.1186	0.1227		0.0679	0.0725	1023.62	129.232	25.6307
2	124.21	15.874	5	7	2014	20	12	42	132	25.3085	34.9223	0.3193	0.1141		0.0879	0.0708	1023.76	131.22	25.2796
2	124.21	15.874	5	7	2014	20	12	42	134	25.0611	34.9297	0.3754	0.1244		0.0935	0.0729	1023.85	133.207	25.032
2	124.21	15.874	5	7	2014	20	12	42	136	24.9586	34.931	0.3004	0.1207		0.086	0.0721	1023.89	135.195	24.9292
2	124.21	15.874	5	7	2014	20	12	42	138	24.8038	34.9353	0.3102	0.122		0.087	0.0724	1023.95	137.182	24.774
2	124.21	15.874	5	7	2014	20	12	42	140	24.7208	34.9348	0.3071	0.1222		0.0867	0.0725	1023.98	139.169	24.6906
2	124.21	15.874	5	7	2014	20	12	42	142	24.6568	34.9326	0.2613	0.1272		0.0821	0.0735	1024.01	141.158	24.6263
2	124.21	15.874	5	7	2014	20	12	42	144	24.5338	34.9312	0.2496	0.1198		0.081	0.072	1024.05	143.144	24.503
2	124.21	15.874	5	7	2014	20	12	42	146	24.3212	34.9314	0.2187	0.1284		0.0779	0.0737	1024.12	145.133	24.2902
2	124.21	15.874	5	7	2014	20	12	42	148	23.7537	34.9414	0.2114	0.1264		0.0772	0.0733	1024.31	147.119	23.7228
2	124.21	15.874	5	7	2014	20	12	42	150	23.4303	34.9477	0.1898	0.1264		0.075	0.0733	1024.42	149.107	23.3992
2	124.21	15.874	5	7	2014	20	12	42	152	23.0607	34.9629	0.1704	0.131		0.0731	0.0742	1024.55	151.093	23.0296
2	124.21	15.874	5	7	2014	20	12	42	154	22.8555	34.9743	0.146	0.1233		0.0706	0.0727	1024.62	153.082	22.8242
2	124.21	15.874	5	7	2014	20	12	42	156	22.7541	34.9773	0.1382	0.127		0.0698	0.0734	1024.66	155.068	22.7225
2	124.21	15.874	5	7	2014	20	12	42	158	22.7117	34.9802	0.1363	0.1223		0.0696	0.0725	1024.69	157.056	22.6797
2	124.21	15.874	5	7	2014	20	12	42	160	22.6482	34.9834	0.1125	0.1334		0.0672	0.0747	1024.71	159.043	22.6159
2	124.21	15.874	5	7	2014	20	12	42	162	22.3483	34.9763	0.1021	0.1224		0.0662	0.0725	1024.8	161.031	22.3159
2	124.21	15.874	5	7	2014	20	12	42	164	21.8423	34.957	0.087	0.1285		0.0647	0.0737	1024.94	163.017	21.8101
2	124.21	15.874	5	7	2014	20	12	42	166	21.6935	34.9568	0.0637	0.1287		0.0624	0.0738	1024.99	165.005	21.661
2	124.21	15.874	5	7	2014	20	12	42	168	21.5658	34.9553	0.0618	0.1187		0.0622	0.0717	1025.03	166.992	21.533
2	124.21	15.874	5	7	2014	20	12	42	170	21.4333	34.9504	0.0499	0.1224		0.061	0.0725	1025.08	168.98	21.4003
2	124.21	15.874	5	7	2014	20	12	42	172	21.2276	34.944	0.0448	0.1188		0.0605	0.0717	1025.14	170.966	21.1944
2	124.21	15.874	5	7	2014	20	12	42	174	21.053	34.9344	0.0208	0.1213		0.0581	0.0723	1025.19	172.954	21.0196
2	124.21	15.874	5	7	2014	20	12	42	176	20.8958	34.9257	0.0117	0.1211		0.0572	0.0722	1025.23	174.94	20.8623
2	124.21	15.874	5	7	2014	20	12	42	178	20.8049	34.9212	0.005	0.1142		0.0565	0.0708	1025.26	176.928	20.7711
2	124.21	15.874	5	7	2014	20	12	42	180	20.7376	34.9184		0.1223		0.056	0.0725	1025.29	178.915	20.7035
2	124.21	15.874	5	7	2014	20	12	42	182	20.5682	34.9109		0.1156		0.0546	0.0711	1025.34	180.901	20.5339
2	124.21	15.874	5	7	2014	20	12	42	184	20.4546	34.9061		0.1234		0.0541	0.0727	1025.37	182.889	20.42
2	124.21	15.874	5	7	2014	20	12	42	186	20.3115	34.8982		0.1167		0.0533	0.0713	1025.41	184.876	20.2768
2	124.21	15.874	5	7	2014	20	12	42	188	20.0855	34.8889		0.1167		0.0529	0.0714	1025.47	186.862	20.0507
2	124.21	15.874	5	7	2014	20	12	42	190	19.9947	34.8865		0.1169		0.0521	0.0714	1025.51	188.85	19.9596
2	124.21	15.874	5	7	2014	20	12	42	192	19.8748	34.8793		0.1186		0.0517	0.0717	1025.54	190.837	19.8394
2	124.21	15.874	5	7	2014	20	12	42	194	19.6841	34.8661		0.1169		0.0514	0.0715	1025.59	192.824	19.6486
2	124.21	15.874	5	7	2014	20	12	42	196	19.5753	34.8589		0.115		0.0513	0.0714	1025.62	194.811	19.5396
2	124.21	15.874	5	7	2014	20	12	42	198	19.5276	34.8547		0.1172		0.0503	0.0714	1025.64	196.798	19.4917
2	124.21	15.874	5	7	2014	20	12	42	200	19.407	34.8436		0.1167		0.0508	0.0713	1025.67	198.784	19.3708
2	124.21	15.874	5	7	2014	20	12	42	202	19.2687	34.8285		0.1148		0.0516	0.0709	1025.7	200.773	19.2324
2	124.21	15.874	5	7	2014	20	12	42	204	19.2386	34.8248		0.1192		0.0521	0.0718	1025.72	202.756	19.202
2	124.21	15.874	5	7	2014	20	12	42	206	19.0596	34.8068		0.115		0.0516	0.071	1025.76	204.746	19.0229
2	124.21	15.874	5	7	2014	20	12	42	208	18.9212	34.7955		0.1164		0.0507	0.0712	1025.79	206.731	18.8842
2	124.21	15.874	5	7	2014	20	12	42	210	18.7973	34.7861		0.1127		0.0495	0.0705	1025.83	208.719	18.7602
2	124.21	15.874	5	7	2014	20	12	42	212	18.7069	34.7827		0.1213		0.0511	0.0722	1025.86	210.706	18.6696
2	124.21	15.874	5	7	2014	20	12	42	214	18.6787	34.782		0.1132		0.0501	0.0706	1025.87	212.692	18.641
2	124.21	15.874	5	7	2014	20	12	42	216	18.6586	34.7816		0.118		0.0495	0.0716	1025.89	214.679	18.6206
2	124.21	15.874	5	7	2014	20	12	42	218	18.6127	34.7794		0.1202		0.05	0.072	1025.9	216.666	18.5744
2	124.21	15.874	5	7	2014	20	12	42	220	18.5405	34.7766		0.1139		0.0501	0.0708	1025.93	218.653	18.502
2	124.21	15.874	5	7	2014	20	12	42	222	18.5053	34.7763		0.1272		0.0495	0.0735	1025.95	220.639	18.4665
2	124.21	15.874	5	7	2014	20	12	42	224	18.4476	34.7729		0.1183		0.0496	0.0716	1025.97	222.626	18.4085
2	124.21	15.874	5	7	2014	20	12	42	226	18.3954	34.7701		0.1206		0.0492	0.0721	1025.99	224.613	18.3561
2	124.21	15.874	5	7	2014	20	12	42	228	18.385	34.7695		0.1174		0.049	0.0714	1026	226.599	18.3453
2	124.21	15.874	5	7	2014	20	12	42	230	18.3765	34.7691		0.1168		0.0493	0.0714	1026.01	228.585	18.3365
2	124.21	15.874	5	7	2014	20	12	42	232	18.3178	34.7659		0.1216		0.0489	0.0723	1026.03	230.573	18.2775
2	124.21	15.874	5	7	2014	20	12	42	234	18.234	34.7622		0.118		0.0493	0.0716	1026.06	232.558	18.1935
2	124.21	15.874	5	7	2014	20	12	42	236	18.1994	34.7607		0.1109		0.0484	0.0702	1026.07	234.545	18.1586
2	124.21	15.874	5	7	2014	20	12	42	238	18.1446	34.7593		0.1141		0.0484	0.0708	1026.1	236.533	18.1035
2	124.21	15.874	5	7	2014	20	12	42	240	18.1029	34.7629		0.1099		0.0488	0.0699	1026.12	238.518	18.0615
2	124.21	15.874	5	7	2014	20	12	42	242	18.0564	34.763		0.1066		0.0476	0.0693	1026.14	240.505	18.0148
2	124.21	15.874	5	7	2014	20	12	42	244	18.0059	34.7597		0.1134		0.0486	0.0707	1026.16	242.492	17.964
2	124.21	15.874	5	7	2014	20	12	42	246	17.9095	34.7532		0.1271		0.049	0.0735	1026.18	244.477	17.8674
2	124.21	15.874	5	7	2014	20	12	42	248	17.8054	34.7475		0.1032		0.0476	0.0686	1026.21	246.465	17.7631
2	124.21	15.874	5	7	2014	20	12	42	250	17.7689	34.7461		0.1134		0.0493	0.0707	1026.23	248.451	17.7264
2	124.21	15.874	5	7	2014	20	12	42	252	17.7368	34.744		0.1152		0.0491	0.071	1026.25	250.437	17.694
2	124.21	15.874	5	7	2014	20	12	42	254	17.5593	34.7321		0.1097			0.0699	1026.29	252.424	17.5165
2	124.21	15.874	5	7	2014	20	12	42	256	17.5025	34.7289		0.1058		0.0486	0.0692	1026.31	254.411	17.4594
2	124.21	15.874	5	7	2014	20	12	42	258	17.4129	34.7234		0.1194		0.0485	0.0719	1026.34	256.395	17.3697
2	124.21	15.874	5	7	2014	20	12	42	260	17.3467	34.7188		0.1065		0.048	0.0693	1026.36	258.383	17.3032
2	124.21	15.874	5	7	2014	20	12	42	262	17.2824	34.7146		0.108		0.0485	0.0696	1026.38	260.369	17.2386
2	124.21	15.874	5	7	2014	20	12	42	264	17.2054	34.7097		0.1164		0.0484	0.0713	1026.4	262.354	17.1615
2	124.21	15.874	5	7	2014	20	12	42	266	17.0381	34.6968		0.1061		0.0476	0.0692	1026.44	264.342	16.9941
2	124.21	15.874	5	7	2014	20	12	42	268	16.9213	34.6885		0.1096		0.0491	0.0699	1026.47	266.328	16.8772
2	124.21	15.874	5	7	2014	20	12	42	270	16.7716	34.6764		0.1109		0.0488	0.0702	1026.51	268.314	16.7275
2	124.21	15.874	5	7	2014	20	12	42	272	16.6394	34.6674		0.1176		0.0481	0.0715	1026.54	270.3	16.5952
2	124.21	15.874	5	7	2014	20	12	42	274	16.5988	34.6644		0.1106		0.0488	0.0701	1026.56	272.287	16.5543
2	124.21	15.874	5	7	2014	20	12	42	276	16.5522	34.6613		0.1091		0.0481	0.0698	1026.58	274.272	16.5075
2	124.21	15.874	5	7	2014	20	12	42	278	16.5144	34.6587		0.1094		0.0493	0.0699	1026.59	276.258	16.4695
2	124.21	15.874	5	7	2014	20	12	42	280	16.489	34.6569		0.1096		0.0485	0.0699	1026.6	278.245	16.4438
2	124.21	15.874	5	7	2014	20	12	42	282	16.4482	34.6534		0.1147		0.0498	0.0709	1026.62	280.23	16.4027
2	124.21	15.874	5	7	2014	20	12	42	284	16.4138	34.6509		0.1072		0.0488	0.0694	1026.64	282.218	16.368
2	124.21	15.874	5	7	2014	20	12	42	286	16.4092	34.6504		0.1086		0.0482	0.0697	1026.64	284.202	16.3632
2	124.21	15.874	5	7	2014	20	12	42	288	16.4039	34.6502		0.1075		0.049	0.0695	1026.65	286.189	16.3575
2	124.21	15.874	5	7	2014	20	12	42	290	16.403	34.65		0.1099		0.0488	0.07	1026.66	288.175	16.3563
2	124.21	15.874	5	7	2014	20	12	42	292	16.3924	34.6491		0.113		0.0482	0.0706	1026.67	290.161	16.3454
2	124.21	15.874	5	7	2014	20	12	42	294	16.3769	34.6478		0.1149		0.0493	0.071	1026.69	292.147	16.3296
2	124.21	15.874	5	7	2014	20	12	42	296	16.3274	34.6428		0.1141		0.0498	0.0708	1026.7	294.133	16.2799
2	124.21	15.874	5	7	2014	20	12	42	298	16.2472	34.6364		0.1191		0.0492	0.0718	1026.72	296.119	16.1995
2	124.21	15.874	5	7	2014	20	12	42	300	16.1917	34.6322		0.1139		0.0476	0.0708	1026.74	298.105	16.1439
2	124.21	15.874	5	7	2014	20	12	42	302	16.1596	34.6292		0.1102		0.0493	0.07	1026.76	300.091	16.1115
2	124.21	15.874	5	7	2014	20	12	42	304	16.0829	34.6233		0.1101		0.0482	0.07	1026.78	302.077	16.0346
2	124.21	15.874	5	7	2014	20	12	42	306	15.9772	34.6144		0.1126		0.0488	0.0705	1026.81	304.063	15.9288
2	124.21	15.874	5	7	2014	20	12	42	308	15.8083	34.6016		0.113		0.0484	0.0706	1026.84	306.049	15.7599
2	124.21	15.874	5	7	2014	20	12	42	310	15.6868	34.5923		0.1124		0.0476	0.0705	1026.87	308.034	15.6384
2	124.21	15.874	5	7	2014	20	12	42	312	15.6205	34.5881		0.1114		0.0487	0.0703	1026.89	310.021	15.5719
2	124.21	15.874	5	7	2014	20	12	42	314	15.5088	34.5793		0.1156		0.049	0.0711	1026.92	312.006	15.4601
2	124.21	15.874	5	7	2014	20	12	42	316	15.3014	34.5621		0.1159		0.0496	0.0712	1026.97	313.991	15.2529
2	124.21	15.874	5	7	2014	20	12	42	318	15.0295	34.5419		0.1061		0.049	0.0692	1027.02	315.978	14.9813
2	124.21	15.874	5	7	2014	20	12	42	320	14.8237	34.5265		0.1146		0.0493	0.0709	1027.06	317.963	14.7756
2	124.21	15.874	5	7	2014	20	12	42	322	14.7283	34.5202		0.1163		0.0488	0.0712	1027.09	319.949	14.6801
2	124.21	15.874	5	7	2014	20	12	42	324	14.6668	34.5179		0.1101		0.0488	0.07	1027.11	321.935	14.6185
2	124.21	15.874	5	7	2014	20	12	42	326	14.563	34.5106		0.1125		0.049	0.0705	1027.13	323.92	14.5146
2	124.21	15.874	5	7	2014	20	12	42	328	14.4742	34.5054		0.1191		0.0493	0.0718	1027.16	325.906	14.4257
2	124.21	15.874	5	7	2014	20	12	42	330	14.0995	34.4782		0.1114		0.0489	0.0703	1027.23	327.892	14.0515
2	124.21	15.874	5	7	2014	20	12	42	332	13.8507	34.4636		0.112		0.0487	0.0704	1027.28	329.877	13.8031
2	124.21	15.874	5	7	2014	20	12	42	334	13.8045	34.4618		0.1181		0.0501	0.0716	1027.3	331.863	13.7567
2	124.21	15.874	5	7	2014	20	12	42	336	13.6955	34.4549		0.116		0.0497	0.0712	1027.32	333.848	13.6476
2	124.21	15.874	5	7	2014	20	12	42	338	13.593	34.4494		0.1117		0.049	0.0703	1027.35	335.835	13.5451
2	124.21	15.874	5	7	2014	20	12	42	340	13.5612	34.448		0.1153		0.0488	0.071	1027.36	337.819	13.5131
2	124.21	15.874	5	7	2014	20	12	42	342	13.5511	34.4475		0.1092		0.05	0.0698	1027.37	339.805	13.5027
2	124.21	15.874	5	7	2014	20	12	42	344	13.5124	34.4454		0.1164		0.0488	0.0713	1027.39	341.791	13.4638
2	124.21	15.874	5	7	2014	20	12	42	346	13.4602	34.4417		0.1136		0.0497	0.0707	1027.41	343.777	13.4114
2	124.21	15.874	5	7	2014	20	12	42	348	13.4382	34.4406		0.1162		0.0488	0.0712	1027.42	345.761	13.3892
2	124.21	15.874	5	7	2014	20	12	42	350	13.3479	34.4343		0.1232		0.0493	0.0726	1027.44	347.757	13.2989
3	123.81	15.654	5	8	2014	16	8	26	4	29.5477	34.8913		0.1305		0.0528	0.0741	1021.82	3.974	29.5467
3	123.81	15.654	5	8	2014	16	8	26	6	29.5485	34.8944		0.1325		0.0522	0.0745	1021.83	5.967	29.547
3	123.81	15.654	5	8	2014	16	8	26	8	29.5514	34.8946		0.1351		0.052	0.075	1021.83	7.955	29.5495
3	123.81	15.654	5	8	2014	16	8	26	10	29.5331	34.8936		0.0916		0.0526	0.0743	1021.85	9.943	29.5307
3	123.81	15.654	5	8	2014	16	8	26	12	29.4466	34.8912		0.1312		0.0534	0.0741	1021.88	11.932	29.4437
3	123.81	15.654	5	8	2014	16	8	26	14	29.1521	34.8958		0.1275		0.0518	0.0735	1021.99	13.921	29.1487
3	123.81	15.654	5	8	2014	16	8	26	16	28.7453	34.8903		0.1248		0.0528	0.0729	1022.13	15.91	28.7415
3	123.81	15.654	5	8	2014	16	8	26	18	28.363	34.8777		0.1253		0.0528	0.0731	1022.26	17.899	28.3588
3	123.81	15.654	5	8	2014	16	8	26	20	28.2453	34.8639		0.1225		0.0532	0.0725	1022.3	19.886	28.2406
3	123.81	15.654	5	8	2014	16	8	26	22	28.1173	34.8461		0.127		0.0544	0.0734	1022.33	21.875	28.1121
3	123.81	15.654	5	8	2014	16	8	26	24	28.0442	34.8354		0.1262		0.0541	0.0732	1022.36	23.864	28.0385
3	123.81	15.654	5	8	2014	16	8	26	26	27.967	34.8396		0.1235		0.0535	0.0727	1022.4	25.853	27.9608
3	123.81	15.654	5	8	2014	16	8	26	28	27.9194	34.846		0.1193		0.0537	0.0718	1022.43	27.842	27.9128
3	123.81	15.654	5	8	2014	16	8	26	30	27.8665	34.8529		0.1282		0.0535	0.0736	1022.46	29.829	27.8595
3	123.81	15.654	5	8	2014	16	8	26	32	27.817	34.8662		0.1245		0.0558	0.0729	1022.49	31.818	27.8095
3	123.81	15.654	5	8	2014	16	8	26	34	27.7988	34.8729		0.128		0.0556	0.0736	1022.51	33.807	27.7908
3	123.81	15.654	5	8	2014	16	8	26	36	27.7744	34.8763		0.1224		0.0541	0.0725	1022.53	35.795	27.766
3	123.81	15.654	5	8	2014	16	8	26	38	27.7151	34.8785		0.1331		0.0544	0.0746	1022.56	37.784	27.7062
3	123.81	15.654	5	8	2014	16	8	26	40	27.7073	34.8786		0.1252		0.0542	0.073	1022.57	39.773	27.6979
3	123.81	15.654	5	8	2014	16	8	26	42	27.6886	34.8792		0.1198		0.054	0.0719	1022.59	41.761	27.6788
3	123.81	15.654	5	8	2014	16	8	26	44	27.631	34.8736		0.1257		0.0535	0.0732	1022.61	43.749	27.6208
3	123.81	15.654	5	8	2014	16	8	26	46	27.568	34.8656		0.1269		0.0535	0.0734	1022.63	45.738	27.5573
3	123.81	15.654	5	8	2014	16	8	26	48	27.4412	34.8544		0.1238		0.0546	0.0728	1022.67	47.725	27.4301
3	123.81	15.654	5	8	2014	16	8	26	50	27.2996	34.8393		0.1232		0.0543	0.0726	1022.72	49.714	27.288
3	123.81	15.654	5	8	2014	16	8	26	52	27.2229	34.8523		0.135		0.0538	0.075	1022.76	51.702	27.2109
3	123.81	15.654	5	8	2014	16	8	26	54	27.2116	34.8647		0.1323		0.0543	0.0745	1022.78	53.69	27.1992
3	123.81	15.654	5	8	2014	16	8	26	56	27.1377	34.8717		0.1286		0.0544	0.0738	1022.82	55.68	27.1248
3	123.81	15.654	5	8	2014	16	8	26	58	27.1078	34.8763		0.1287		0.0548	0.0738	1022.84	57.666	27.0945
3	123.81	15.654	5	8	2014	16	8	26	60	27.0742	34.8786		-0.1044		0.0547	0.0726	1022.86	59.656	27.0605
3	123.81	15.654	5	8	2014	16	8	26	62	26.9236	34.8782		0.1239		0.0544	0.0735	1022.92	61.644	26.9094
3	123.81	15.654	5	8	2014	16	8	26	64	26.8528	34.882		0.124		0.0554	0.0728	1022.95	63.632	26.8382
3	123.81	15.654	5	8	2014	16	8	26	66	26.7681	34.8842		0.1228		0.0541	0.0726	1022.99	65.621	26.753
3	123.81	15.654	5	8	2014	16	8	26	68	26.683	34.8784		0.1313		0.0544	0.0743	1023.02	67.608	26.6676
3	123.81	15.654	5	8	2014	16	8	26	70	26.6102	34.8757		0.1254		0.0555	0.0731	1023.05	69.597	26.5943
3	123.81	15.654	5	8	2014	16	8	26	72	26.5825	34.8793		0.1227		0.0559	0.0726	1023.07	71.585	26.5662
3	123.81	15.654	5	8	2014	16	8	26	74	26.5043	34.8859		0.1279		0.056	0.0736	1023.11	73.573	26.4876
3	123.81	15.654	5	8	2014	16	8	26	76	26.4705	34.8867		0.1247		0.0553	0.073	1023.13	75.561	26.4533
3	123.81	15.654	5	8	2014	16	8	26	78	26.4414	34.8869	0.0008	0.1261		0.0561	0.0732	1023.14	77.549	26.4238
3	123.81	15.654	5	8	2014	16	8	26	80	26.3653	34.8848	0.0085	0.1286		0.0569	0.0737	1023.18	79.537	26.3473
3	123.81	15.654	5	8	2014	16	8	26	82	26.3071	34.8837	0.0056	0.1247		0.0566	0.0729	1023.2	81.525	26.2886
3	123.81	15.654	5	8	2014	16	8	26	84	26.2571	34.8825	0.0109	0.1315		0.0571	0.0743	1023.23	83.513	26.2382
3	123.81	15.654	5	8	2014	16	8	26	86	26.184	34.881	0.0201	0.1313		0.058	0.0743	1023.26	85.501	26.1647
3	123.81	15.654	5	8	2014	16	8	26	88	26.0889	34.8809		0.1283		0.0557	0.0737	1023.29	87.489	26.0693
3	123.81	15.654	5	8	2014	16	8	26	90	25.9961	34.8836	0.0181	0.1375		0.0578	0.0755	1023.33	89.477	25.976
3	123.81	15.654	5	8	2014	16	8	26	92	25.9219	34.8861	0.0168	0.1359		0.0577	0.0752	1023.37	91.465	25.9015
3	123.81	15.654	5	8	2014	16	8	26	94	25.8587	34.8882	0.0321	0.1346		0.0592	0.0749	1023.4	93.453	25.8378
3	123.81	15.654	5	8	2014	16	8	26	96	25.817	34.8896	0.0395	0.1334		0.06	0.0747	1023.42	95.441	25.7957
3	123.81	15.654	5	8	2014	16	8	26	98	25.7325	34.8955	0.0477	0.1315		0.0608	0.0743	1023.46	97.429	25.7109
3	123.81	15.654	5	8	2014	16	8	26	100	25.6468	34.9004	0.0451	0.1322		0.0605	0.0745	1023.5	99.416	25.6247
3	123.81	15.654	5	8	2014	16	8	26	102	25.4743	34.9118	0.06	0.1302		0.062	0.0741	1023.57	101.404	25.4519
3	123.81	15.654	5	8	2014	16	8	26	104	25.3347	34.9273	0.0916	0.128		0.0651	0.0736	1023.63	103.392	25.3119
3	123.81	15.654	5	8	2014	16	8	26	106	25.2663	34.9337	0.1252	0.1289		0.0685	0.0738	1023.67	105.379	25.2431
3	123.81	15.654	5	8	2014	16	8	26	108	25.208	34.9381	0.1167	0.129		0.0677	0.0738	1023.7	107.368	25.1844
3	123.81	15.654	5	8	2014	16	8	26	110	25.0315	34.9472	0.1291	0.1295		0.0689	0.0739	1023.77	109.355	25.0077
3	123.81	15.654	5	8	2014	16	8	26	112	24.9714	34.9523	0.1303	0.1388		0.069	0.0758	1023.8	111.345	24.9471
3	123.81	15.654	5	8	2014	16	8	26	114	24.8194	34.9656	0.1593	0.1297		0.0719	0.074	1023.86	113.33	24.7948
3	123.81	15.654	5	8	2014	16	8	26	116	24.6525	34.9771	0.1786	0.1295		0.0739	0.0739	1023.93	115.319	24.6276
3	123.81	15.654	5	8	2014	16	8	26	118	24.464	34.9864	0.281	0.1257		0.0841	0.0732	1024	117.306	24.4388
3	123.81	15.654	5	8	2014	16	8	26	120	24.3339	34.9918	0.3486	0.1298		0.0909	0.074	1024.05	119.294	24.3084
3	123.81	15.654	5	8	2014	16	8	26	122	24.226	34.9992	0.4369	0.1265		0.0997	0.0733	1024.1	121.282	24.2001
3	123.81	15.654	5	8	2014	16	8	26	124	24.1336	35.0064	0.4337	0.1299		0.0994	0.074	1024.14	123.269	24.1074
3	123.81	15.654	5	8	2014	16	8	26	126	23.9503	35.0087	0.3938	0.1298		0.0954	0.074	1024.21	125.257	23.9238
3	123.81	15.654	5	8	2014	16	8	26	128	23.9	35.0063	0.3981	0.1285		0.0958	0.0737	1024.23	127.244	23.8732
3	123.81	15.654	5	8	2014	16	8	26	130	23.8292	35.0024	0.3795	0.131		0.0939	0.0742	1024.26	129.232	23.8019
3	123.81	15.654	5	8	2014	16	8	26	132	23.6345	34.996	0.3637	0.1319		0.0924	0.0744	1024.32	131.219	23.607
3	123.81	15.654	5	8	2014	16	8	26	134	23.3984	35.0029	0.3085	0.1326		0.0869	0.0745	1024.4	133.207	23.3707
3	123.81	15.654	5	8	2014	16	8	26	136	23.1422	35.017	0.2434	0.1321		0.0804	0.0744	1024.49	135.194	23.1143
3	123.81	15.654	5	8	2014	16	8	26	138	22.9597	35.0165	0.249	0.1366		0.0809	0.0753	1024.55	137.182	22.9315
3	123.81	15.654	5	8	2014	16	8	26	140	22.8492	35.0121	0.1954	0.1354		0.0755	0.0751	1024.59	139.17	22.8207
3	123.81	15.654	5	8	2014	16	8	26	142	22.7716	35.0084	0.2003	0.13		0.076	0.074	1024.62	141.157	22.7429
3	123.81	15.654	5	8	2014	16	8	26	144	22.686	35.0045	0.1586	0.1347		0.0719	0.0749	1024.65	143.145	22.6569
3	123.81	15.654	5	8	2014	16	8	26	146	22.5587	34.9949	0.2193	0.1247		0.0779	0.073	1024.69	145.131	22.5293
3	123.81	15.654	5	8	2014	16	8	26	148	22.3851	34.9871	0.1442	0.1348		0.0704	0.0751	1024.74	147.119	22.3555
3	123.81	15.654	5	8	2014	16	8	26	150	22.345	34.9891	0.1621	0.1306		0.0722	0.0741	1024.76	149.106	22.315
3	123.81	15.654	5	8	2014	16	8	26	152	22.3415	34.9907	0.1473	0.1235		0.0707	0.0727	1024.77	151.094	22.3111
3	123.81	15.654	5	8	2014	16	8	26	154	22.3346	34.9925	0.1377	0.1283		0.0698	0.0737	1024.79	153.081	22.3038
3	123.81	15.654	5	8	2014	16	8	26	156	22.2788	34.9912	0.1568	0.1227		0.0717	0.0725	1024.81	155.069	22.2477
3	123.81	15.654	5	8	2014	16	8	26	158	22.1355	34.9876	0.1281	0.1236		0.0688	0.0727	1024.86	157.056	22.1042
3	123.81	15.654	5	8	2014	16	8	26	160	21.9435	34.9822	0.1385	-0.0824		0.0699	0.0719	1024.91	159.043	21.9119
3	123.81	15.654	5	8	2014	16	8	26	162	21.7871	34.9747	0.0748	0.122		0.0635	0.0734	1024.96	161.033	21.7553
3	123.81	15.654	5	8	2014	16	8	26	164	21.6708	34.9684	0.0942	0.1232		0.0655	0.0727	1025	163.016	21.6387
3	123.81	15.654	5	8	2014	16	8	26	166	21.6343	34.967	0.0783	0.1265		0.0639	0.0733	1025.02	165.005	21.6019
3	123.81	15.654	5	8	2014	16	8	26	168	21.5926	34.9649	0.0862	0.1217		0.0646	0.0723	1025.03	166.992	21.5598
3	123.81	15.654	5	8	2014	16	8	26	170	21.459	34.9561	0.0708	0.126		0.0631	0.0732	1025.07	168.98	21.4259
3	123.81	15.654	5	8	2014	16	8	26	172	21.15	34.9369	0.0571	0.1228		0.0617	0.0726	1025.15	170.966	21.1169
3	123.81	15.654	5	8	2014	16	8	26	174	21.0599	34.9314	0.0418	0.1202		0.0602	0.072	1025.18	172.953	21.0265
3	123.81	15.654	5	8	2014	16	8	26	176	20.8583	34.9165	0.0449	0.121		0.0605	0.0722	1025.23	174.941	20.8248
3	123.81	15.654	5	8	2014	16	8	26	178	20.5812	34.8993	0.0161	0.1275		0.0576	0.0735	1025.31	176.928	20.5476
3	123.81	15.654	5	8	2014	16	8	26	180	20.4175	34.8916	0.0147	0.1315		0.0575	0.0743	1025.35	178.915	20.3837
3	123.81	15.654	5	8	2014	16	8	26	182	20.2947	34.8859	0.0159	0.1297		0.0576	0.0739	1025.39	180.901	20.2608
3	123.81	15.654	5	8	2014	16	8	26	184	20.139	34.8793	0.0003	0.1206		0.056	0.0721	1025.43	182.889	20.1048
3	123.81	15.654	5	8	2014	16	8	26	186	19.9762	34.873		0.1202		0.0557	0.072	1025.48	184.875	19.9419
3	123.81	15.654	5	8	2014	16	8	26	188	19.9435	34.8717		0.1138		0.0549	0.0707	1025.5	186.864	19.9089
3	123.81	15.654	5	8	2014	16	8	26	190	19.9215	34.8714		0.1173		0.0549	0.0714	1025.51	188.85	19.8865
3	123.81	15.654	5	8	2014	16	8	26	192	19.9014	34.8708		0.1232		0.0545	0.0726	1025.53	190.837	19.8661
3	123.81	15.654	5	8	2014	16	8	26	194	19.8538	34.8684		0.1166		0.0551	0.0713	1025.55	192.824	19.8181
3	123.81	15.654	5	8	2014	16	8	26	196	19.767	34.8625		0.1124		0.0523	0.0705	1025.57	194.811	19.7311
3	123.81	15.654	5	8	2014	16	8	26	198	19.6064	34.8539		0.1249		0.0518	0.073	1025.62	196.797	19.5704
3	123.81	15.654	5	8	2014	16	8	26	200	19.5236	34.849		0.1176		0.0515	0.0715	1025.64	198.785	19.4873
3	123.81	15.654	5	8	2014	16	8	26	202	19.4283	34.8439		0.1123		0.05	0.0704	1025.67	200.771	19.3917
3	123.81	15.654	5	8	2014	16	8	26	204	19.3363	34.8409		0.1141		0.0505	0.0708	1025.7	202.759	19.2995
3	123.81	15.654	5	8	2014	16	8	26	206	19.3016	34.8406		0.1114		0.0503	0.0703	1025.72	204.745	19.2645
3	123.81	15.654	5	8	2014	16	8	26	208	19.2654	34.841		0.1174		0.0496	0.0714	1025.74	206.731	19.228
3	123.81	15.654	5	8	2014	16	8	26	210	19.1064	34.831		0.1104		0.0498	0.0701	1025.78	208.72	19.0688
3	123.81	15.654	5	8	2014	16	8	26	212	18.904	34.8195		0.1114		0.0511	0.0703	1025.83	210.705	18.8664
3	123.81	15.654	5	8	2014	16	8	26	214	18.8051	34.8216		0.1189		0.0501	0.0717	1025.87	212.693	18.7672
3	123.81	15.654	5	8	2014	16	8	26	216	18.6854	34.8216		0.1055		0.0494	0.0691	1025.91	214.679	18.6474
3	123.81	15.654	5	8	2014	16	8	26	218	18.6561	34.8225		0.1089		0.0498	0.0698	1025.93	216.666	18.6178
3	123.81	15.654	5	8	2014	16	8	26	220	18.6206	34.8203		0.1169		0.0489	0.0714	1025.94	218.652	18.5819
3	123.81	15.654	5	8	2014	16	8	26	222	18.4573	34.8063		0.1097		0.0498	0.0699	1025.98	220.64	18.4185
3	123.81	15.654	5	8	2014	16	8	26	224	18.2287	34.7868		0.1143		0.0485	0.0708	1026.03	222.625	18.1899
3	123.81	15.654	5	8	2014	16	8	26	226	18.1266	34.7786		0.1096		0.0492	0.0699	1026.06	224.614	18.0876
3	123.81	15.654	5	8	2014	16	8	26	228	17.8781	34.7606		0.107		0.048	0.0694	1026.12	226.599	17.8392
3	123.81	15.654	5	8	2014	16	8	26	230	17.8313	34.7577		0.1073		0.0482	0.0695	1026.14	228.586	17.792
3	123.81	15.654	5	8	2014	16	8	26	232	17.7958	34.7556		0.1054		0.0485	0.0691	1026.15	230.572	17.7563
3	123.81	15.654	5	8	2014	16	8	26	234	17.729	34.7498		0.1053		0.0483	0.0691	1026.17	232.559	17.6893
3	123.81	15.654	5	8	2014	16	8	26	236	17.6482	34.7441		0.1091		0.0484	0.0698	1026.2	234.546	17.6082
3	123.81	15.654	5	8	2014	16	8	26	238	17.5685	34.7367		0.1064		0.0478	0.0693	1026.22	236.531	17.5284
3	123.81	15.654	5	8	2014	16	8	26	240	17.452	34.7267		0.112		0.0493	0.0704	1026.25	238.519	17.4117
3	123.81	15.654	5	8	2014	16	8	26	242	17.4242	34.7246		0.1089		0.0489	0.0698	1026.26	240.505	17.3836
3	123.81	15.654	5	8	2014	16	8	26	244	17.4077	34.7235		0.1072		0.0492	0.0694	1026.28	242.491	17.3667
3	123.81	15.654	5	8	2014	16	8	26	246	17.3201	34.7164		0.1046		0.048	0.0689	1026.3	244.478	17.279
3	123.81	15.654	5	8	2014	16	8	26	248	17.2031	34.7073		0.1049		0.0488	0.069	1026.33	246.464	17.1619
3	123.81	15.654	5	8	2014	16	8	26	250	17.1648	34.7047		0.1044		0.0479	0.0689	1026.35	248.451	17.1233
3	123.81	15.654	5	8	2014	16	8	26	252	17.142	34.703		0.1098		0.0489	0.07	1026.36	250.437	17.1002
3	123.81	15.654	5	8	2014	16	8	26	254	17.1138	34.7011		0.1048		0.0489	0.069	1026.37	252.423	17.0717
3	123.81	15.654	5	8	2014	16	8	26	256	17.102	34.7004		0.1048		0.0483	0.069	1026.39	254.411	17.0596
3	123.81	15.654	5	8	2014	16	8	26	258	17.0757	34.6982		0.1131		0.0497	0.0706	1026.4	256.396	17.033
3	123.81	15.654	5	8	2014	16	8	26	260	17.0241	34.6938		0.1065		0.0489	0.0693	1026.42	258.382	16.9812
3	123.81	15.654	5	8	2014	16	8	26	262	16.9135	34.6849		0.0963		0.0492	0.0673	1026.45	260.369	16.8704
3	123.81	15.654	5	8	2014	16	8	26	264	16.7886	34.676				0.0487		1026.48	262.355	16.7454
3	123.81	15.654	5	8	2014	16	8	26	266	16.7361	34.6717		0.1032		0.0491	0.0687	1026.5	264.341	16.6927
3	123.81	15.654	5	8	2014	16	8	26	268	16.6931	34.6687		0.1079		0.0494	0.0696	1026.51	266.328	16.6494
3	123.81	15.654	5	8	2014	16	8	26	270	16.6291	34.6639		0.1127		0.0488	0.0705	1026.53	268.314	16.5852
3	123.81	15.654	5	8	2014	16	8	26	272	16.5749	34.6599		0.1062		0.048	0.0692	1026.55	270.299	16.5308
3	123.81	15.654	5	8	2014	16	8	26	274	16.524	34.6562		0.1012		0.0488	0.0683	1026.57	272.287	16.4797
3	123.81	15.654	5	8	2014	16	8	26	276	16.4601	34.6512		0.1078		0.0489	0.0696	1026.59	274.272	16.4156
3	123.81	15.654	5	8	2014	16	8	26	278	16.3089	34.6394		0.1052		0.0491	0.069	1026.62	276.259	16.2643
3	123.81	15.654	5	8	2014	16	8	26	280	16.1757	34.6299		0.1035		0.049	0.0687	1026.66	278.245	16.1311
3	123.81	15.654	5	8	2014	16	8	26	282	16.0918	34.6242		0.1022		0.0477	0.0685	1026.68	280.23	16.047
3	123.81	15.654	5	8	2014	16	8	26	284	16.0431	34.6214		0.105		0.0475	0.069	1026.7	282.217	15.9981
3	123.81	15.654	5	8	2014	16	8	26	286	15.975	34.6166		0.1052		0.0496	0.0691	1026.72	284.204	15.9299
3	123.81	15.654	5	8	2014	16	8	26	288	15.7853	34.6028		0.1106		0.0481	0.0701	1026.76	286.188	15.7402
3	123.81	15.654	5	8	2014	16	8	26	290	15.7083	34.5973		0.1077		0.048	0.0695	1026.78	288.175	15.6631
3	123.81	15.654	5	8	2014	16	8	26	292	15.6383	34.5921		0.1021		0.0487	0.0684	1026.81	290.162	15.5928
3	123.81	15.654	5	8	2014	16	8	26	294	15.6051	34.59		0.1048		0.049	0.069	1026.82	292.147	15.5594
3	123.81	15.654	5	8	2014	16	8	26	296	15.5155	34.5822		0.1047		0.0501	0.0689	1026.84	294.133	15.4696
3	123.81	15.654	5	8	2014	16	8	26	298	15.3827	34.5728		0.1085		0.0493	0.0697	1026.88	296.12	15.3368
3	123.81	15.654	5	8	2014	16	8	26	300	15.3234	34.568		0.1079		0.0487	0.0696	1026.89	298.104	15.2773
3	123.81	15.654	5	8	2014	16	8	26	302	15.2087	34.5588		0.1022		0.0498	0.0684	1026.92	300.092	15.1626
3	123.81	15.654	5	8	2014	16	8	26	304	15.0742	34.5492		0.1059		0.0498	0.0692	1026.95	302.076	15.028
3	123.81	15.654	5	8	2014	16	8	26	306	14.9425	34.5389		0.1081		0.0491	0.0696	1026.98	304.063	14.8963
3	123.81	15.654	5	8	2014	16	8	26	308	14.8797	34.5347		0.098		0.0484	0.0676	1027	306.049	14.8334
3	123.81	15.654	5	8	2014	16	8	26	310	14.8176	34.5298		0.0991		0.0487	0.0678	1027.02	308.034	14.7711
3	123.81	15.654	5	8	2014	16	8	26	312	14.6461	34.5171		0.1077		0.0493	0.0696	1027.06	310.02	14.5997
3	123.81	15.654	5	8	2014	16	8	26	314	14.4727	34.5049		0.1025		0.0499	0.0685	1027.1	312.007	14.4263
3	123.81	15.654	5	8	2014	16	8	26	316	14.409	34.5016		0.1009		0.0497	0.0682	1027.12	313.991	14.3624
3	123.81	15.654	5	8	2014	16	8	26	318	14.3762	34.4998		0.1042		0.0502	0.0689	1027.13	315.977	14.3294
3	123.81	15.654	5	8	2014	16	8	26	320	14.3549	34.499		0.0986		0.05	0.0677	1027.14	317.963	14.3079
3	123.81	15.654	5	8	2014	16	8	26	322	14.3043	34.4952		0.109		0.0491	0.0698	1027.16	319.949	14.2571
3	123.81	15.654	5	8	2014	16	8	26	324	14.1769	34.4873		0.1014		0.0483	0.0683	1027.19	321.935	14.1297
3	123.81	15.654	5	8	2014	16	8	26	326	14.07	34.4809		0.1055		0.0495	0.0691	1027.22	323.92	14.0227
3	123.81	15.654	5	8	2014	16	8	26	328	13.9839	34.4758		0.1018		0.0483	0.0684	1027.24	325.906	13.9365
3	123.81	15.654	5	8	2014	16	8	26	330	13.8633	34.4707		0.1026		0.0491	0.0685	1027.27	327.892	13.8159
3	123.81	15.654	5	8	2014	16	8	26	332	13.7465	34.4611		0.0977		0.0491	0.0676	1027.3	329.877	13.6992
3	123.81	15.654	5	8	2014	16	8	26	334	13.588	34.45		0.1062		0.049	0.0692	1027.33	331.864	13.5407
3	123.81	15.654	5	8	2014	16	8	26	336	13.4999	34.4441		0.1016		0.0492	0.0683	1027.36	333.848	13.4525
3	123.81	15.654	5	8	2014	16	8	26	338	13.4351	34.4405		0.1049		0.049	0.069	1027.38	335.834	13.3876
3	123.81	15.654	5	8	2014	16	8	26	340	13.3389	34.4333		0.1047		0.0499	0.069	1027.4	337.82	13.2913
3	123.81	15.654	5	8	2014	16	8	26	342	13.1901	34.4238		0.1055			0.0691	1027.43	339.806	13.1426
3	123.81	15.654	5	8	2014	16	8	26	344	13.1188	34.4195		0.1077		0.0496	0.0695	1027.45	341.789	13.0712
3	123.81	15.654	5	8	2014	16	8	26	346	13.0293	34.4133		0.1054		0.0487	0.0691	1027.47	343.777	12.9816
3	123.81	15.654	5	8	2014	16	8	26	348	12.9087	34.4052		0.0994		0.049	0.0679	1027.5	345.762	12.8611
3	123.81	15.654	5	8	2014	16	8	26	350	12.8434	34.4011		0.1155		0.0491	0.0711	1027.52	347.749	12.7956
4	123.96	15.777	5	8	2014	19	16	46	4	29.6424	34.3599		0.116	5.9089	0.0514	0.0712	1021.38	3.978	29.6415
4	123.96	15.777	5	8	2014	19	16	46	6	29.6487	34.6835		0.1172	5.4605	0.0515	0.0714	1021.63	5.966	29.6472
4	123.96	15.777	5	8	2014	19	16	46	8	29.6529	34.6912		0.1199	5.4347	0.0522	0.072	1021.65	7.955	29.6509
4	123.96	15.777	5	8	2014	19	16	46	10	29.641	34.6901		0.1153	5.46044	0.0518	0.071	1021.66	9.944	29.6386
4	123.96	15.777	5	8	2014	19	16	46	12	29.617	34.6878		0.1164	5.46616	0.0518	0.0713	1021.67	11.932	29.6141
4	123.96	15.777	5	8	2014	19	16	46	14	29.3565	34.6791		0.119	5.52974	0.0522	0.0718	1021.76	13.922	29.353
4	123.96	15.777	5	8	2014	19	16	46	16	29.1086	34.771		0.1173	5.63663	0.0511	0.0714	1021.92	15.91	29.1047
4	123.96	15.777	5	8	2014	19	16	46	18	28.3813	34.8815		0.1203	5.7419	0.0526	0.072	1022.26	17.898	28.377
4	123.96	15.777	5	8	2014	19	16	46	20	28.2283	34.8874		0.1162	5.7713	0.0534	0.0712	1022.32	19.887	28.2236
4	123.96	15.777	5	8	2014	19	16	46	22	28.1637	34.8868		0.1213	5.76363	0.0548	0.0723	1022.35	21.876	28.1585
4	123.96	15.777	5	8	2014	19	16	46	24	28.1151	34.8879		0.1178	5.7559	0.0541	0.0715	1022.38	23.864	28.1094
4	123.96	15.777	5	8	2014	19	16	46	26	28.0913	34.8925		0.1184	5.75291	0.0543	0.0717	1022.4	25.853	28.0852
4	123.96	15.777	5	8	2014	19	16	46	28	28.033	34.8947	0.0005	0.1153	5.75991	0.0561	0.071	1022.42	27.841	28.0264
4	123.96	15.777	5	8	2014	19	16	46	30	27.9914	34.8987		0.1217	5.74626	0.0549	0.0723	1022.45	29.83	27.9843
4	123.96	15.777	5	8	2014	19	16	46	32	27.9628	34.8965		0.1172	5.75897	0.0535	0.0714	1022.47	31.819	27.9553
4	123.96	15.777	5	8	2014	19	16	46	34	27.9168	34.8957		0.125	5.76771	0.0541	0.073	1022.49	33.806	27.9088
4	123.96	15.777	5	8	2014	19	16	46	36	27.9062	34.9062		0.126	5.76696	0.0545	0.0732	1022.51	35.796	27.8978
4	123.96	15.777	5	8	2014	19	16	46	38	27.8726	34.9073		0.1153	5.77266	0.0556	0.071	1022.53	37.784	27.8637
4	123.96	15.777	5	8	2014	19	16	46	40	27.8519	34.9074		0.1226	5.78038	0.0558	0.0725	1022.54	39.772	27.8426
4	123.96	15.777	5	8	2014	19	16	46	42	27.8122	34.9084	0.0087	0.1216	5.79704	0.0569	0.0723	1022.57	41.761	27.8023
4	123.96	15.777	5	8	2014	19	16	46	44	27.7681	34.9074		0.126	5.80292	0.0556	0.0732	1022.59	43.749	27.7578
4	123.96	15.777	5	8	2014	19	16	46	46	27.7409	34.908		0.1295	5.81266	0.0553	0.0739	1022.61	45.737	27.7301
4	123.96	15.777	5	8	2014	19	16	46	48	27.7243	34.9064	0.0134	0.1171	5.80586	0.0573	0.0714	1022.62	47.726	27.713
4	123.96	15.777	5	8	2014	19	16	46	50	27.6785	34.9039		0.1227	5.82677	0.0556	0.0726	1022.64	49.714	27.6668
4	123.96	15.777	5	8	2014	19	16	46	52	27.5126	34.8892		0.1211	5.85944	0.0558	0.0722	1022.69	51.702	27.5006
4	123.96	15.777	5	8	2014	19	16	46	54	27.3259	34.8814	0.0076	0.1269	5.90465	0.0567	0.0734	1022.76	53.691	27.3134
4	123.96	15.777	5	8	2014	19	16	46	56	27.1582	34.8815	0.0048	0.1276	5.94321	0.0565	0.0735	1022.82	55.679	27.1453
4	123.96	15.777	5	8	2014	19	16	46	58	27.0549	34.8822		0.1248	5.95295	0.0549	0.073	1022.86	57.668	27.0416
4	123.96	15.777	5	8	2014	19	16	46	60	26.94	34.8842		0.1222	5.96805	0.0548	0.0724	1022.91	59.655	26.9263
4	123.96	15.777	5	8	2014	19	16	46	62	26.8729	34.8853		0.1246	5.9662	0.0547	0.0729	1022.94	61.643	26.8587
4	123.96	15.777	5	8	2014	19	16	46	64	26.8369	34.8866		0.1278	5.9624	0.0558	0.0736	1022.96	63.633	26.8223
4	123.96	15.777	5	8	2014	19	16	46	66	26.7544	34.8879		0.1204	5.96099	0.0552	0.0721	1022.99	65.62	26.7394
4	123.96	15.777	5	8	2014	19	16	46	68	26.6593	34.8894	0.0009	0.1208	5.94315	0.0561	0.0722	1023.03	67.609	26.6439
4	123.96	15.777	5	8	2014	19	16	46	70	26.5795	34.8891		0.1236	5.86659	0.0558	0.0727	1023.07	69.596	26.5636
4	123.96	15.777	5	8	2014	19	16	46	72	26.5351	34.8886	0.0067	0.1183	5.80598	0.0567	0.0716	1023.09	71.585	26.5188
4	123.96	15.777	5	8	2014	19	16	46	74	26.4649	34.8893		0.1173	5.86105	0.0556	0.0714	1023.12	73.573	26.4482
4	123.96	15.777	5	8	2014	19	16	46	76	26.428	34.8877	0.0109	0.1204	5.89308	0.0572	0.0721	1023.14	75.56	26.4109
4	123.96	15.777	5	8	2014	19	16	46	78	26.3968	34.8878	0.01	0.1252	5.89764	0.057	0.073	1023.16	77.55	26.3792
4	123.96	15.777	5	8	2014	19	16	46	80	26.3088	34.8873	0.0053	0.1213	5.89711	0.0565	0.0722	1023.2	79.536	26.2908
4	123.96	15.777	5	8	2014	19	16	46	82	26.2177	34.8848		0.1167	5.88885	0.0557	0.0713	1023.23	81.525	26.1993
4	123.96	15.777	5	8	2014	19	16	46	84	26.1359	34.8881	0.0124	0.1215	5.85785	0.0573	0.0723	1023.27	83.513	26.1171
4	123.96	15.777	5	8	2014	19	16	46	86	26.0524	34.8888	0.0137	0.1238	5.84765	0.0574	0.0728	1023.3	85.501	26.0332
4	123.96	15.777	5	8	2014	19	16	46	88	25.9736	34.8891	0.0224	0.122	5.82127	0.0582	0.0724	1023.34	87.489	25.954
4	123.96	15.777	5	8	2014	19	16	46	90	25.9127	34.8901	0.0269	0.1204	5.8074	0.0587	0.0721	1023.36	89.477	25.8927
4	123.96	15.777	5	8	2014	19	16	46	92	25.7605	34.8944	0.0223	0.1284	5.79053	0.0582	0.0737	1023.42	91.464	25.7401
4	123.96	15.777	5	8	2014	19	16	46	94	25.714	34.8973	0.051	0.1287	5.76188	0.0611	0.0738	1023.45	93.453	25.6932
4	123.96	15.777	5	8	2014	19	16	46	96	25.5949	34.9028	0.0455	0.1301	5.7572	0.0605	0.074	1023.5	95.44	25.5738
4	123.96	15.777	5	8	2014	19	16	46	98	25.5135	34.9091	0.0531	0.1282	5.70852	0.0613	0.0736	1023.54	97.429	25.492
4	123.96	15.777	5	8	2014	19	16	46	100	25.4821	34.9109	0.0603	0.1201	5.68711	0.0621	0.072	1023.56	99.416	25.4601
4	123.96	15.777	5	8	2014	19	16	46	102	25.421	34.914	0.0701	0.1296	5.67787	0.063	0.0739	1023.59	101.404	25.3986
4	123.96	15.777	5	8	2014	19	16	46	104	25.2222	34.9299	0.0836	0.1241	5.63372	0.0644	0.0728	1023.67	103.392	25.1995
4	123.96	15.777	5	8	2014	19	16	46	106	25.1771	34.9359	0.1025	0.1328	5.581	0.0662	0.0746	1023.7	105.379	25.154
4	123.96	15.777	5	8	2014	19	16	46	108	25.0954	34.9474	0.1229	0.1247	5.56643	0.0683	0.073	1023.74	107.368	25.0719
4	123.96	15.777	5	8	2014	19	16	46	110	24.887	34.9681	0.2019	0.1248	5.50911	0.0762	0.073	1023.83	109.355	24.8633
4	123.96	15.777	5	8	2014	19	16	46	112	24.7609	34.9643	0.2583	0.1145	5.50344	0.0819	0.0709	1023.87	111.343	24.7368
4	123.96	15.777	5	8	2014	19	16	46	114	24.5289	34.9577	0.4647	0.12	5.46079	0.1025	0.072	1023.94	113.331	24.5045
4	123.96	15.777	5	8	2014	19	16	46	116	24.3276	34.9378	0.4767	0.1219	5.42602	0.1037	0.0724	1024	115.319	24.303
4	123.96	15.777	5	8	2014	19	16	46	118	24.2442	34.939	0.4311	0.1194	5.39331	0.0991	0.0719	1024.03	117.306	24.2192
4	123.96	15.777	5	8	2014	19	16	46	120	24.194	34.9491	0.4159	0.1238	5.36573	0.0976	0.0728	1024.06	119.294	24.1686
4	123.96	15.777	5	8	2014	19	16	46	122	24.1567	34.9642	0.3635	0.1189	5.32101	0.0924	0.0718	1024.09	121.281	24.1309
4	123.96	15.777	5	8	2014	19	16	46	124	24.1317	34.9783	0.3353	0.1279	5.30288	0.0895	0.0736	1024.12	123.269	24.1055
4	123.96	15.777	5	8	2014	19	16	46	126	24.0138	34.9863	0.2973	0.1263	5.27767	0.0857	0.0733	1024.17	125.257	23.9873
4	123.96	15.777	5	8	2014	19	16	46	128	23.9262	34.9876	0.314	0.1221	5.24898	0.0874	0.0724	1024.21	127.244	23.8993
4	123.96	15.777	5	8	2014	19	16	46	130	23.882	34.9867	0.2775	0.1242	5.22151	0.0837	0.0728	1024.23	129.232	23.8548
4	123.96	15.777	5	8	2014	19	16	46	132	23.8631	34.9888	0.2861	0.1218	5.20354	0.0846	0.0724	1024.24	131.219	23.8355
4	123.96	15.777	5	8	2014	19	16	46	134	23.8562	34.9903	0.2863	0.1259	5.18989	0.0846	0.0732	1024.26	133.207	23.8281
4	123.96	15.777	5	8	2014	19	16	46	136	23.8442	34.9938	0.2829	0.1238	5.17239	0.0843	0.0728	1024.27	135.194	23.8157
4	123.96	15.777	5	8	2014	19	16	46	138	23.8015	35.002	0.2736	0.1278	5.1751	0.0833	0.0736	1024.3	137.182	23.7726
4	123.96	15.777	5	8	2014	19	16	46	140	23.5614	35.0121	0.2505	0.1262	5.15487	0.081	0.0733	1024.38	139.169	23.5323
4	123.96	15.777	5	8	2014	19	16	46	142	23.4381	35.0043	0.2376	0.1275	5.14544	0.0798	0.0736	1024.42	141.157	23.4087
4	123.96	15.777	5	8	2014	19	16	46	144	23.3448	34.9985	0.2162	0.1261	5.15429	0.0776	0.0733	1024.46	143.144	23.3151
4	123.96	15.777	5	8	2014	19	16	46	146	23.1888	34.996	0.209	0.1164	5.17013	0.0769	0.0713	1024.51	145.132	23.1588
4	123.96	15.777	5	8	2014	19	16	46	148	23.0667	34.9888	0.1915	0.1233	5.17778	0.0752	0.0727	1024.55	147.119	23.0364
4	123.96	15.777	5	8	2014	19	16	46	150	22.9621	34.9888	0.1764	0.1202	5.18299	0.0737	0.072	1024.59	149.107	22.9315
4	123.96	15.777	5	8	2014	19	16	46	152	22.8765	34.9875	0.1672	0.1179	5.1858	0.0727	0.0715	1024.62	151.094	22.8456
4	123.96	15.777	5	8	2014	19	16	46	154	22.6819	34.9801	0.1513	0.121	5.20959	0.0711	0.0722	1024.68	153.081	22.6508
4	123.96	15.777	5	8	2014	19	16	46	156	22.4948	34.9734	0.1571	0.1199	5.22366	0.0717	0.072	1024.73	155.069	22.4635
4	123.96	15.777	5	8	2014	19	16	46	158	22.42	34.9732	0.1324	0.1187	5.22893	0.0692	0.0717	1024.76	157.056	22.3883
4	123.96	15.777	5	8	2014	19	16	46	160	22.3383	34.9757	0.1323	0.1192	5.22504	0.0692	0.0718	1024.8	159.043	22.3063
4	123.96	15.777	5	8	2014	19	16	46	162	22.2962	34.9769	0.1209	0.1192	5.2179	0.0681	0.0718	1024.82	161.031	22.2639
4	123.96	15.777	5	8	2014	19	16	46	164	22.2533	34.978	0.1309	0.1222	5.22006	0.0691	0.0724	1024.84	163.017	22.2206
4	123.96	15.777	5	8	2014	19	16	46	166	22.1697	34.9815	0.1095	0.1191	5.22001	0.0669	0.0718	1024.88	165.005	22.1366
4	123.96	15.777	5	8	2014	19	16	46	168	22.0891	34.9853	0.116	0.1188	5.2226	0.0676	0.0717	1024.91	166.992	22.0558
4	123.96	15.777	5	8	2014	19	16	46	170	21.9286	34.9819	0.1052	0.117	5.2255	0.0665	0.0714	1024.96	168.979	21.895
4	123.96	15.777	5	8	2014	19	16	46	172	21.779	34.9738	0.0786	0.1182	5.23729	0.0639	0.0716	1025.01	170.967	21.7452
4	123.96	15.777	5	8	2014	19	16	46	174	21.6535	34.9702	0.0812	0.1143	5.27024	0.0641	0.0708	1025.05	172.953	21.6195
4	123.96	15.777	5	8	2014	19	16	46	176	21.3556	34.9516	0.0743	0.1106	5.29249	0.0635	0.0701	1025.12	174.941	21.3215
4	123.96	15.777	5	8	2014	19	16	46	178	21.2652	34.949	0.06	0.1125	5.30757	0.062	0.0705	1025.16	176.928	21.2308
4	123.96	15.777	5	8	2014	19	16	46	180	21.169	34.9439	0.0622	0.1166	5.32045	0.0623	0.0713	1025.19	178.914	21.1344
4	123.96	15.777	5	8	2014	19	16	46	182	21.0521	34.9394	0.0396	0.1171	5.32672	0.0599	0.0714	1025.22	180.903	21.0173
4	123.96	15.777	5	8	2014	19	16	46	184	20.9705	34.9363	0.0404	0.1114	5.33203	0.06	0.0703	1025.25	182.889	20.9353
4	123.96	15.777	5	8	2014	19	16	46	186	20.9039	34.9315	0.0257	0.1164	5.33422	0.0586	0.0713	1025.28	184.876	20.8684
4	123.96	15.777	5	8	2014	19	16	46	188	20.8077	34.9235	0.0091	0.112	5.36318	0.0569	0.0704	1025.31	186.863	20.772
4	123.96	15.777	5	8	2014	19	16	46	190	20.5678	34.9084	0.0054	0.1121	5.42199	0.0566	0.0704	1025.37	188.85	20.5319
4	123.96	15.777	5	8	2014	19	16	46	192	20.1169	34.8821		0.1119	5.47273	0.0559	0.0704	1025.48	190.837	20.0812
4	123.96	15.777	5	8	2014	19	16	46	194	19.9448	34.875		0.115	5.48387	0.0524	0.071	1025.53	192.823	19.9091
4	123.96	15.777	5	8	2014	19	16	46	196	19.929	34.8751		0.1134	5.48859	0.0526	0.0707	1025.54	194.812	19.8929
4	123.96	15.777	5	8	2014	19	16	46	198	19.9103	34.8751		0.1121	5.4967	0.0532	0.0704	1025.55	196.796	19.8739
4	123.96	15.777	5	8	2014	19	16	46	200	19.8941	34.8741		0.1143	5.48846	0.0535	0.0708	1025.57	198.786	19.8572
4	123.96	15.777	5	8	2014	19	16	46	202	19.8831	34.8738		0.1205	5.48865	0.0523	0.0721	1025.58	200.771	19.8459
4	123.96	15.777	5	8	2014	19	16	46	204	19.8607	34.8726		0.1225	5.48464	0.0525	0.0725	1025.59	202.758	19.8232
4	123.96	15.777	5	8	2014	19	16	46	206	19.8468	34.8719		0.118	5.4771	0.0532	0.0716	1025.6	204.745	19.8089
4	123.96	15.777	5	8	2014	19	16	46	208	19.8183	34.8701		0.1062	5.48368	0.0537	0.0692	1025.62	206.732	19.7801
4	123.96	15.777	5	8	2014	19	16	46	210	19.7468	34.8663		0.1058	5.48623	0.0526	0.0692	1025.64	208.719	19.7083
4	123.96	15.777	5	8	2014	19	16	46	212	19.6579	34.8691		0.1077	5.47794	0.0516	0.0695	1025.68	210.706	19.6192
4	123.96	15.777	5	8	2014	19	16	46	214	19.5104	34.8542		0.1137	5.4847	0.0509	0.0707	1025.71	212.692	19.4715
4	123.96	15.777	5	8	2014	19	16	46	216	19.4411	34.8479		0.1113	5.5312	0.0515	0.0702	1025.73	214.679	19.402
4	123.96	15.777	5	8	2014	19	16	46	218	19.251	34.8345		0.1134	5.55829	0.0526	0.0707	1025.78	216.666	19.2118
4	123.96	15.777	5	8	2014	19	16	46	220	19.1568	34.8279		0.1169	5.58024	0.0504	0.0714	1025.81	218.653	19.1174
4	123.96	15.777	5	8	2014	19	16	46	222	19.0874	34.8259		0.1003	5.61401	0.0503	0.0681	1025.84	220.64	19.0476
4	123.96	15.777	5	8	2014	19	16	46	224	18.9044	34.8185		0.1099	5.6211	0.0504	0.07	1025.89	222.625	18.8646
4	123.96	15.777	5	8	2014	19	16	46	226	18.8566	34.815		0.1118	5.63006	0.0507	0.0703	1025.9	224.612	18.8166
4	123.96	15.777	5	8	2014	19	16	46	228	18.7945	34.8119		0.111	5.63523	0.0498	0.0702	1025.93	226.6	18.7542
4	123.96	15.777	5	8	2014	19	16	46	230	18.7647	34.8105		0.1116	5.6398	0.0508	0.0703	1025.94	228.586	18.724
4	123.96	15.777	5	8	2014	19	16	46	232	18.7365	34.809		0.1134	5.64798	0.0488	0.0707	1025.96	230.572	18.6956
4	123.96	15.777	5	8	2014	19	16	46	234	18.6189	34.8006		0.1121	5.66539	0.0495	0.0704	1025.99	232.56	18.5778
4	123.96	15.777	5	8	2014	19	16	46	236	18.4577	34.7928		0.1129	5.68455	0.0491	0.0706	1026.03	234.545	18.4165
4	123.96	15.777	5	8	2014	19	16	46	238	18.365	34.7844		0.1132	5.69999		0.0706	1026.06	236.531	18.3236
4	123.96	15.777	5	8	2014	19	16	46	240	18.2938	34.7801		0.104	5.69976	0.049	0.0688	1026.08	238.519	18.2521
4	123.96	15.777	5	8	2014	19	16	46	242	18.2306	34.7769		0.1125	5.69831	0.0484	0.0705	1026.1	240.505	18.1887
4	123.96	15.777	5	8	2014	19	16	46	244	18.1904	34.7734		0.1126	5.67924	0.0476	0.0705	1026.12	242.491	18.1482
4	123.96	15.777	5	8	2014	19	16	46	246	18.1717	34.772		0.1081	5.67578	0.0487	0.0696	1026.13	244.479	18.1292
4	123.96	15.777	5	8	2014	19	16	46	248	18.1316	34.7696		0.1016	5.67304	0.0486	0.0683	1026.15	246.464	18.0888
4	123.96	15.777	5	8	2014	19	16	46	250	18.0156	34.7626		0.1057	5.66975	0.0489	0.0691	1026.18	248.45	17.9727
4	123.96	15.777	5	8	2014	19	16	46	252	17.9694	34.7601		0.1036	5.66062	0.0498	0.0687	1026.2	250.437	17.9261
4	123.96	15.777	5	8	2014	19	16	46	254	17.9376	34.7577		0.1071	5.65774	0.0481	0.0694	1026.22	252.423	17.8941
4	123.96	15.777	5	8	2014	19	16	46	256	17.9002	34.7547		0.1014	5.65463	0.0482	0.0683	1026.23	254.41	17.8564
4	123.96	15.777	5	8	2014	19	16	46	258	17.8846	34.7535		0.1058	5.65834	0.0488	0.0692	1026.24	256.396	17.8405
4	123.96	15.777	5	8	2014	19	16	46	260	17.8624	34.7534		0.1039	5.65292	0.0481	0.0688	1026.26	258.383	17.818
4	123.96	15.777	5	8	2014	19	16	46	262	17.8329	34.7554		0.1095	5.64906	0.0479	0.0699	1026.27	260.369	17.7882
4	123.96	15.777	5	8	2014	19	16	46	264	17.8075	34.7553		0.1108	5.62408	0.0488	0.0702	1026.29	262.355	17.7625
4	123.96	15.777	5	8	2014	19	16	46	266	17.7864	34.7548		0.1057	5.59677	0.0485	0.0691	1026.3	264.342	17.7411
4	123.96	15.777	5	8	2014	19	16	46	268	17.7174	34.7499		0.1021	5.58485	0.0488	0.0684	1026.33	266.326	17.6719
4	123.96	15.777	5	8	2014	19	16	46	270	17.5809	34.7414		0.11	5.56876	0.0491	0.07	1026.36	268.315	17.5353
4	123.96	15.777	5	8	2014	19	16	46	272	17.5313	34.7353		0.1111	5.59434	0.0476	0.0702	1026.38	270.298	17.4854
4	123.96	15.777	5	8	2014	19	16	46	274	17.436	34.7271		0.1095	5.61014	0.0483	0.0699	1026.4	272.288	17.39
4	123.96	15.777	5	8	2014	19	16	46	276	17.386	34.7256		0.1075	5.63966	0.0494	0.0695	1026.42	274.272	17.3397
4	123.96	15.777	5	8	2014	19	16	46	278	17.3323	34.7215		0.1067	5.63945	0.0505	0.0693	1026.44	276.259	17.2858
4	123.96	15.777	5	8	2014	19	16	46	280	17.2711	34.7175		0.1062	5.65084	0.0491	0.0692	1026.46	278.244	17.2243
4	123.96	15.777	5	8	2014	19	16	46	282	17.1794	34.7109		0.1078	5.66365	0.0486	0.0696	1026.49	280.231	17.1325
4	123.96	15.777	5	8	2014	19	16	46	284	17.1046	34.7058		0.1108	5.67793	0.0482	0.0702	1026.51	282.217	17.0575
4	123.96	15.777	5	8	2014	19	16	46	286	17.0221	34.6983		0.1053	5.68467	0.0488	0.0691	1026.53	284.203	16.9748
4	123.96	15.777	5	8	2014	19	16	46	288	16.9321	34.6932		0.1072	5.66902	0.0485	0.0694	1026.56	286.189	16.8847
4	123.96	15.777	5	8	2014	19	16	46	290	16.8529	34.6848		0.1067	5.6619	0.0484	0.0693	1026.58	288.175	16.8053
4	123.96	15.777	5	8	2014	19	16	46	292	16.7076	34.6745		0.1094	5.66875	0.0479	0.0699	1026.62	290.162	16.66
4	123.96	15.777	5	8	2014	19	16	46	294	16.577	34.6647		0.1059	5.67006	0.0483	0.0692	1026.65	292.146	16.5293
4	123.96	15.777	5	8	2014	19	16	46	296	16.4996	34.6579		0.1047	5.65408	0.0493	0.0689	1026.67	294.133	16.4518
4	123.96	15.777	5	8	2014	19	16	46	298	16.3867	34.6493		0.1068	5.63785	0.0481	0.0694	1026.7	296.119	16.3387
4	123.96	15.777	5	8	2014	19	16	46	300	16.2864	34.6413		0.1071	5.62409	0.0494	0.0694	1026.73	298.105	16.2383
4	123.96	15.777	5	8	2014	19	16	46	302	16.2009	34.6356		0.105	5.60102	0.0486	0.069	1026.75	300.091	16.1527
4	123.96	15.777	5	8	2014	19	16	46	304	16.1512	34.6316		0.104	5.56881	0.0478	0.0688	1026.77	302.076	16.1028
4	123.96	15.777	5	8	2014	19	16	46	306	16.1181	34.629		0.1118	5.57258	0.0492	0.0704	1026.78	304.063	16.0694
4	123.96	15.777	5	8	2014	19	16	46	308	15.9695	34.6155		0.1038	5.57954	0.0488	0.0688	1026.82	306.048	15.9208
4	123.96	15.777	5	8	2014	19	16	46	310	15.9055	34.612		0.106	5.58883	0.0487	0.0692	1026.84	308.034	15.8566
4	123.96	15.777	5	8	2014	19	16	46	312	15.8719	34.6092		0.1044	5.59805	0.0485	0.0689	1026.85	310.021	15.8228
4	123.96	15.777	5	8	2014	19	16	46	314	15.8469	34.6071		0.1125	5.60125	0.0486	0.0705	1026.87	312.006	15.7975
4	123.96	15.777	5	8	2014	19	16	46	316	15.8183	34.6048		0.1061	5.6107	0.0484	0.0692	1026.88	313.991	15.7687
4	123.96	15.777	5	8	2014	19	16	46	318	15.7153	34.5974		0.1036	5.59655	0.0483	0.0687	1026.91	315.978	15.6656
4	123.96	15.777	5	8	2014	19	16	46	320	15.6346	34.592		0.1076	5.57918	0.0486	0.0695	1026.93	317.963	15.5847
4	123.96	15.777	5	8	2014	19	16	46	322	15.5939	34.5878		0.1083	5.5652	0.049	0.0697	1026.94	319.949	15.5438
4	123.96	15.777	5	8	2014	19	16	46	324	15.5669	34.586		0.1089	5.57251	0.0483	0.0698	1026.96	321.934	15.5166
4	123.96	15.777	5	8	2014	19	16	46	326	15.4691	34.5799		0.1061	5.56965	0.0487	0.0692	1026.98	323.92	15.4187
4	123.96	15.777	5	8	2014	19	16	46	328	15.3906	34.5722		0.1036	5.57417	0.0485	0.0687	1027.01	325.906	15.34
4	123.96	15.777	5	8	2014	19	16	46	330	15.3081	34.5646		0.1068	5.58703	0.0486	0.0694	1027.03	327.892	15.2574
4	123.96	15.777	5	8	2014	19	16	46	332	15.2165	34.5594		0.1048	5.57358	0.049	0.0689	1027.05	329.878	15.1657
4	123.96	15.777	5	8	2014	19	16	46	334	15.0964	34.5488		0.1101	5.5401	0.0488	0.07	1027.08	331.863	15.0456
4	123.96	15.777	5	8	2014	19	16	46	336	15.0407	34.5458		0.1057	5.51076	0.0484	0.0692	1027.1	333.849	14.9897
4	123.96	15.777	5	8	2014	19	16	46	338	14.9204	34.5361		0.1077	5.4761		0.0695	1027.13	335.834	14.8694
4	123.96	15.777	5	8	2014	19	16	46	340	14.7626	34.5259		0.1069	5.44567	0.0494	0.0694	1027.16	337.819	14.7117
4	123.96	15.777	5	8	2014	19	16	46	342	14.7071	34.5217		0.104	5.40748	0.0493	0.0688	1027.18	339.806	14.6559
4	123.96	15.777	5	8	2014	19	16	46	344	14.659	34.5177		0.1052	5.38925	0.0496	0.069	1027.2	341.79	14.6077
4	123.96	15.777	5	8	2014	19	16	46	346	14.5916	34.514		0.1035	5.37362	0.0488	0.0687	1027.22	343.777	14.5401
4	123.96	15.777	5	8	2014	19	16	46	348	14.5536	34.5109		-0.0058	5.34928	0.0478	0.0691	1027.23	345.761	14.5019
4	123.96	15.777	5	8	2014	19	16	46	350	14.5012	34.5072		0.1842		0.0496	0.0678	1027.25	347.764	14.4493
5	124.08	15.874	5	8	2014	22	29	13	4	29.4875	34.4947		-0.3569	4.91516	0.0514	0.0737	1021.54	3.972	29.4865
5	124.08	15.874	5	8	2014	22	29	13	6	29.4737	34.498		0.1439	5.45969	0.0497	0.0748	1021.55	5.967	29.4722
5	124.08	15.874	5	8	2014	22	29	13	8	29.4674	34.4991		0.1315	5.45225	0.0498	0.0743	1021.57	7.955	29.4655
5	124.08	15.874	5	8	2014	22	29	13	10	29.4408	34.5037		-0.1858	5.47175	0.0505	0.0755	1021.59	9.944	29.4383
5	124.08	15.874	5	8	2014	22	29	13	12	29.3439	34.5256		0.1413	5.49069	0.0504	0.0744	1021.64	11.932	29.341
5	124.08	15.874	5	8	2014	22	29	13	14	29.0503	34.6177		0.1265	5.55441	0.0496	0.0733	1021.82	13.921	29.047
5	124.08	15.874	5	8	2014	22	29	13	16	28.7604	34.706		0.1304	5.62759	0.0514	0.0741	1021.99	15.91	28.7566
5	124.08	15.874	5	8	2014	22	29	13	18	28.495	34.7634		0.1333	5.66853	0.0498	0.0746	1022.13	17.899	28.4907
5	124.08	15.874	5	8	2014	22	29	13	20	28.154	34.8428		0.1344	5.73314	0.0517	0.0749	1022.31	19.887	28.1493
5	124.08	15.874	5	8	2014	22	29	13	22	28.0379	34.8708		0.1313	5.74598	0.0508	0.0743	1022.38	21.876	28.0327
5	124.08	15.874	5	8	2014	22	29	13	24	27.9683	34.8705		0.1359	5.74439	0.0512	0.0752	1022.41	23.864	27.9627
5	124.08	15.874	5	8	2014	22	29	13	26	27.9305	34.8712		0.1376	5.74764	0.0519	0.0755	1022.43	25.853	27.9244
5	124.08	15.874	5	8	2014	22	29	13	28	27.9083	34.8727		0.1388	5.74354	0.0515	0.0756	1022.45	27.841	27.9017
5	124.08	15.874	5	8	2014	22	29	13	30	27.9026	34.872		0.0026	5.74776	0.0518	0.0749	1022.46	29.83	27.8956
5	124.08	15.874	5	8	2014	22	29	13	32	27.8516	34.8706		0.1391	5.76516	0.0515	0.0759	1022.48	31.818	27.8441
5	124.08	15.874	5	8	2014	22	29	13	34	27.7749	34.8772		0.1319	5.7815	0.0522	0.0744	1022.52	33.807	27.7669
5	124.08	15.874	5	8	2014	22	29	13	36	27.7397	34.8801		0.1326	5.78769	0.0515	0.0745	1022.54	35.795	27.7313
5	124.08	15.874	5	8	2014	22	29	13	38	27.7067	34.8895		0.1333	5.79084	0.0519	0.0747	1022.57	37.784	27.6978
5	124.08	15.874	5	8	2014	22	29	13	40	27.674	34.8903		0.1362	5.79904	0.0523	0.0752	1022.59	39.773	27.6647
5	124.08	15.874	5	8	2014	22	29	13	42	27.5383	34.884		0.1379	5.83534	0.0519	0.0756	1022.64	41.761	27.5286
5	124.08	15.874	5	8	2014	22	29	13	44	27.353	34.8781		0.1385	5.88885	0.0525	0.0757	1022.7	43.749	27.3428
5	124.08	15.874	5	8	2014	22	29	13	46	27.1317	34.8767		0.1321	5.93466	0.0529		1022.78	45.737	27.1211
5	124.08	15.874	5	8	2014	22	29	13	48	27.0295	34.876		0.144	5.93767	0.0533	0.0768	1022.82	47.726	27.0185
5	124.08	15.874	5	8	2014	22	29	13	50	27.0206	34.8762		0.1353	5.92405	0.0539	0.0751	1022.83	49.715	27.0091
5	124.08	15.874	5	8	2014	22	29	13	52	26.9999	34.8763		0.1437	5.90715	0.0528	0.0767	1022.85	51.702	26.988
5	124.08	15.874	5	8	2014	22	29	13	54	26.9906	34.8766		0.133	5.9153	0.0528	0.0746	1022.86	53.691	26.9782
5	124.08	15.874	5	8	2014	22	29	13	56	26.9629	34.8759		0.1357	5.91367	0.0532	0.0751	1022.88	55.679	26.9501
5	124.08	15.874	5	8	2014	22	29	13	58	26.9214	34.8742		0.1437	5.90106	0.0538	0.0767	1022.9	57.668	26.9082
5	124.08	15.874	5	8	2014	22	29	13	60	26.8827	34.8727		0.1408	5.82261	0.054	0.0762	1022.92	59.655	26.869
5	124.08	15.874	5	8	2014	22	29	13	62	26.8184	34.8685		0.1416	5.77175	0.0538	0.0763	1022.94	61.644	26.8043
5	124.08	15.874	5	8	2014	22	29	13	64	26.771	34.8672		0.1385	5.80714	0.0544	0.0757	1022.97	63.632	26.7564
5	124.08	15.874	5	8	2014	22	29	13	66	26.7442	34.8666		0.1344	5.82587	0.0552	0.0749	1022.98	65.62	26.7292
5	124.08	15.874	5	8	2014	22	29	13	68	26.714	34.8674	0.0112	0.1474	5.83418	0.0571	0.0775	1023	67.608	26.6985
5	124.08	15.874	5	8	2014	22	29	13	70	26.703	34.8693	0.0165	0.1371	5.83144	0.0577	0.0754	1023.01	69.597	26.6871
5	124.08	15.874	5	8	2014	22	29	13	72	26.6721	34.8718	0.012	0.14	5.83079	0.0572	0.076	1023.03	71.585	26.6557
5	124.08	15.874	5	8	2014	22	29	13	74	26.6641	34.8737	0.0059	0.1406	5.84357	0.0566	0.0761	1023.05	73.573	26.6473
5	124.08	15.874	5	8	2014	22	29	13	76	26.6375	34.8737	0.001	0.1387	5.83737	0.0561	0.0757	1023.06	75.561	26.6202
5	124.08	15.874	5	8	2014	22	29	13	78	26.591	34.8728	0.0075	0.1399	5.82627	0.0567	0.076	1023.09	77.549	26.5733
5	124.08	15.874	5	8	2014	22	29	13	80	26.4907	34.8769	0.0044	0.1422	5.81669	0.0564	0.0764	1023.13	79.537	26.4726
5	124.08	15.874	5	8	2014	22	29	13	82	26.4218	34.8807	0.0067	0.1418	5.81651	0.0567	0.0764	1023.16	81.525	26.4033
5	124.08	15.874	5	8	2014	22	29	13	84	26.2935	34.8813	0.0122	0.145	5.81191	0.0572	0.077	1023.21	83.513	26.2746
5	124.08	15.874	5	8	2014	22	29	13	86	26.0814	34.8812	0.0286	0.1417	5.80114	0.0588	0.0763	1023.29	85.501	26.0622
5	124.08	15.874	5	8	2014	22	29	13	88	26.0365	34.8821	0.0222	0.142	5.78568	0.0582	0.0764	1023.31	87.489	26.0168
5	124.08	15.874	5	8	2014	22	29	13	90	26.0164	34.8841	0.036	0.1432	5.77737	0.0596	0.0766	1023.33	89.477	25.9963
5	124.08	15.874	5	8	2014	22	29	13	92	25.9909	34.888	0.0613	0.1413	5.75619	0.0621	0.0762	1023.35	91.465	25.9704
5	124.08	15.874	5	8	2014	22	29	13	94	25.9829	34.8893	0.0726	0.1427	5.73066	0.0633	0.0765	1023.36	93.454	25.962
5	124.08	15.874	5	8	2014	22	29	13	96	25.93	34.8897	0.0889	0.1403	5.72283	0.0649	0.0761	1023.38	95.44	25.9087
5	124.08	15.874	5	8	2014	22	29	13	98	25.8429	34.8849	0.0702	0.1382	5.72385	0.063	0.0756	1023.42	97.428	25.8212
5	124.08	15.874	5	8	2014	22	29	13	100	25.7808	34.8812	0.0608	0.1364	5.72256	0.0621	0.0753	1023.44	99.416	25.7587
5	124.08	15.874	5	8	2014	22	29	13	102	25.7147	34.8806	0.0481	0.1454	5.72222	0.0608	0.0771	1023.47	101.404	25.6922
5	124.08	15.874	5	8	2014	22	29	13	104	25.5573	34.8814	0.0647	0.1444	5.68877	0.0625	0.0769	1023.53	103.392	25.5344
5	124.08	15.874	5	8	2014	22	29	13	106	25.4865	34.8854	0.0893	0.1406	5.67087	0.0649	0.0761	1023.56	105.38	25.4632
5	124.08	15.874	5	8	2014	22	29	13	108	25.4296	34.8932	0.1252	0.1432	5.62096	0.0685	0.0766	1023.59	107.367	25.4059
5	124.08	15.874	5	8	2014	22	29	13	110	25.3314	34.8958	0.1491	0.1429	5.60496	0.0709	0.0766	1023.63	109.356	25.3073
5	124.08	15.874	5	8	2014	22	29	13	112	25.2228	34.9035	0.1779	0.1413	5.57798	0.0738	0.0763	1023.68	111.343	25.1983
5	124.08	15.874	5	8	2014	22	29	13	114	25.1548	34.909	0.1989	0.1418	5.54978	0.0759	0.0763	1023.72	113.332	25.13
5	124.08	15.874	5	8	2014	22	29	13	116	25.1311	34.9115	0.2123	0.1441	5.51847	0.0772	0.0768	1023.73	115.317	25.1058
5	124.08	15.874	5	8	2014	22	29	13	118	25.0904	34.9145	0.2165	0.1416	5.51134	0.0777	0.0763	1023.76	117.306	25.0647
5	124.08	15.874	5	8	2014	22	29	13	120	25.0311	34.9182	0.2551	0.1408	5.48823	0.0815	0.0761	1023.79	119.294	25.005
5	124.08	15.874	5	8	2014	22	29	13	122	24.9785	34.9227	0.1927	0.1385	5.46719	0.0811	0.0757	1023.82	121.281	24.9521
5	124.08	15.874	5	8	2014	22	29	13	124	24.9671	34.9252	0.2117	0.1389	5.45297	0.085	0.0758	1023.83	123.269	24.9402
5	124.08	15.874	5	8	2014	22	29	13	126	24.9564	34.9275	0.3085	0.1406	5.44359	0.0869	0.0761	1023.84	125.257	24.9292
5	124.08	15.874	5	8	2014	22	29	13	128	24.911	34.9306	0.291	0.1378	5.43304	0.0851	0.0756	1023.87	127.244	24.8833
5	124.08	15.874	5	8	2014	22	29	13	130	24.8305	34.9333	0.3186	-0.005	5.41303	0.0879	0.0758	1023.9	129.233	24.8025
5	124.08	15.874	5	8	2014	22	29	13	132	24.6204	34.9507	0.3347	0.1101	5.39482	0.0895	0.075	1023.99	131.22	24.5921
5	124.08	15.874	5	8	2014	22	29	13	134	24.1883	34.9773	0.2959	0.142	5.34979	0.0856	0.0765	1024.15	133.206	24.1599
5	124.08	15.874	5	8	2014	22	29	13	136	23.793	34.9907	0.2566	-0.0421	5.28725	0.0816	0.0773	1024.28	135.195	23.7645
5	124.08	15.874	5	8	2014	22	29	13	138	23.6263	35.0001	0.2505	0.1516	5.23624	0.0811	0.0776	1024.35	137.182	23.5976
5	124.08	15.874	5	8	2014	22	29	13	140	23.4562	35.0053	0.2468	0.1472	5.19972	0.0807	0.0774	1024.41	139.169	23.4272
5	124.08	15.874	5	8	2014	22	29	13	142	23.3019	34.9993	0.2234	0.1459	5.18939	0.0783	0.0772	1024.46	141.157	23.2727
5	124.08	15.874	5	8	2014	22	29	13	144	23.0962	34.9964	0.1953	0.1463	5.18857	0.0755	0.0773	1024.53	143.144	23.0667
5	124.08	15.874	5	8	2014	22	29	13	146	22.8317	34.994	0.1925	0.1441	5.18714	0.0753	0.0768	1024.61	145.132	22.802
5	124.08	15.874	5	8	2014	22	29	13	148	22.6276	34.9957	0.1516	0.1415	5.1773	0.0712	0.0763	1024.68	147.119	22.5977
5	124.08	15.874	5	8	2014	22	29	13	150	22.3168	34.9893	0.1378	0.1409	5.19492	0.0698	0.0762	1024.77	149.107	22.2868
5	124.08	15.874	5	8	2014	22	29	13	152	21.7051	34.9573	0.0461	0.1457	5.24224	0.0669	0.0771	1024.93	151.094	21.6753
5	124.08	15.874	5	8	2014	22	29	13	154	21.6743	34.956	0.1092	0.1332	5.23679	0.0671	0.0746	1024.94	153.081	21.6442
5	124.08	15.874	5	8	2014	22	29	13	156	21.6498	34.9536	0.0839	0.1398	5.23713	0.0644	0.0759	1024.96	155.069	21.6193
5	124.08	15.874	5	8	2014	22	29	13	158	21.6131	34.9489	0.0828	-0.2705	5.24276	0.0643	0.075	1024.97	157.056	21.5823
5	124.08	15.874	5	8	2014	22	29	13	160	21.497	34.9387	0.08	0.1244	5.25901	0.064	0.0752	1025.01	159.043	21.4659
5	124.08	15.874	5	8	2014	22	29	13	162	21.4323	34.9347	0.0706	0.1397	5.27547	0.0631	0.0759	1025.03	161.03	21.4009
5	124.08	15.874	5	8	2014	22	29	13	164	21.3664	34.9306	0.0728	0.1422	5.29337	0.0633	0.0764	1025.05	163.017	21.3346
5	124.08	15.874	5	8	2014	22	29	13	166	21.0657	34.9268	0.0594	0.1414	5.3145	0.062	0.0763	1025.14	165.005	21.0339
5	124.08	15.874	5	8	2014	22	29	13	168	20.956	34.9362	0.0571	0.139	5.29669	0.0617	0.0758	1025.19	166.992	20.9239
5	124.08	15.874	5	8	2014	22	29	13	170	20.871	34.9392	0.0377	0.1367	5.28646	0.0598	0.0753	1025.22	168.979	20.8387
5	124.08	15.874	5	8	2014	22	29	13	172	20.7087	34.9354	0.0263	0.1365	5.28461	0.0586	0.0753	1025.27	170.967	20.6762
5	124.08	15.874	5	8	2014	22	29	13	174	20.6242	34.9321	0.0146	0.1359	5.28683	0.0575	0.0752	1025.3	172.953	20.5913
5	124.08	15.874	5	8	2014	22	29	13	176	20.5148	34.9259	0.0061	0.1334	5.30114	0.0566	0.0747	1025.33	174.94	20.4816
5	124.08	15.874	5	8	2014	22	29	13	178	20.34	34.9124	0.0011	0.1331	5.32569	0.0561	0.0746	1025.38	176.928	20.3067
5	124.08	15.874	5	8	2014	22	29	13	180	20.1317	34.8964		0.1317	5.3737	0.0539	0.0744	1025.43	178.915	20.0983
5	124.08	15.874	5	8	2014	22	29	13	182	19.8208	34.8709		0.1293	5.4304	0.0522	0.0739	1025.5	180.902	19.7874
5	124.08	15.874	5	8	2014	22	29	13	184	19.7246	34.8649		0.13	5.44935	0.052	0.074	1025.53	182.889	19.6909
5	124.08	15.874	5	8	2014	22	29	13	186	19.7156	34.8654		0.1282	5.45134	0.0522	0.0736	1025.55	184.876	19.6816
5	124.08	15.874	5	8	2014	22	29	13	188	19.7103	34.8651		0.1293	5.45421	0.0521	0.0739	1025.56	186.863	19.6759
5	124.08	15.874	5	8	2014	22	29	13	190	19.6919	34.8627		0.1309	5.45449	0.0517	0.0742	1025.57	188.85	19.6571
5	124.08	15.874	5	8	2014	22	29	13	192	19.6052	34.8546		0.1294	5.47056	0.0516	0.0739	1025.59	190.837	19.5702
5	124.08	15.874	5	8	2014	22	29	13	194	19.5359	34.8482		0.1375	5.48886	0.0522	0.0755	1025.61	192.824	19.5007
5	124.08	15.874	5	8	2014	22	29	13	196	19.3476	34.8319		0.1339	5.52958	0.0522	0.0748	1025.66	194.811	19.3122
5	124.08	15.874	5	8	2014	22	29	13	198	19.1055	34.8195		0.1263	5.56708	0.0512	0.0733	1025.72	196.798	19.0701
5	124.08	15.874	5	8	2014	22	29	13	200	19.1045	34.8227		0.1343	5.57544	0.0506	0.0749	1025.73	198.785	19.0688
5	124.08	15.874	5	8	2014	22	29	13	202	19.0491	34.8198		0.1266	5.58916	0.0503	0.0734	1025.75	200.772	19.013
5	124.08	15.874	5	8	2014	22	29	13	204	18.8032	34.8128		0.1331	5.59462	0.0498	0.0746	1025.82	202.758	18.7671
5	124.08	15.874	5	8	2014	22	29	13	206	18.7896	34.8139		0.1286	5.59083	0.0497	0.0737	1025.83	204.745	18.7532
5	124.08	15.874	5	8	2014	22	29	13	208	18.7877	34.8148		0.1329	5.58867	0.0498	0.0746	1025.84	206.732	18.7509
5	124.08	15.874	5	8	2014	22	29	13	210	18.7798	34.8145		0.1275	5.57486	0.0495	0.0735	1025.85	208.719	18.7427
5	124.08	15.874	5	8	2014	22	29	13	212	18.7613	34.8126		0.1277	5.57622	0.0501	0.0736	1025.87	210.706	18.7238
5	124.08	15.874	5	8	2014	22	29	13	214	18.7457	34.8111		0.1299	5.57627	0.0499	0.074	1025.88	212.692	18.7079
5	124.08	15.874	5	8	2014	22	29	13	216	18.6725	34.7994		0.126	5.59668	0.0498	0.0732	1025.9	214.679	18.6345
5	124.08	15.874	5	8	2014	22	29	13	218	18.517	34.7811		0.131	5.6664	0.0492	0.0742	1025.93	216.666	18.4788
5	124.08	15.874	5	8	2014	22	29	13	220	18.4119	34.7734		0.1245	5.7123	0.0492	0.0729	1025.96	218.653	18.3735
5	124.08	15.874	5	8	2014	22	29	13	222	18.4002	34.7732		0.1265	5.73123	0.0484	0.0733	1025.97	220.639	18.3615
5	124.08	15.874	5	8	2014	22	29	13	224	18.3005	34.7672		0.1245	5.74934	0.0489	0.0729	1026	222.626	18.2616
5	124.08	15.874	5	8	2014	22	29	13	226	18.1796	34.7634		0.1296	5.76143	0.0486	0.074	1026.04	224.612	18.1406
5	124.08	15.874	5	8	2014	22	29	13	228	18.1338	34.7634		0.121	5.75356	0.0491	0.0722	1026.06	226.599	18.0945
5	124.08	15.874	5	8	2014	22	29	13	230	18.0567	34.7567		0.1228	5.76421	0.0485	0.0726	1026.08	228.586	18.0171
5	124.08	15.874	5	8	2014	22	29	13	232	17.9626	34.7512		0.1265	5.78144	0.0492	0.0734	1026.11	230.572	17.9229
5	124.08	15.874	5	8	2014	22	29	13	234	17.9449	34.7532		0.1256	5.77727	0.0491	0.0731	1026.12	232.559	17.9048
5	124.08	15.874	5	8	2014	22	29	13	236	17.9468	34.757		0.1232	5.75004	0.049	0.0726	1026.13	234.545	17.9064
5	124.08	15.874	5	8	2014	22	29	13	238	17.9423	34.7576		0.1228	5.72544	0.0489	0.0726	1026.14	236.532	17.9015
5	124.08	15.874	5	8	2014	22	29	13	240	17.9367	34.7585		0.1243	5.70715	0.0488	0.0729	1026.16	238.519	17.8956
5	124.08	15.874	5	8	2014	22	29	13	242	17.9021	34.7561		0.1218	5.6941	0.0498	0.0724	1026.17	240.505	17.8607
5	124.08	15.874	5	8	2014	22	29	13	244	17.864	34.7498		0.1293	5.6991	0.0488	0.0738	1026.18	242.492	17.8224
5	124.08	15.874	5	8	2014	22	29	13	246	17.8302	34.7487		0.1223	5.72623	0.0492	0.0725	1026.2	244.478	17.7882
5	124.08	15.874	5	8	2014	22	29	13	248	17.7439	34.7463		0.1272	5.69366	0.0491	0.0735	1026.23	246.465	17.7018
5	124.08	15.874	5	8	2014	22	29	13	250	17.6103	34.7375		0.1186	5.6839	0.0487	0.0717	1026.26	248.45	17.5681
5	124.08	15.874	5	8	2014	22	29	13	252	17.4997	34.7308		0.1297	5.67687	0.0491	0.074	1026.29	250.437	17.4572
5	124.08	15.874	5	8	2014	22	29	13	254	17.4393	34.7272		0.1253	5.66074	0.0484	0.0731	1026.32	252.423	17.3966
5	124.08	15.874	5	8	2014	22	29	13	256	17.355	34.7203		0.1246	5.66798	0.0493	0.0729	1026.34	254.41	17.3122
5	124.08	15.874	5	8	2014	22	29	13	258	17.2411	34.7131		0.1317	5.66109	0.0498	0.0744	1026.37	256.396	17.1981
5	124.08	15.874	5	8	2014	22	29	13	260	17.17	34.7078		0.1267	5.66572	0.0491	0.0733	1026.39	258.383	17.1268
5	124.08	15.874	5	8	2014	22	29	13	262	17.0843	34.7014		0.1268	5.67875	0.0488	0.0734	1026.42	260.369	17.041
5	124.08	15.874	5	8	2014	22	29	13	264	17.0304	34.6977		0.127	5.69056	0.0486	0.0734	1026.44	262.355	16.9868
5	124.08	15.874	5	8	2014	22	29	13	266	16.9362	34.69		0.1248	5.68981	0.0493	0.0729	1026.46	264.342	16.8924
5	124.08	15.874	5	8	2014	22	29	13	268	16.7853	34.6792		0.1245	5.66813	0.0484	0.0729	1026.5	266.328	16.7415
5	124.08	15.874	5	8	2014	22	29	13	270	16.711	34.6731		0.1183	5.65577	0.0491	0.0716	1026.52	268.314	16.667
5	124.08	15.874	5	8	2014	22	29	13	272	16.6418	34.6697		0.1217	5.64886	0.0487	0.0723	1026.54	270.3	16.5975
5	124.08	15.874	5	8	2014	22	29	13	274	16.6385	34.6699		0.1277	5.6297	0.0488	0.0736	1026.55	272.286	16.594
5	124.08	15.874	5	8	2014	22	29	13	276	16.5964	34.6657		0.1287	5.62302	0.0475	0.0738	1026.57	274.273	16.5516
5	124.08	15.874	5	8	2014	22	29	13	278	16.497	34.6577		0.1203	5.59613	0.0494	0.072	1026.59	276.259	16.4521
5	124.08	15.874	5	8	2014	22	29	13	280	16.4347	34.6524		0.1218	5.57836	0.0495	0.0723	1026.61	278.245	16.3896
5	124.08	15.874	5	8	2014	22	29	13	282	16.3223	34.6432		0.1299	5.56502	0.0487	0.0739	1026.64	280.231	16.277
5	124.08	15.874	5	8	2014	22	29	13	284	16.2407	34.6362		0.1224	5.58446	0.0487	0.0725	1026.66	282.217	16.1953
5	124.08	15.874	5	8	2014	22	29	13	286	15.866	34.6054		0.1233	5.55924	0.0484	0.0727	1026.74	284.203	15.821
5	124.08	15.874	5	8	2014	22	29	13	288	15.6905	34.5939		0.1325	5.55315	0.0483	0.0745	1026.78	286.189	15.6455
5	124.08	15.874	5	8	2014	22	29	13	290	15.583	34.5867		0.1264	5.54449	0.0485	0.0733	1026.81	288.176	15.5379
5	124.08	15.874	5	8	2014	22	29	13	292	15.4596	34.5777		0.1242	5.5339	0.0487	0.0728	1026.84	290.161	15.4145
5	124.08	15.874	5	8	2014	22	29	13	294	15.3682	34.5715		0.1231	5.51367	0.0478	0.0726	1026.86	292.147	15.3229
5	124.08	15.874	5	8	2014	22	29	13	296	15.2561	34.5631		0.1236	5.50715	0.0479	0.0727	1026.89	294.133	15.2107
5	124.08	15.874	5	8	2014	22	29	13	298	15.1043	34.5525		0.1284	5.47862	0.0478	0.0737	1026.92	296.119	15.059
5	124.08	15.874	5	8	2014	22	29	13	300	15.0799	34.5519		0.1209	5.46218	0.0491	0.0722	1026.94	298.105	15.0343
5	124.08	15.874	5	8	2014	22	29	13	302	15.0549	34.5502		0.1235	5.45153	0.0492	0.0727	1026.95	300.091	15.0091
5	124.08	15.874	5	8	2014	22	29	13	304	14.9956	34.5457		0.1273	5.44061	0.0486	0.0734	1026.97	302.077	14.9496
5	124.08	15.874	5	8	2014	22	29	13	306	14.9742	34.5441		0.1236	5.41758	0.0477	0.0727	1026.98	304.063	14.9279
5	124.08	15.874	5	8	2014	22	29	13	308	14.9381	34.5413		0.1269	5.38908	0.0485	0.0734	1027	306.048	14.8916
5	124.08	15.874	5	8	2014	22	29	13	310	14.8972	34.5379		0.1288	5.3675	0.0482	0.0738	1027.01	308.034	14.8505
5	124.08	15.874	5	8	2014	22	29	13	312	14.8464	34.5335		0.1279	5.35804	0.0493	0.0736	1027.03	310.02	14.7995
5	124.08	15.874	5	8	2014	22	29	13	314	14.7935	34.5293		0.1276	5.34699	0.0501	0.0735	1027.05	312.006	14.7465
5	124.08	15.874	5	8	2014	22	29	13	316	14.7149	34.5252		0.1225	5.34589	0.0489	0.0725	1027.07	313.992	14.6677
5	124.08	15.874	5	8	2014	22	29	13	318	14.6895	34.5252		0.1246	5.3786	0.0492	0.0729	1027.08	315.978	14.6421
5	124.08	15.874	5	8	2014	22	29	13	320	14.5948	34.5178		0.1236	5.39929	0.0477	0.0727	1027.11	317.963	14.5472
5	124.08	15.874	5	8	2014	22	29	13	322	14.4937	34.5113		0.1286	5.39005	0.0493	0.0737	1027.13	319.949	14.446
5	124.08	15.874	5	8	2014	22	29	13	324	14.4666	34.5099		0.12	5.38869	0.0483	0.072	1027.15	321.935	14.4187
5	124.08	15.874	5	8	2014	22	29	13	326	14.4431	34.5085		0.1278	5.38321	0.0481	0.0736	1027.16	323.92	14.3949
5	124.08	15.874	5	8	2014	22	29	13	328	14.4155	34.507		0.1237	5.36456	0.0487	0.0727	1027.17	325.906	14.3671
5	124.08	15.874	5	8	2014	22	29	13	330	14.4061	34.5064		0.1199	5.3514	0.0483	0.072	1027.18	327.892	14.3575
5	124.08	15.874	5	8	2014	22	29	13	332	14.3428	34.5015		0.1285	5.34195	0.0489	0.0737	1027.2	329.878	14.294
5	124.08	15.874	5	8	2014	22	29	13	334	14.2986	34.4988		0.1271	5.32757	0.0489	0.0734	1027.22	331.863	14.2496
5	124.08	15.874	5	8	2014	22	29	13	336	14.2729	34.4969		0.1283	5.32214		0.0737	1027.23	333.849	14.2237
5	124.08	15.874	5	8	2014	22	29	13	338	14.2399	34.4945		0.126	5.31413	0.0482	0.0732	1027.25	335.834	14.1905
5	124.08	15.874	5	8	2014	22	29	13	340	14.1108	34.4845		0.1321	5.31466	0.0493	0.0744	1027.27	337.82	14.0614
5	124.08	15.874	5	8	2014	22	29	13	342	13.9922	34.476		0.1281	5.31825	0.0497	0.0737	1027.3	339.805	13.9428
5	124.08	15.874	5	8	2014	22	29	13	344	13.8507	34.4668		0.1298	5.3138	0.0481	0.074	1027.33	341.791	13.8013
5	124.08	15.874	5	8	2014	22	29	13	346	13.7129	34.4566		0.1324	5.30606	0.0503	0.0745	1027.37	343.776	13.6636
5	124.08	15.874	5	8	2014	22	29	13	348	13.5776	34.4474		0.1344	5.2812	0.0495	0.0749	1027.4	345.765	13.5283
6	124.22	15.982	5	9	2014	1	55	7	4	29.5908	34.7122		0.1372	4.72058	0.0498	0.0755	1021.67	3.977	29.5898
6	124.22	15.982	5	9	2014	1	55	7	6	29.5904	34.7179		0.1263	5.50249	0.0515	0.0733	1021.68	5.965	29.589
6	124.22	15.982	5	9	2014	1	55	7	8	29.5632	34.7215		0.1283	5.5027	0.0505	0.0737	1021.7	7.955	29.5612
6	124.22	15.982	5	9	2014	1	55	7	10	29.5441	34.7222		0.1276	5.50515	0.0514	0.0735	1021.72	9.944	29.5417
6	124.22	15.982	5	9	2014	1	55	7	12	29.5325	34.7205		0.1303	5.50489	0.0521	0.0741	1021.73	11.932	29.5295
6	124.22	15.982	5	9	2014	1	55	7	14	29.517	34.717		0.1302	5.51145	0.0513	0.0741	1021.74	13.921	29.5136
6	124.22	15.982	5	9	2014	1	55	7	16	29.5104	34.7159		0.1262	5.50643	0.0505	0.0733	1021.75	15.909	29.5065
6	124.22	15.982	5	9	2014	1	55	7	18	29.4939	34.7116		0.1238	5.49925	0.0505	0.0728	1021.76	17.899	29.4895
6	124.22	15.982	5	9	2014	1	55	7	20	29.4497	34.6993		0.1245	5.5108	0.0509	0.0729	1021.77	19.887	29.4448
6	124.22	15.982	5	9	2014	1	55	7	22	29.3958	34.6926		0.1285	5.52632	0.0517	0.0737	1021.79	21.875	29.3904
6	124.22	15.982	5	9	2014	1	55	7	24	29.281	34.7052		0.1241	5.54008	0.0509	0.0728	1021.85	23.865	29.2752
6	124.22	15.982	5	9	2014	1	55	7	26	29.1292	34.733		0.1263	5.59153	0.052	0.0733	1021.93	25.853	29.1229
6	124.22	15.982	5	9	2014	1	55	7	28	28.9352	34.7297		0.1315	5.65952	0.0516	0.0742	1022	27.841	28.9285
6	124.22	15.982	5	9	2014	1	55	7	30	28.3417	34.7506		0.1263	5.72779	0.0517	0.0733	1022.22	29.83	28.3346
6	124.22	15.982	5	9	2014	1	55	7	32	28.2503	34.7571		0.1311	5.77625	0.0509	0.0742	1022.27	31.818	28.2428
6	124.22	15.982	5	9	2014	1	55	7	34	28.1881	34.7613		0.131	5.78675	0.051	0.0742	1022.3	33.807	28.18
6	124.22	15.982	5	9	2014	1	55	7	36	28.148	34.7703			5.76301	0.0518		1022.33	35.796	28.1395
6	124.22	15.982	5	9	2014	1	55	7	38	28.1278	34.7795		0.1263	5.75302	0.0508	0.0733	1022.35	37.784	28.1188
6	124.22	15.982	5	9	2014	1	55	7	40	28.0876	34.7951		0.1319	5.75633	0.0513	0.0744	1022.38	39.772	28.0781
6	124.22	15.982	5	9	2014	1	55	7	42	28.04	34.804		0.122	5.7616	0.0516	0.0724	1022.41	41.761	28.0301
6	124.22	15.982	5	9	2014	1	55	7	44	27.982	34.8197		0.1298	5.77903	0.0516	0.074	1022.45	43.749	27.9717
6	124.22	15.982	5	9	2014	1	55	7	46	27.8744	34.8319		0.1258	5.7903	0.0513	0.0732	1022.51	45.738	27.8636
6	124.22	15.982	5	9	2014	1	55	7	48	27.8514	34.8489		0.1306	5.77588	0.0513	0.0741	1022.54	47.726	27.8401
6	124.22	15.982	5	9	2014	1	55	7	50	27.8493	34.8575		0.1422	5.77106	0.0528	0.0764	1022.55	49.714	27.8376
6	124.22	15.982	5	9	2014	1	55	7	52	27.8277	34.8677		0.125	5.77366	0.052	0.073	1022.57	51.702	27.8155
6	124.22	15.982	5	9	2014	1	55	7	54	27.785	34.8713		0.1298	5.77382	0.053	0.074	1022.6	53.691	27.7723
6	124.22	15.982	5	9	2014	1	55	7	56	27.7594	34.8836		0.1375	5.77003	0.0539	0.0755	1022.63	55.679	27.7463
6	124.22	15.982	5	9	2014	1	55	7	58	27.7395	34.8822		0.1316	5.64256	0.0537	0.0743	1022.64	57.667	27.7259
6	124.22	15.982	5	9	2014	1	55	7	60	27.6912	34.8755		0.1327	5.5854	0.0536	0.0746	1022.66	59.656	27.6772
6	124.22	15.982	5	9	2014	1	55	7	62	27.6639	34.8756		0.138	5.77528	0.0529	0.0756	1022.68	61.644	27.6495
6	124.22	15.982	5	9	2014	1	55	7	64	27.5761	34.876		0.1313	5.79193	0.053	0.0742	1022.71	63.632	27.5613
6	124.22	15.982	5	9	2014	1	55	7	66	27.4929	34.8751		0.133	5.80732		0.0746	1022.75	65.621	27.4775
6	124.22	15.982	5	9	2014	1	55	7	68	27.4506	34.882		0.1386	5.81624	0.0532	0.0757	1022.78	67.608	27.4348
6	124.22	15.982	5	9	2014	1	55	7	70	27.424	34.8875		0.1429	5.81918	0.0532	0.0766	1022.8	69.597	27.4078
6	124.22	15.982	5	9	2014	1	55	7	72	27.3601	34.8841		0.1247	5.84309	0.0542	0.0729	1022.82	71.583	27.3434
6	124.22	15.982	5	9	2014	1	55	7	74	27.3399	34.8833		0.1322	5.82752	0.0531	0.0745	1022.84	73.573	27.3228
6	124.22	15.982	5	9	2014	1	55	7	76	27.2876	34.88		0.1351	5.83768	0.053	0.075	1022.86	75.561	27.2701
6	124.22	15.982	5	9	2014	1	55	7	78	27.2714	34.8808		0.1367	5.8355	0.0539	0.0753	1022.88	77.548	27.2534
6	124.22	15.982	5	9	2014	1	55	7	80	27.2594	34.8807		0.1352	5.85223	0.0544	0.0751	1022.89	79.537	27.2409
6	124.22	15.982	5	9	2014	1	55	7	82	27.2411	34.8788		0.1367	5.83462	0.0544	0.0754	1022.9	81.525	27.2222
6	124.22	15.982	5	9	2014	1	55	7	84	27.1949	34.8754		0.1336	5.83651	0.0531	0.0747	1022.92	83.513	27.1755
6	124.22	15.982	5	9	2014	1	55	7	86	27.1289	34.8748		0.1337	5.8434	0.0536	0.0748	1022.95	85.501	27.1091
6	124.22	15.982	5	9	2014	1	55	7	88	27.065	34.8819		0.1333	5.82496	0.0526	0.0747	1022.99	87.489	27.0447
6	124.22	15.982	5	9	2014	1	55	7	90	27.0031	34.9084		0.1363	5.84625	0.0547	0.0753	1023.03	89.477	26.9825
6	124.22	15.982	5	9	2014	1	55	7	92	26.8784	34.9108		0.132	5.83594	0.0545	0.0744	1023.08	91.465	26.8574
6	124.22	15.982	5	9	2014	1	55	7	94	26.8082	34.9093	0.0079	0.133	5.83637	0.0568	0.0746	1023.11	93.453	26.7867
6	124.22	15.982	5	9	2014	1	55	7	96	26.7014	34.8964	0.0094	0.1305	5.83857	0.0569	0.0741	1023.15	95.441	26.6795
6	124.22	15.982	5	9	2014	1	55	7	98	26.6064	34.8938	0.0233	0.1412	5.82166	0.0583	0.0762	1023.18	97.428	26.5842
6	124.22	15.982	5	9	2014	1	55	7	100	26.5497	34.8894	0.0137	0.1386	5.8274	0.0574	0.0757	1023.21	99.417	26.527
6	124.22	15.982	5	9	2014	1	55	7	102	26.4369	34.8847	0.0215	0.136	5.80436	0.0582	0.0752	1023.25	101.404	26.4139
6	124.22	15.982	5	9	2014	1	55	7	104	26.4004	34.8879	0.0341	0.141	5.81446	0.0594	0.0762	1023.27	103.392	26.377
6	124.22	15.982	5	9	2014	1	55	7	106	26.3714	34.8907	0.0073	0.1349	5.82131	0.0567	0.075	1023.29	105.38	26.3475
6	124.22	15.982	5	9	2014	1	55	7	108	26.34	34.8906	0.0411	0.1341	5.81045	0.0602	0.0748	1023.31	107.367	26.3157
6	124.22	15.982	5	9	2014	1	55	7	110	26.2817	34.8854	0.0284	0.1334	5.79228	0.0588	0.0747	1023.33	109.356	26.257
6	124.22	15.982	5	9	2014	1	55	7	112	26.2487	34.8815	0.0187	0.132	5.77315	0.0579	0.0744	1023.35	111.343	26.2235
6	124.22	15.982	5	9	2014	1	55	7	114	26.1859	34.8794	0.0232	0.1377	5.76802	0.0583	0.0755	1023.37	113.331	26.1603
6	124.22	15.982	5	9	2014	1	55	7	116	26.0718	34.8821	0.0277	0.1342	5.72305	0.0588	0.0749	1023.42	115.319	26.0459
6	124.22	15.982	5	9	2014	1	55	7	118	26.0495	34.8832	0.0299	0.1371	5.71558	0.059	0.0754	1023.44	117.306	26.0232
6	124.22	15.982	5	9	2014	1	55	7	120	25.9324	34.8786	0.0271	0.1356	5.71976	0.0587	0.0752	1023.48	119.294	25.9056
6	124.22	15.982	5	9	2014	1	55	7	122	25.861	34.8782	0.0484	0.1355	5.67152	0.0609	0.0751	1023.51	121.282	25.8339
6	124.22	15.982	5	9	2014	1	55	7	124	25.845	34.8818	0.0309	0.1338	5.69664	0.0591	0.0748	1023.53	123.268	25.8174
6	124.22	15.982	5	9	2014	1	55	7	126	25.7254	34.8755	0.0461	0.14	5.70678	0.0606	0.076	1023.57	125.257	25.6975
6	124.22	15.982	5	9	2014	1	55	7	128	25.5431	34.869	0.0734	0.1375	5.70333	0.0634	0.0755	1023.63	127.244	25.5149
6	124.22	15.982	5	9	2014	1	55	7	130	25.3831	34.8736	0.0791	0.1334	5.66851	0.0639	0.0747	1023.69	129.232	25.3546
6	124.22	15.982	5	9	2014	1	55	7	132	25.2084	34.9044	0.1431	0.1315	5.58054	0.0703	0.0743	1023.77	131.22	25.1796
6	124.22	15.982	5	9	2014	1	55	7	134	25.1283	34.954	0.3867	0.1249	5.38121	0.0947	0.073	1023.84	133.206	25.0992
6	124.22	15.982	5	9	2014	1	55	7	136	25.061	34.9594	0.3593	0.1298	5.31874	0.0919	0.074	1023.88	135.195	25.0314
6	124.22	15.982	5	9	2014	1	55	7	138	24.7387	34.9566	0.3247	0.1304	5.27874	0.0885	0.0741	1023.98	137.182	24.709
6	124.22	15.982	5	9	2014	1	55	7	140	24.5227	34.9513	0.2707	0.1381	5.2655	0.083	0.0756	1024.05	139.169	24.4927
6	124.22	15.982	5	9	2014	1	55	7	142	24.4454	34.9477	0.2596	0.1391	5.26389	0.0819	0.0758	1024.08	141.157	24.4151
6	124.22	15.982	5	9	2014	1	55	7	144	24.1688	34.9442	0.2586	0.1356	5.27089	0.0818	0.0751	1024.17	143.144	24.1383
6	124.22	15.982	5	9	2014	1	55	7	146	23.8317	34.9535	0.2318	0.1384	5.24189	0.0792	0.0757	1024.29	145.132	23.8011
6	124.22	15.982	5	9	2014	1	55	7	148	23.705	34.959	0.1938	0.1357	5.20591	0.0754	0.0751	1024.34	147.119	23.6741
6	124.22	15.982	5	9	2014	1	55	7	150	23.6711	34.9593	0.1847	0.1342	5.17629	0.0744	0.0749	1024.36	149.107	23.6399
6	124.22	15.982	5	9	2014	1	55	7	152	23.5733	34.9656	0.1977	0.1353	5.163	0.0758	0.0751	1024.4	151.094	23.5417
6	124.22	15.982	5	9	2014	1	55	7	154	23.529	34.9712	0.1601	0.137	5.14745	0.072	0.0754	1024.42	153.081	23.4971
6	124.22	15.982	5	9	2014	1	55	7	156	23.4424	34.9746	0.1711	0.1348	5.12356	0.0731	0.075	1024.46	155.069	23.4101
6	124.22	15.982	5	9	2014	1	55	7	158	23.3884	34.9749	0.1591	0.1274	5.11618	0.0719	0.0735	1024.48	157.056	23.3557
6	124.22	15.982	5	9	2014	1	55	7	160	23.309	34.9756	0.1539	0.1326	5.12542	0.0714	0.0745	1024.52	159.043	23.276
6	124.22	15.982	5	9	2014	1	55	7	162	23.2006	34.9761	0.1318	0.13	5.12941	0.0692	0.074	1024.56	161.031	23.1673
6	124.22	15.982	5	9	2014	1	55	7	164	23.0704	34.9775	0.1492	0.1372	5.13198	0.071	0.0754	1024.61	163.017	23.0368
6	124.22	15.982	5	9	2014	1	55	7	166	23.0224	34.9751	0.1221	0.133	5.13951	0.0682	0.0746	1024.63	165.005	22.9884
6	124.22	15.982	5	9	2014	1	55	7	168	22.8745	34.9727	0.1363	0.1295	5.14898	0.0696	0.0739	1024.68	166.992	22.8404
6	124.22	15.982	5	9	2014	1	55	7	170	22.6773	34.9763	0.1128	0.1301	5.13907	0.0673	0.074	1024.74	168.979	22.643
6	124.22	15.982	5	9	2014	1	55	7	172	22.6082	34.9763	0.1165	0.1259	5.1354	0.0677	0.0732	1024.77	170.967	22.5735
6	124.22	15.982	5	9	2014	1	55	7	174	22.4364	34.974	0.1037	0.1323	5.14283	0.0664	0.0745	1024.83	172.953	22.4015
6	124.22	15.982	5	9	2014	1	55	7	176	22.3252	34.9741	0.0857	0.13	5.14914	0.0646	0.074	1024.87	174.941	22.29
6	124.22	15.982	5	9	2014	1	55	7	178	22.0155	34.9746	0.094	0.1255	5.18317	0.0654	0.0731	1024.97	176.928	21.9803
6	124.22	15.982	5	9	2014	1	55	7	180	21.6332	34.9714	0.074	0.1298	5.1814	0.0634	0.074	1025.08	178.915	21.598
6	124.22	15.982	5	9	2014	1	55	7	182	21.4326	34.9562	0.0546	0.1369	5.18968	0.0615	0.0754	1025.13	180.902	21.3973
6	124.22	15.982	5	9	2014	1	55	7	184	21.3317	34.9508	0.0388	0.1299	5.2037	0.0599	0.074	1025.17	182.889	21.2961
6	124.22	15.982	5	9	2014	1	55	7	186	21.2858	34.9479	0.0362	0.1242	5.20581	0.0596	0.0728	1025.18	184.877	21.2499
6	124.22	15.982	5	9	2014	1	55	7	188	21.257	34.9463	0.0517	0.1291	5.21132	0.0612	0.0739	1025.2	186.862	21.2207
6	124.22	15.982	5	9	2014	1	55	7	190	21.173	34.938	0.0443	0.1323	5.22437	0.0604	0.0745	1025.23	188.85	21.1364
6	124.22	15.982	5	9	2014	1	55	7	192	21.0336	34.9213	0.0361	0.121	5.26896	0.0596	0.0722	1025.26	190.836	20.9968
6	124.22	15.982	5	9	2014	1	55	7	194	20.7917	34.9031	0.0063	0.1281	5.30469	0.0566	0.0736	1025.32	192.824	20.7549
6	124.22	15.982	5	9	2014	1	55	7	196	20.6041	34.9115	0.0041	0.1305	5.31448	0.0564	0.0741	1025.39	194.811	20.5671
6	124.22	15.982	5	9	2014	1	55	7	198	20.4572	34.917		0.1303	5.31968	0.0557	0.074	1025.44	196.797	20.42
6	124.22	15.982	5	9	2014	1	55	7	200	20.2837	34.9086		0.1266	5.31346	0.0558	0.0733	1025.49	198.785	20.2463
6	124.22	15.982	5	9	2014	1	55	7	202	20.1868	34.9046		0.1234	5.31988	0.0541	0.0727	1025.52	200.772	20.1492
6	124.22	15.982	5	9	2014	1	55	7	204	20.0984	34.9002		0.1209	5.33202	0.052	0.0722	1025.55	202.758	20.0605
6	124.22	15.982	5	9	2014	1	55	7	206	20.0179	34.8962		0.1254	5.33654	0.0525	0.0731	1025.58	204.745	19.9798
6	124.22	15.982	5	9	2014	1	55	7	208	19.9278	34.8914		0.1215	5.35739	0.0535	0.0723	1025.6	206.732	19.8895
6	124.22	15.982	5	9	2014	1	55	7	210	19.8224	34.8852		0.1239	5.37186	0.0513	0.0728	1025.64	208.719	19.7838
6	124.22	15.982	5	9	2014	1	55	7	212	19.6588	34.8736		0.1239	5.3885	0.0512	0.0728	1025.68	210.705	19.6201
6	124.22	15.982	5	9	2014	1	55	7	214	19.5775	34.8682		0.1213	5.41287	0.0504	0.0722	1025.71	212.692	19.5386
6	124.22	15.982	5	9	2014	1	55	7	216	19.4782	34.8603		0.1218	5.44352	0.0512	0.0724	1025.73	214.679	19.439
6	124.22	15.982	5	9	2014	1	55	7	218	19.3159	34.8487		0.1234	5.4592	0.051	0.0727	1025.78	216.666	19.2765
6	124.22	15.982	5	9	2014	1	55	7	220	19.1942	34.8438		0.1192	5.46576	0.051	0.0718	1025.81	218.652	19.1547
6	124.22	15.982	5	9	2014	1	55	7	222	19.1826	34.8438		0.124	5.47527	0.0494	0.0728	1025.83	220.639	19.1428
6	124.22	15.982	5	9	2014	1	55	7	224	19.063	34.8336		0.1194	5.48937	0.0504	0.0719	1025.86	222.626	19.023
6	124.22	15.982	5	9	2014	1	55	7	226	18.9039	34.8223		0.123	5.50057	0.05	0.0726	1025.9	224.612	18.8638
6	124.22	15.982	5	9	2014	1	55	7	228	18.8562	34.8156		0.116	5.52258	0.0492	0.0712	1025.91	226.6	18.8157
6	124.22	15.982	5	9	2014	1	55	7	230	18.7634	34.8033		0.1232	5.55236	0.0492	0.0726	1025.94	228.586	18.7227
6	124.22	15.982	5	9	2014	1	55	7	232	18.7526	34.8028		0.1189	5.59463	0.0493	0.0718	1025.95	230.572	18.7116
6	124.22	15.982	5	9	2014	1	55	7	234	18.745	34.8048		0.1166	5.59176	0.0494	0.0713	1025.96	232.559	18.7037
6	124.22	15.982	5	9	2014	1	55	7	236	18.7258	34.8106		0.1172	5.59343	0.0488	0.0715	1025.98	234.546	18.6841
6	124.22	15.982	5	9	2014	1	55	7	238	18.677	34.8162		0.1209	5.5699	0.0483	0.0722	1026	236.532	18.635
6	124.22	15.982	5	9	2014	1	55	7	240	18.6436	34.8202		0.1255	5.54429	0.0485	0.0731	1026.02	238.519	18.6014
6	124.22	15.982	5	9	2014	1	55	7	242	18.5168	34.808		0.1256	5.5418	0.0491	0.0731	1026.06	240.505	18.4744
6	124.22	15.982	5	9	2014	1	55	7	244	18.4091	34.8		0.1284	5.56344	0.0489	0.0737	1026.09	242.491	18.3665
6	124.22	15.982	5	9	2014	1	55	7	246	18.3588	34.7956		0.1215	5.57441	0.0482	0.0723	1026.1	244.478	18.3159
6	124.22	15.982	5	9	2014	1	55	7	248	18.2176	34.7845		0.1212	5.58905	0.0498	0.0722	1026.14	246.464	18.1746
6	124.22	15.982	5	9	2014	1	55	7	250	18.0999	34.7761		0.1218	5.6174	0.0492	0.0724	1026.17	248.451	18.0568
6	124.22	15.982	5	9	2014	1	55	7	252	17.9971	34.7715		0.1218	5.61768	0.0486	0.0723	1026.2	250.437	17.9539
6	124.22	15.982	5	9	2014	1	55	7	254	17.9098	34.7707		0.1113	5.56251	0.0478	0.0702	1026.23	252.424	17.8664
6	124.22	15.982	5	9	2014	1	55	7	256	17.8425	34.7646		0.1241	5.54302	0.0488	0.0728	1026.25	254.41	17.7988
6	124.22	15.982	5	9	2014	1	55	7	258	17.602	34.7418		0.1209	5.57149	0.0479	0.0722	1026.3	256.396	17.5584
6	124.22	15.982	5	9	2014	1	55	7	260	17.4797	34.7315		0.1165	5.62997	0.049	0.0713	1026.34	258.383	17.4359
6	124.22	15.982	5	9	2014	1	55	7	262	17.4229	34.7256		0.1278	5.67369	0.0494	0.0736	1026.35	260.369	17.3789
6	124.22	15.982	5	9	2014	1	55	7	264	17.3735	34.7208		0.1161	5.71253	0.0482	0.0712	1026.37	262.355	17.3293
6	124.22	15.982	5	9	2014	1	55	7	266	17.2643	34.7117		0.1213	5.76023	0.0488	0.0723	1026.4	264.342	17.2199
6	124.22	15.982	5	9	2014	1	55	7	268	17.1804	34.7056		0.1265	5.79777	0.0494	0.0733	1026.42	266.327	17.1359
6	124.22	15.982	5	9	2014	1	55	7	270	17.1609	34.705		0.1289	5.82076	0.0483	0.0738	1026.44	268.314	17.1161
6	124.22	15.982	5	9	2014	1	55	7	272	17.1423	34.7041		0.1249	5.83258	0.049	0.073	1026.45	270.3	17.0971
6	124.22	15.982	5	9	2014	1	55	7	274	17.1288	34.7033		0.1234	5.84424	0.0475	0.0727	1026.46	272.286	17.0833
6	124.22	15.982	5	9	2014	1	55	7	276	17.0563	34.6972		0.1233	5.86312	0.0477	0.0727	1026.48	274.272	17.0106
6	124.22	15.982	5	9	2014	1	55	7	278	16.9586	34.6914		0.1253	5.86565	0.0497	0.0731	1026.51	276.258	16.9128
6	124.22	15.982	5	9	2014	1	55	7	280	16.9154	34.6889		0.1273	5.87094	0.049	0.0735	1026.53	278.245	16.8694
6	124.22	15.982	5	9	2014	1	55	7	282	16.8614	34.6847		0.1232	5.86872	0.0493	0.0726	1026.55	280.231	16.8152
6	124.22	15.982	5	9	2014	1	55	7	284	16.772	34.6786		0.1184	5.86108	0.0488	0.0716	1026.57	282.217	16.7256
6	124.22	15.982	5	9	2014	1	55	7	286	16.7294	34.6762		0.1197	5.86194	0.0482	0.0719	1026.59	284.203	16.6827
6	124.22	15.982	5	9	2014	1	55	7	288	16.6925	34.6742		0.116	5.85499	0.0488	0.0712	1026.6	286.189	16.6455
6	124.22	15.982	5	9	2014	1	55	7	290	16.6856	34.6739		0.1178	5.8442	0.0478	0.0716	1026.61	288.176	16.6384
6	124.22	15.982	5	9	2014	1	55	7	292	16.6775	34.6732		0.1297	5.84255	0.0491	0.074	1026.62	290.161	16.6299
6	124.22	15.982	5	9	2014	1	55	7	294	16.6426	34.671		0.1252	5.8458	0.0492	0.0731	1026.64	292.147	16.5947
6	124.22	15.982	5	9	2014	1	55	7	296	16.6239	34.6696		0.1193	5.836	0.0495	0.0719	1026.65	294.133	16.5758
6	124.22	15.982	5	9	2014	1	55	7	298	16.5835	34.6668		0.1248	5.82823	0.0505	0.073	1026.67	296.119	16.5351
6	124.22	15.982	5	9	2014	1	55	7	300	16.5606	34.665		0.1205	5.81926	0.0486	0.0721	1026.68	298.105	16.512
6	124.22	15.982	5	9	2014	1	55	7	302	16.4935	34.6595		0.1262	5.82077	0.0487	0.0733	1026.7	300.091	16.4447
6	124.22	15.982	5	9	2014	1	55	7	304	16.3804	34.651		0.1125	5.80334	0.0474	0.0705	1026.73	302.077	16.3315
6	124.22	15.982	5	9	2014	1	55	7	306	16.3142	34.6466		0.1202	5.77644	0.0489	0.0721	1026.75	304.063	16.2651
6	124.22	15.982	5	9	2014	1	55	7	308	16.2848	34.6448		0.1246	5.77578	0.0487	0.0729	1026.77	306.048	16.2355
6	124.22	15.982	5	9	2014	1	55	7	310	16.1448	34.6332		0.1117	5.76441	0.0484	0.0703	1026.8	308.035	16.0954
6	124.22	15.982	5	9	2014	1	55	7	312	16.0619	34.6279		0.1266	5.7221	0.0496	0.0733	1026.82	310.02	16.0124
6	124.22	15.982	5	9	2014	1	55	7	314	16.0379	34.6265		0.1243	5.70316	0.0486	0.0729	1026.84	312.006	15.9881
6	124.22	15.982	5	9	2014	1	55	7	316	16.0242	34.626		0.1248	5.67746	0.0492	0.0729	1026.85	313.991	15.9741
6	124.22	15.982	5	9	2014	1	55	7	318	16.0114	34.6251		0.1219	5.6611	0.0487	0.0724	1026.86	315.978	15.961
6	124.22	15.982	5	9	2014	1	55	7	320	15.9707	34.6216		0.1209	5.64095	0.0482	0.0722	1026.87	317.963	15.92
6	124.22	15.982	5	9	2014	1	55	7	322	15.9214	34.618		0.1232	5.62042	0.0481	0.0727	1026.89	319.949	15.8705
6	124.22	15.982	5	9	2014	1	55	7	324	15.8436	34.6116		0.1208	5.60316	0.0489	0.0722	1026.91	321.935	15.7926
6	124.22	15.982	5	9	2014	1	55	7	326	15.7809	34.6074		0.1242	5.59773	0.0485	0.0728	1026.93	323.921	15.7297
6	124.22	15.982	5	9	2014	1	55	7	328	15.7585	34.606		0.1271	5.5809	0.0479	0.0735	1026.95	325.906	15.7071
6	124.22	15.982	5	9	2014	1	55	7	330	15.735	34.6045		0.1259	5.56701	0.0497	0.0732	1026.96	327.892	15.6833
6	124.22	15.982	5	9	2014	1	55	7	332	15.7088	34.6025		0.1271	5.54925	0.0491	0.0734	1026.97	329.877	15.6568
6	124.22	15.982	5	9	2014	1	55	7	334	15.6578	34.5984		0.1222	5.53582	0.0493	0.0724	1026.99	331.863	15.6057
6	124.22	15.982	5	9	2014	1	55	7	336	15.5385	34.5893		0.1275	5.49602	0.0491	0.0735	1027.02	333.849	15.4864
6	124.22	15.982	5	9	2014	1	55	7	338	15.4624	34.5841		0.1208	5.47031	0.0484	0.0721	1027.04	335.833	15.4101
6	124.22	15.982	5	9	2014	1	55	7	340	15.359	34.5757		0.1201	5.47048	0.0481	0.072	1027.07	337.82	15.3066
6	124.22	15.982	5	9	2014	1	55	7	342	15.2171	34.5647		0.1304	5.46078	0.0481	0.0741	1027.1	339.805	15.1647
6	124.22	15.982	5	9	2014	1	55	7	344	15.1572	34.5606		0.1228	5.46794	0.0487	0.0725	1027.12	341.792	15.1047
6	124.22	15.982	5	9	2014	1	55	7	346	15.1378	34.5596		-0.6506	5.46678	0.0474	0.0719	1027.13	343.778	15.085
7	124.36	16.099	5	9	2014	5	8	20	4	29.7449	33.4527		0.1196	6.06748	0.0491	0.072	1020.67	3.978	29.7439
7	124.36	16.099	5	9	2014	5	8	20	6	29.7689	34.4083		0.1211	5.48837	0.0492	0.0722	1021.39	5.965	29.7674
7	124.36	16.099	5	9	2014	5	8	20	8	29.7092	34.4781		0.1147	5.47356	0.0488	0.0709	1021.47	7.955	29.7072
7	124.36	16.099	5	9	2014	5	8	20	10	29.4835	34.4978		0.1193	5.4913	0.0486	0.0719	1021.57	9.943	29.4811
7	124.36	16.099	5	9	2014	5	8	20	12	29.3983	34.4841		0.1085	5.49589	0.0495	0.0697	1021.59	11.933	29.3953
7	124.36	16.099	5	9	2014	5	8	20	14	29.3199	34.4632		0.1128	5.51063	0.0498	0.0705	1021.61	13.922	29.3165
7	124.36	16.099	5	9	2014	5	8	20	16	29.236	34.4554		0.107	5.49547	0.0491	0.0694	1021.64	15.91	29.2322
7	124.36	16.099	5	9	2014	5	8	20	18	29.1976	34.5065		0.1082	5.52256	0.05	0.0697	1021.7	17.898	29.1932
7	124.36	16.099	5	9	2014	5	8	20	20	29.2015	34.5264		0.1139	5.51794	0.0494	0.0708	1021.73	19.888	29.1967
7	124.36	16.099	5	9	2014	5	8	20	22	29.1565	34.5217		0.1194	5.53775	0.0487	0.0718	1021.75	21.875	29.1512
7	124.36	16.099	5	9	2014	5	8	20	24	29.0342	34.5097		0.1147	5.59246	0.0501	0.0709	1021.79	23.864	29.0284
7	124.36	16.099	5	9	2014	5	8	20	26	28.7937	34.5276		0.1095	5.61655	0.0487	0.0699	1021.89	25.853	28.7875
7	124.36	16.099	5	9	2014	5	8	20	28	28.7272	34.5528		0.1142	5.62167	0.0508	0.0708	1021.94	27.841	28.7205
7	124.36	16.099	5	9	2014	5	8	20	30	28.66	34.6		0.1117	5.63503	0.0506	0.0703	1022.01	29.831	28.6528
7	124.36	16.099	5	9	2014	5	8	20	32	28.4499	34.631		0.1176	5.70014	0.0522	0.0715	1022.11	31.818	28.4423
7	124.36	16.099	5	9	2014	5	8	20	34	28.1996	34.6989		0.1156	5.70753	0.0498	0.0711	1022.25	33.808	28.1916
7	124.36	16.099	5	9	2014	5	8	20	36	28.1422	34.7368		0.117	5.6997	0.0515	0.0714	1022.3	35.795	28.1337
7	124.36	16.099	5	9	2014	5	8	20	38	28.1183	34.7513		0.1162	5.71674	0.0511	0.0712	1022.33	37.784	28.1093
7	124.36	16.099	5	9	2014	5	8	20	40	28.006	34.7911		0.1109	5.71791	0.0503	0.0702	1022.41	39.772	27.9966
7	124.36	16.099	5	9	2014	5	8	20	42	27.9314	34.8065		0.1142	5.72167	0.052	0.0708	1022.45	41.761	27.9216
7	124.36	16.099	5	9	2014	5	8	20	44	27.9042	34.8121		0.1117	5.72358	0.0515	0.0703	1022.47	43.749	27.8938
7	124.36	16.099	5	9	2014	5	8	20	46	27.8806	34.8154		0.1077	5.71273	0.0518	0.0695	1022.49	45.738	27.8698
7	124.36	16.099	5	9	2014	5	8	20	48	27.8484	34.8188		0.1173	5.73314	0.0508	0.0714	1022.51	47.726	27.8371
7	124.36	16.099	5	9	2014	5	8	20	50	27.7774	34.8215		0.12	5.7337	0.0524	0.072	1022.55	49.714	27.7657
7	124.36	16.099	5	9	2014	5	8	20	52	27.7198	34.8211		0.1105	5.73491	0.0516	0.0701	1022.57	51.703	27.7077
7	124.36	16.099	5	9	2014	5	8	20	54	27.6754	34.8179		0.1181	5.71088	0.0529	0.0716	1022.59	53.691	27.6628
7	124.36	16.099	5	9	2014	5	8	20	56	27.6106	34.8174		0.1104	5.62775	0.0526	0.0701	1022.62	55.679	27.5975
7	124.36	16.099	5	9	2014	5	8	20	58	27.5664	34.8195		0.1157	5.72262	0.053	0.0711	1022.65	57.667	27.5529
7	124.36	16.099	5	9	2014	5	8	20	60	27.4526	34.8165		0.1186	5.76618	0.0519	0.0717	1022.69	59.656	27.4387
7	124.36	16.099	5	9	2014	5	8	20	62	27.3344	34.8043		0.1183	5.78668	0.0514	0.0717	1022.73	61.643	27.32
7	124.36	16.099	5	9	2014	5	8	20	64	27.2761	34.8059		0.1166	5.7934	0.052	0.0713	1022.76	63.633	27.2613
7	124.36	16.099	5	9	2014	5	8	20	66	27.252	34.8159		0.1161	5.79386	0.0526	0.0712	1022.78	65.62	27.2368
7	124.36	16.099	5	9	2014	5	8	20	68	27.1855	34.8185		0.1161	5.79104	0.0514	0.0712	1022.81	67.609	27.1698
7	124.36	16.099	5	9	2014	5	8	20	70	27.1186	34.8138		0.1142	5.78232	0.0537	0.0708	1022.84	69.596	27.1025
7	124.36	16.099	5	9	2014	5	8	20	72	27.0802	34.8091		0.1118	5.7695	0.0537	0.0704	1022.86	71.585	27.0637
7	124.36	16.099	5	9	2014	5	8	20	74	27.0537	34.8044		0.12	5.79707	0.0533	0.072	1022.87	73.573	27.0367
7	124.36	16.099	5	9	2014	5	8	20	76	27.0005	34.8058		0.112	5.79275	0.0537	0.0704	1022.9	75.561	26.9831
7	124.36	16.099	5	9	2014	5	8	20	78	26.9789	34.8075		0.1126	5.78452	0.0528	0.0705	1022.91	77.548	26.961
7	124.36	16.099	5	9	2014	5	8	20	80	27.0002	34.8198		0.1154	5.76785	0.0529	0.0711	1022.93	79.538	26.9818
7	124.36	16.099	5	9	2014	5	8	20	82	27.0023	34.8297		0.1131	5.75029	0.0533	0.0706	1022.94	81.524	26.9835
7	124.36	16.099	5	9	2014	5	8	20	84	26.9389	34.8141		0.1121	5.76151	0.0545	0.0704	1022.96	83.513	26.9197
7	124.36	16.099	5	9	2014	5	8	20	86	26.8997	34.8082		0.1122	5.76033	0.0544	0.0704	1022.97	85.501	26.88
7	124.36	16.099	5	9	2014	5	8	20	88	26.8638	34.8077		0.1106	5.76155	0.0545	0.0701	1022.99	87.489	26.8437
7	124.36	16.099	5	9	2014	5	8	20	90	26.8556	34.8145		0.1133	5.7527	0.0526	0.0707	1023.01	89.478	26.835
7	124.36	16.099	5	9	2014	5	8	20	92	26.8352	34.8169		0.1229	5.74344	0.0552	0.0726	1023.03	91.464	26.8142
7	124.36	16.099	5	9	2014	5	8	20	94	26.8089	34.817		0.1129	5.73734	0.0548	0.0706	1023.04	93.454	26.7875
7	124.36	16.099	5	9	2014	5	8	20	96	26.7985	34.8241		0.1243	5.7314	0.0552	0.0729	1023.06	95.44	26.7766
7	124.36	16.099	5	9	2014	5	8	20	98	26.7905	34.8281	0.0108	0.1159	5.74165	0.0571	0.0712	1023.08	97.429	26.7681
7	124.36	16.099	5	9	2014	5	8	20	100	26.7728	34.8305		0.1156	5.73034	0.0553	0.0711	1023.09	99.416	26.75
7	124.36	16.099	5	9	2014	5	8	20	102	26.754	34.8313	0.0045	0.1168	5.72822	0.0565	0.0713	1023.11	101.404	26.7307
7	124.36	16.099	5	9	2014	5	8	20	104	26.7353	34.832	0.012	0.1194	5.73153	0.0572	0.0719	1023.12	103.392	26.7116
7	124.36	16.099	5	9	2014	5	8	20	106	26.6801	34.8368	0.0061	0.1179	5.71065	0.0566	0.0716	1023.15	105.38	26.656
7	124.36	16.099	5	9	2014	5	8	20	108	26.648	34.8461	0.0171	0.1162	5.70059	0.0577	0.0712	1023.18	107.368	26.6235
7	124.36	16.099	5	9	2014	5	8	20	110	26.6143	34.8519	0.0126	0.1115	5.71094	0.0573	0.0703	1023.2	109.355	26.5894
7	124.36	16.099	5	9	2014	5	8	20	112	26.5788	34.8527	0.0223	0.1163	5.70419	0.0582	0.0712	1023.22	111.344	26.5534
7	124.36	16.099	5	9	2014	5	8	20	114	26.5625	34.8547	0.0353	0.119	5.71206	0.0595	0.0718	1023.24	113.33	26.5367
7	124.36	16.099	5	9	2014	5	8	20	116	26.5218	34.8585	0.0341	0.122	5.73337	0.0594	0.0724	1023.26	115.318	26.4956
7	124.36	16.099	5	9	2014	5	8	20	118	26.4688	34.8597	0.0362	0.1163	5.72292	0.0596	0.0712	1023.29	117.306	26.4421
7	124.36	16.099	5	9	2014	5	8	20	120	26.4121	34.861	0.0366	0.1159	5.69775	0.0597	0.0712	1023.31	119.294	26.385
7	124.36	16.099	5	9	2014	5	8	20	122	26.3327	34.8588	0.0483	0.1171	5.69464	0.0609	0.0714	1023.35	121.282	26.3052
7	124.36	16.099	5	9	2014	5	8	20	124	26.158	34.8566	0.0705	0.1132	5.64232	0.0631	0.0706	1023.41	123.268	26.1302
7	124.36	16.099	5	9	2014	5	8	20	126	26.121	34.8588	0.0697	0.1128	5.61968	0.063	0.0705	1023.43	125.258	26.0928
7	124.36	16.099	5	9	2014	5	8	20	128	26.0877	34.8594	0.0794	0.1196	5.6016	0.0639	0.0719	1023.45	127.244	26.0591
7	124.36	16.099	5	9	2014	5	8	20	130	26.022	34.8626	0.0786	0.1144	5.60822	0.0639	0.0709	1023.48	129.232	25.9929
7	124.36	16.099	5	9	2014	5	8	20	132	25.9627	34.8651	0.0771	0.1253	5.59584	0.0637	0.073	1023.51	131.219	25.9333
7	124.36	16.099	5	9	2014	5	8	20	134	25.9105	34.8674	0.1024	0.1156	5.59554	0.0662	0.0711	1023.54	133.208	25.8807
7	124.36	16.099	5	9	2014	5	8	20	136	25.8203	34.8712	0.114	0.1133	5.60245	0.0674	0.0706	1023.58	135.195	25.7901
7	124.36	16.099	5	9	2014	5	8	20	138	25.6076	34.8834	0.1456	0.12	5.5499	0.0705	0.072	1023.66	137.182	25.5772
7	124.36	16.099	5	9	2014	5	8	20	140	25.449	34.8922	0.197	0.1224	5.49596	0.0757	0.0725	1023.73	139.169	25.4182
7	124.36	16.099	5	9	2014	5	8	20	142	25.2137	34.9003	0.2288	0.118	5.45414	0.0789	0.0716	1023.81	141.157	25.1827
7	124.36	16.099	5	9	2014	5	8	20	144	25.0043	34.906	0.3141	0.1086	5.41381	0.0874	0.0697	1023.89	143.144	24.9731
7	124.36	16.099	5	9	2014	5	8	20	146	24.8036	34.914	0.3221	0.1116	5.35334	0.0882	0.0703	1023.96	145.132	24.7722
7	124.36	16.099	5	9	2014	5	8	20	148	24.6057	34.9206	0.3212	0.1132	5.31316	0.0881	0.0706	1024.04	147.119	24.574
7	124.36	16.099	5	9	2014	5	8	20	150	24.5275	34.9249	0.3074	0.118	5.27436	0.0867	0.0716	1024.07	149.107	24.4954
7	124.36	16.099	5	9	2014	5	8	20	152	24.3841	34.9425	0.284	0.1182	5.27697	0.0844	0.0716	1024.14	151.094	24.3517
7	124.36	16.099	5	9	2014	5	8	20	154	24.1826	34.9665	0.2294	0.1121	5.20755	0.0789	0.0704	1024.23	153.081	24.15
7	124.36	16.099	5	9	2014	5	8	20	156	24.0323	34.9786	0.2273	0.1251	5.14431	0.0787	0.073	1024.29	155.069	23.9994
7	124.36	16.099	5	9	2014	5	8	20	158	23.9485	34.9838	0.2201	0.1175	5.12914	0.0779	0.0715	1024.33	157.055	23.9152
7	124.36	16.099	5	9	2014	5	8	20	160	23.8188	34.9824	0.2081	0.1201	5.13403	0.0768	0.072	1024.37	159.044	23.7853
7	124.36	16.099	5	9	2014	5	8	20	162	23.6689	34.9769	0.1962	0.1178	5.14227	0.0756	0.0715	1024.42	161.03	23.6352
7	124.36	16.099	5	9	2014	5	8	20	164	23.4931	34.9772	0.1959	0.1206	5.15231	0.0756	0.0721	1024.48	163.017	23.4591
7	124.36	16.099	5	9	2014	5	8	20	166	23.3516	34.9754	0.1773	0.1172	5.14137	0.0738	0.0714	1024.53	165.005	23.3173
7	124.36	16.099	5	9	2014	5	8	20	168	23.2136	34.9716	0.1703	0.1182	5.14031	0.0731	0.0716	1024.58	166.992	23.1791
7	124.36	16.099	5	9	2014	5	8	20	170	23.0914	34.9727	0.1594	0.1184	5.14666	0.0719	0.0717	1024.62	168.979	23.0566
7	124.36	16.099	5	9	2014	5	8	20	172	22.9661	34.974	0.1592	0.1159	5.14464	0.0719	0.0712	1024.67	170.966	22.931
7	124.36	16.099	5	9	2014	5	8	20	174	22.7568	34.9716	0.1429	0.1161	5.16657	0.0703	0.0712	1024.73	172.954	22.7215
7	124.36	16.099	5	9	2014	5	8	20	176	22.4795	34.9651	0.1319	0.1118	5.1721	0.0692	0.0703	1024.82	174.94	22.4442
7	124.36	16.099	5	9	2014	5	8	20	178	22.3148	34.9642	0.1129	0.1172	5.16813	0.0673	0.0714	1024.87	176.928	22.2793
7	124.36	16.099	5	9	2014	5	8	20	180	22.1065	34.9688	0.1068	0.1213	5.15882	0.0667	0.0722	1024.94	178.915	22.0708
7	124.36	16.099	5	9	2014	5	8	20	182	21.985	34.9727	0.0873	0.1124	5.13791	0.0647	0.0705	1024.99	180.902	21.949
7	124.36	16.099	5	9	2014	5	8	20	184	21.8197	34.9756	0.0859	0.1133	5.13024	0.0646	0.0706	1025.05	182.889	21.7835
7	124.36	16.099	5	9	2014	5	8	20	186	21.5951	34.9813	0.0616	0.1191	5.09844	0.0622	0.0718	1025.12	184.876	21.5587
7	124.36	16.099	5	9	2014	5	8	20	188	21.5226	34.9827	0.049	0.1099	5.07035	0.0609	0.07	1025.15	186.864	21.486
7	124.36	16.099	5	9	2014	5	8	20	190	21.4578	34.981	0.0471	0.1187	5.07046	0.0607	0.0717	1025.18	188.849	21.4209
7	124.36	16.099	5	9	2014	5	8	20	192	21.3157	34.9775	0.0252	0.1142	5.06374	0.0585	0.0708	1025.22	190.838	21.2786
7	124.36	16.099	5	9	2014	5	8	20	194	21.26	34.9769	0.0319	0.1158	5.05881	0.0592	0.0711	1025.25	192.824	21.2226
7	124.36	16.099	5	9	2014	5	8	20	196	21.1681	34.9758	0.0225	0.1077	5.06101	0.0582	0.0695	1025.28	194.81	21.1304
7	124.36	16.099	5	9	2014	5	8	20	198	20.9761	34.9713		0.1096	5.06457	0.0557	0.0699	1025.34	196.798	20.9383
7	124.36	16.099	5	9	2014	5	8	20	200	20.855	34.9637	0.0013	0.1096	5.0605	0.0561	0.0699	1025.38	198.785	20.8169
7	124.36	16.099	5	9	2014	5	8	20	202	20.827	34.9612		0.124	5.07004	0.0548	0.0728	1025.39	200.771	20.7886
7	124.36	16.099	5	9	2014	5	8	20	204	20.7085	34.9536		0.1084	5.09383	0.0551	0.0697	1025.43	202.759	20.6698
7	124.36	16.099	5	9	2014	5	8	20	206	20.4865	34.9328		0.1117	5.166	0.0556	0.0703	1025.48	204.745	20.4478
7	124.36	16.099	5	9	2014	5	8	20	208	20.2449	34.9167		0.1138	5.21026	0.0543	0.0707	1025.54	206.732	20.2061
7	124.36	16.099	5	9	2014	5	8	20	210	20.1311	34.9052		0.1126	5.26421	0.0532	0.0705	1025.57	208.719	20.0921
7	124.36	16.099	5	9	2014	5	8	20	212	19.9236	34.8882		0.1082	5.32778	0.0507	0.0696	1025.62	210.705	19.8845
7	124.36	16.099	5	9	2014	5	8	20	214	19.8324	34.8807		0.1075	5.34383	0.0521	0.0695	1025.65	212.692	19.7931
7	124.36	16.099	5	9	2014	5	8	20	216	19.799	34.8776		0.112	5.37209	0.0505	0.0704	1025.66	214.68	19.7594
7	124.36	16.099	5	9	2014	5	8	20	218	19.7675	34.8732		0.1086	5.39723	0.051	0.0697	1025.68	216.665	19.7276
7	124.36	16.099	5	9	2014	5	8	20	220	19.6059	34.8547		0.1095	5.4374	0.0501	0.07	1025.71	218.653	19.5658
7	124.36	16.099	5	9	2014	5	8	20	222	19.556	34.8528		0.1081	5.4729	0.0501	0.0696	1025.73	220.639	19.5156
7	124.36	16.099	5	9	2014	5	8	20	224	19.4588	34.8512		0.1062	5.48024	0.0504	0.0693	1025.77	222.626	19.4181
7	124.36	16.099	5	9	2014	5	8	20	226	19.3382	34.8506		0.111	5.47215	0.0505	0.0702	1025.81	224.612	19.2974
7	124.36	16.099	5	9	2014	5	8	20	228	19.2348	34.8449		0.1055	5.47992	0.0488	0.0691	1025.84	226.599	19.1938
7	124.36	16.099	5	9	2014	5	8	20	230	19.053	34.8425		0.1108	5.47633	0.0494	0.0701	1025.89	228.586	19.0119
7	124.36	16.099	5	9	2014	5	8	20	232	18.9086	34.8379		0.1089	5.40912	0.049	0.0698	1025.93	230.572	18.8674
7	124.36	16.099	5	9	2014	5	8	20	234	18.8452	34.8331		0.1119	5.39864		0.0704	1025.96	232.559	18.8037
7	124.36	16.099	5	9	2014	5	8	20	236	18.8162	34.8315		0.11	5.40515	0.0479	0.07	1025.97	234.545	18.7744
7	124.36	16.099	5	9	2014	5	8	20	238	18.7562	34.8274		0.1058	5.41564	0.0494	0.0692	1025.99	236.532	18.7141
7	124.36	16.099	5	9	2014	5	8	20	240	18.6747	34.8234		0.1055	5.43637	0.0482	0.0691	1026.02	238.518	18.6324
7	124.36	16.099	5	9	2014	5	8	20	242	18.5506	34.8191		0.103	5.42972	0.0492	0.0686	1026.06	240.506	18.5082
7	124.36	16.099	5	9	2014	5	8	20	244	18.4426	34.809		0.1043	5.41866	0.0493	0.0689	1026.08	242.491	18.4
7	124.36	16.099	5	9	2014	5	8	20	246	18.3437	34.7981		0.1061	5.44884	0.0486	0.0692	1026.11	244.478	18.3009
7	124.36	16.099	5	9	2014	5	8	20	248	18.1749	34.7853		0.1027	5.50726	0.0486	0.0686	1026.15	246.465	18.132
7	124.36	16.099	5	9	2014	5	8	20	250	18.0447	34.7724		0.1017	5.54986	0.05	0.0683	1026.18	248.451	18.0017
7	124.36	16.099	5	9	2014	5	8	20	252	17.9517	34.7657		0.1096	5.58587	0.0488	0.0699	1026.21	250.436	17.9085
7	124.36	16.099	5	9	2014	5	8	20	254	17.8219	34.7566		0.1111	5.59229	0.049	0.0702	1026.24	252.424	17.7786
7	124.36	16.099	5	9	2014	5	8	20	256	17.7827	34.7546		0.1079	5.60901	0.0489	0.0696	1026.26	254.41	17.7391
7	124.36	16.099	5	9	2014	5	8	20	258	17.7188	34.7514		0.1086	5.60975	0.0485	0.0697	1026.28	256.397	17.675
7	124.36	16.099	5	9	2014	5	8	20	260	17.6514	34.7445		0.1132	5.60848	0.049	0.0706	1026.3	258.382	17.6073
7	124.36	16.099	5	9	2014	5	8	20	262	17.559	34.7364		0.1037	5.6779	0.0484	0.0688	1026.33	260.369	17.5148
7	124.36	16.099	5	9	2014	5	8	20	264	17.4507	34.7264		0.0988	5.71522	0.0494	0.0678	1026.36	262.355	17.4063
7	124.36	16.099	5	9	2014	5	8	20	266	17.4069	34.7232		0.1081	5.74219	0.0489	0.0696	1026.37	264.342	17.3623
7	124.36	16.099	5	9	2014	5	8	20	268	17.3521	34.7196		0.1087	5.75301	0.0487	0.0697	1026.39	266.327	17.3072
7	124.36	16.099	5	9	2014	5	8	20	270	17.2811	34.7146		0.1058	5.7677	0.0501	0.0692	1026.41	268.314	17.236
7	124.36	16.099	5	9	2014	5	8	20	272	17.2358	34.7122		0.1077	5.77582	0.0496	0.0695	1026.43	270.3	17.1905
7	124.36	16.099	5	9	2014	5	8	20	274	17.1949	34.7091		0.1076	5.77393	0.0484	0.0695	1026.45	272.286	17.1493
7	124.36	16.099	5	9	2014	5	8	20	276	17.1559	34.7057		0.1061	5.78628	0.05	0.0692	1026.46	274.273	17.1101
7	124.36	16.099	5	9	2014	5	8	20	278	17.0942	34.7011		0.1053	5.79643	0.0482	0.0691	1026.48	276.259	17.0482
7	124.36	16.099	5	9	2014	5	8	20	280	17.0586	34.6981		0.1079	5.78433	0.0496	0.0696	1026.5	278.244	17.0123
7	124.36	16.099	5	9	2014	5	8	20	282	16.9824	34.6925		0.1044	5.77602	0.0493	0.0689	1026.52	280.231	16.9359
7	124.36	16.099	5	9	2014	5	8	20	284	16.9131	34.6889		0.1057	5.75635	0.0482	0.0692	1026.55	282.217	16.8664
7	124.36	16.099	5	9	2014	5	8	20	286	16.8633	34.6844		0.1064	5.74057	0.0483	0.0693	1026.56	284.203	16.8163
7	124.36	16.099	5	9	2014	5	8	20	288	16.8111	34.6823		0.106	5.73928	0.0485	0.0692	1026.58	286.19	16.7639
7	124.36	16.099	5	9	2014	5	8	20	290	16.7626	34.6783		0.1049	5.72761	0.0492	0.069	1026.6	288.175	16.7152
7	124.36	16.099	5	9	2014	5	8	20	292	16.7494	34.6776		0.1081	5.7113	0.0505	0.0696	1026.61	290.161	16.7017
7	124.36	16.099	5	9	2014	5	8	20	294	16.7449	34.6776		0.1108	5.71346	0.0482	0.0701	1026.62	292.147	16.6968
7	124.36	16.099	5	9	2014	5	8	20	296	16.6946	34.6744		0.1077	5.71702	0.0492	0.0695	1026.64	294.134	16.6464
7	124.36	16.099	5	9	2014	5	8	20	298	16.623	34.6692		0.1047	5.70677	0.0496	0.0689	1026.66	296.119	16.5745
7	124.36	16.099	5	9	2014	5	8	20	300	16.6076	34.6682		0.1131	5.69092	0.049	0.0706	1026.67	298.105	16.5588
7	124.36	16.099	5	9	2014	5	8	20	302	16.5898	34.6671		0.1089	5.68703	0.0482	0.0698	1026.68	300.091	16.5408
7	124.36	16.099	5	9	2014	5	8	20	304	16.5633	34.6648		0.1129	5.67078	0.0489	0.0706	1026.7	302.077	16.514
7	124.36	16.099	5	9	2014	5	8	20	306	16.5341	34.6626		0.106	5.64502	0.0482	0.0692	1026.71	304.062	16.4845
7	124.36	16.099	5	9	2014	5	8	20	308	16.4788	34.6585		0.1074	5.61744	0.049	0.0695	1026.73	306.048	16.4291
7	124.36	16.099	5	9	2014	5	8	20	310	16.4454	34.6568		0.1112	5.61987	0.0478	0.0702	1026.75	308.035	16.3954
7	124.36	16.099	5	9	2014	5	8	20	312	16.3302	34.6472		0.1052	5.62616	0.0481	0.0691	1026.77	310.02	16.2801
7	124.36	16.099	5	9	2014	5	8	20	314	16.1163	34.6341		0.1079	5.62068	0.0486	0.0696	1026.82	312.005	16.0663
7	124.36	16.099	5	9	2014	5	8	20	316	16.0329	34.6259		0.1078	5.57854	0.0493	0.0696	1026.85	313.992	15.9828
7	124.36	16.099	5	9	2014	5	8	20	318	15.9861	34.6225		0.1049	5.5414	0.049	0.069	1026.86	315.978	15.9357
7	124.36	16.099	5	9	2014	5	8	20	320	15.9447	34.6198		0.1069	5.52194	0.049	0.0694	1026.88	317.963	15.8941
7	124.36	16.099	5	9	2014	5	8	20	322	15.8765	34.6147		0.1064	5.50164	0.0484	0.0693	1026.9	319.948	15.8258
7	124.36	16.099	5	9	2014	5	8	20	324	15.8031	34.6098		0.1061	5.49121	0.0484	0.0692	1026.92	321.935	15.7523
7	124.36	16.099	5	9	2014	5	8	20	326	15.716	34.6028		0.1062	5.47623	0.0484	0.0693	1026.95	323.92	15.665
7	124.36	16.099	5	9	2014	5	8	20	328	15.6494	34.5983		0.1117	5.4638	0.0495	0.0703	1026.97	325.906	15.5983
7	124.36	16.099	5	9	2014	5	8	20	330	15.5672	34.5922		0.1062	5.45035	0.0494	0.0692	1026.99	327.892	15.5159
7	124.36	16.099	5	9	2014	5	8	20	332	15.5143	34.5902		0.1045	5.43919	0.049	0.0689	1027.01	329.877	15.4629
7	124.36	16.099	5	9	2014	5	8	20	334	15.4717	34.5854		0.1033	5.4176	0.049	0.0687	1027.02	331.863	15.42
7	124.36	16.099	5	9	2014	5	8	20	336	15.3608	34.5792		0.1091	5.41133	0.049	0.0698	1027.05	333.849	15.309
7	124.36	16.099	5	9	2014	5	8	20	338	15.3004	34.5733		0.1042	5.3722		0.0689	1027.07	335.834	15.2485
7	124.36	16.099	5	9	2014	5	8	20	340	15.2689	34.5713		0.1158	5.36531		0.0711	1027.09	337.822	15.2168
7	124.36	16.099	5	9	2014	5	8	20	342	15.1393	34.5615	0.0492	0.1085	5.34852	0.0496	0.0697	1027.12	339.803	15.0871
7	124.36	16.099	5	9	2014	5	8	20	344	14.965	34.5506		0.1085	5.35228	0.0484	0.0697	1027.16	341.791	14.913
7	124.36	16.099	5	9	2014	5	8	20	346	14.8287	34.5396		0.1057	5.36639	0.0486	0.0692	1027.19	343.776	14.7767
7	124.36	16.099	5	9	2014	5	8	20	348	14.7245	34.5312		0.1068	5.36551	0.0486	0.0694	1027.21	345.762	14.6724
7	124.36	16.099	5	9	2014	5	8	20	350	14.5621	34.5228		0.0984		0.0489	0.0677	1027.25	347.752	14.5102
8	124.51	16.223	5	9	2014	8	0	5	4	29.7412	34.2457		0.139	3.30337	0.0483	0.0758	1021.27	3.978	29.7402
8	124.51	16.223	5	9	2014	8	0	5	6	29.7555	34.2603		0.1243	5.24451	0.0494	0.0729	1021.28	5.966	29.754
8	124.51	16.223	5	9	2014	8	0	5	8	29.7535	34.2619		0.1219	5.46557	0.0493	0.0724	1021.29	7.954	29.7515
8	124.51	16.223	5	9	2014	8	0	5	10	29.7042	34.2603		0.1217	5.49819	0.0493	0.0723	1021.31	9.944	29.7018
8	124.51	16.223	5	9	2014	8	0	5	12	29.5479	34.2538		0.127	5.49851	0.0494	0.0734	1021.37	11.932	29.5449
8	124.51	16.223	5	9	2014	8	0	5	14	29.352	34.2466		0.1283	5.50792	0.0495	0.0737	1021.44	13.921	29.3486
8	124.51	16.223	5	9	2014	8	0	5	16	29.3247	34.2508		0.1233	5.49792	0.0495	0.0726	1021.46	15.91	29.3208
8	124.51	16.223	5	9	2014	8	0	5	18	29.2691	34.2746		0.1188	5.49823	0.0484	0.0717	1021.51	17.898	29.2647
8	124.51	16.223	5	9	2014	8	0	5	20	29.2226	34.2903		0.129	5.50136	0.0497	0.0738	1021.54	19.887	29.2178
8	124.51	16.223	5	9	2014	8	0	5	22	29.2067	34.2964		0.1274	5.52693	0.0492	0.0735	1021.56	21.876	29.2013
8	124.51	16.223	5	9	2014	8	0	5	24	29.1959	34.299		0.1243	5.52995	0.0509	0.0729	1021.58	23.865	29.1901
8	124.51	16.223	5	9	2014	8	0	5	26	29.1789	34.3051		0.129	5.54567	0.0498	0.0738	1021.59	25.853	29.1726
8	124.51	16.223	5	9	2014	8	0	5	28	28.9836	34.365		0.1255	5.5784	0.0503	0.0731	1021.71	27.841	28.9768
8	124.51	16.223	5	9	2014	8	0	5	30	28.6851	34.4285		0.1288	5.64517	0.0509	0.0738	1021.87	29.83	28.6779
8	124.51	16.223	5	9	2014	8	0	5	32	28.3833	34.5767		0.13	5.69227	0.0501	0.074	1022.09	31.818	28.3757
8	124.51	16.223	5	9	2014	8	0	5	34	28.2467	34.6895		0.1283	5.70535	0.0503	0.0737	1022.23	33.807	28.2386
8	124.51	16.223	5	9	2014	8	0	5	36	28.1108	34.731		0.1338	5.71456	0.0505	0.0748	1022.31	35.796	28.1024
8	124.51	16.223	5	9	2014	8	0	5	38	28.0741	34.7494		0.1323	5.7102	0.0521	0.0745	1022.34	37.783	28.0651
8	124.51	16.223	5	9	2014	8	0	5	40	27.9811	34.7765		0.1324	5.71901	0.0506	0.0745	1022.4	39.773	27.9717
8	124.51	16.223	5	9	2014	8	0	5	42	27.8135	34.8124		0.1277	5.70967	0.0502	0.0736	1022.49	41.761	27.8037
8	124.51	16.223	5	9	2014	8	0	5	44	27.7385	34.8182		0.1305	5.74046	0.0505	0.0741	1022.53	43.749	27.7282
8	124.51	16.223	5	9	2014	8	0	5	46	27.6813	34.8129		0.1259	5.75127	0.0516	0.0732	1022.55	45.737	27.6706
8	124.51	16.223	5	9	2014	8	0	5	48	27.6291	34.8112		0.1275	5.75687	0.051	0.0735	1022.58	47.726	27.618
8	124.51	16.223	5	9	2014	8	0	5	50	27.6235	34.8248		0.128	5.75297	0.0525	0.0736	1022.6	49.714	27.6119
8	124.51	16.223	5	9	2014	8	0	5	52	27.5665	34.8236		0.1305	5.75488	0.0517	0.0741	1022.63	51.702	27.5544
8	124.51	16.223	5	9	2014	8	0	5	54	27.5541	34.8303		0.1323	5.74728	0.0525	0.0745	1022.64	53.691	27.5416
8	124.51	16.223	5	9	2014	8	0	5	56	27.5258	34.8311		0.13	5.74062	0.0523	0.074	1022.66	55.679	27.5127
8	124.51	16.223	5	9	2014	8	0	5	58	27.4749	34.8349		0.1271	5.75263	0.0533	0.0734	1022.69	57.667	27.4615
8	124.51	16.223	5	9	2014	8	0	5	60	27.4405	34.8387		0.1361	5.75536	0.0547	0.0752	1022.71	59.656	27.4266
8	124.51	16.223	5	9	2014	8	0	5	62	27.4223	34.843		0.131	5.74714	0.055	0.0742	1022.73	61.644	27.4079
8	124.51	16.223	5	9	2014	8	0	5	64	27.3083	34.8171		0.1325	5.77341	0.0537	0.0745	1022.76	63.632	27.2935
8	124.51	16.223	5	9	2014	8	0	5	66	27.2474	34.8081			5.78661	0.0547		1022.78	65.62	27.2322
8	124.51	16.223	5	9	2014	8	0	5	68	27.204	34.8029		0.1322	5.79667	0.0539	0.0745	1022.8	67.608	27.1883
8	124.51	16.223	5	9	2014	8	0	5	70	27.1562	34.8149		0.1288	5.77946	0.0544	0.0738	1022.83	69.596	27.1401
8	124.51	16.223	5	9	2014	8	0	5	72	27.1191	34.8161		0.1287	5.76228	0.0542	0.0738	1022.85	71.585	27.1026
8	124.51	16.223	5	9	2014	8	0	5	74	27.0866	34.8128		0.1419	5.76828	0.0554	0.0764	1022.87	73.573	27.0696
8	124.51	16.223	5	9	2014	8	0	5	76	27.0436	34.8134		0.1328	5.76459	0.0552	0.0746	1022.89	75.561	27.0261
8	124.51	16.223	5	9	2014	8	0	5	78	26.9838	34.8057	0.0016	0.1332	5.77045	0.0562	0.0747	1022.91	77.549	26.9659
8	124.51	16.223	5	9	2014	8	0	5	80	26.9609	34.8044	0.0006	0.1356	5.77008	0.0561	0.0751	1022.93	79.537	26.9426
8	124.51	16.223	5	9	2014	8	0	5	82	26.9199	34.8022		0.1361	5.76526	0.0551	0.0752	1022.95	81.525	26.9011
8	124.51	16.223	5	9	2014	8	0	5	84	26.8967	34.8076		0.1301	5.77653	0.0553	0.074	1022.97	83.512	26.8775
8	124.51	16.223	5	9	2014	8	0	5	86	26.8538	34.8135		0.1269	5.75518	0.0559	0.0734	1022.99	85.502	26.8342
8	124.51	16.223	5	9	2014	8	0	5	88	26.8118	34.8276		0.1313	5.74704	0.0552	0.0743	1023.03	87.489	26.7918
8	124.51	16.223	5	9	2014	8	0	5	90	26.7504	34.8398	0.0039	0.1299	5.713	0.0564	0.074	1023.06	89.477	26.7299
8	124.51	16.223	5	9	2014	8	0	5	92	26.7095	34.8443	0.0145	0.1292	5.69707	0.0575	0.0738	1023.09	91.465	26.6885
8	124.51	16.223	5	9	2014	8	0	5	94	26.6621	34.8524	0.0096	0.1257	5.69888	0.057	0.0731	1023.12	93.453	26.6408
8	124.51	16.223	5	9	2014	8	0	5	96	26.6523	34.8547	0.0232	0.1296	5.7055	0.0583	0.0739	1023.13	95.441	26.6305
8	124.51	16.223	5	9	2014	8	0	5	98	26.5996	34.8551	0.0303	0.1304	5.72139	0.059	0.0741	1023.16	97.429	26.5774
8	124.51	16.223	5	9	2014	8	0	5	100	26.5268	34.8506	0.0356	0.1319	5.69442	0.0596	0.0744	1023.18	99.416	26.5042
8	124.51	16.223	5	9	2014	8	0	5	102	26.4894	34.8489	0.043	0.1329	5.67833	0.0603	0.0746	1023.2	101.404	26.4663
8	124.51	16.223	5	9	2014	8	0	5	104	26.4523	34.848	0.0354	0.1298	5.68132	0.0595	0.074	1023.22	103.392	26.4288
8	124.51	16.223	5	9	2014	8	0	5	106	26.433	34.8479	0.0499	0.1308	5.66103	0.061	0.0742	1023.24	105.38	26.409
8	124.51	16.223	5	9	2014	8	0	5	108	26.4207	34.848	0.0601	0.1295	5.66835	0.062	0.0739	1023.25	107.368	26.3963
8	124.51	16.223	5	9	2014	8	0	5	110	26.3983	34.848	0.0602	0.1284	5.65157	0.0622	0.0737	1023.27	109.355	26.3734
8	124.51	16.223	5	9	2014	8	0	5	112	26.3863	34.8482	0.0658	0.1255	5.64144	0.0626	0.0731	1023.28	111.343	26.3611
8	124.51	16.223	5	9	2014	8	0	5	114	26.3635	34.8487	0.0689	0.1396	5.64224	0.0629	0.0759	1023.3	113.331	26.3378
8	124.51	16.223	5	9	2014	8	0	5	116	26.2611	34.8514	0.0842	0.1299	5.63451	0.0644	0.074	1023.34	115.319	26.235
8	124.51	16.223	5	9	2014	8	0	5	118	26.0638	34.8614	0.0892	0.134	5.62903	0.0649	0.0748	1023.42	117.306	26.0374
8	124.51	16.223	5	9	2014	8	0	5	120	25.9368	34.8631	0.1155	0.1324	5.64378	0.0675	0.0745	1023.47	119.294	25.9101
8	124.51	16.223	5	9	2014	8	0	5	122	25.7333	34.8571	0.1664	0.1292	5.63271	0.0726	0.0738	1023.53	121.282	25.7063
8	124.51	16.223	5	9	2014	8	0	5	124	25.5875	34.8504	0.1801	0.1343	5.65885	0.074	0.0749	1023.58	123.269	25.5601
8	124.51	16.223	5	9	2014	8	0	5	126	25.4396	34.8578	0.2074	0.1298	5.63837	0.0767	0.074	1023.64	125.257	25.4119
8	124.51	16.223	5	9	2014	8	0	5	128	25.367	34.8617	0.2335	0.1284	5.60183	0.0794	0.0737	1023.68	127.244	25.3389
8	124.51	16.223	5	9	2014	8	0	5	130	25.3225	34.8621	0.2251	0.1284	5.59763	0.0785	0.0737	1023.7	129.232	25.294
8	124.51	16.223	5	9	2014	8	0	5	132	25.2977	34.8622	0.2509	0.1281	5.60177	0.0811	0.0736	1023.71	131.219	25.2688
8	124.51	16.223	5	9	2014	8	0	5	134	25.2419	34.8613	0.2668	0.1328	5.60485	0.0827	0.0746	1023.74	133.206	25.2126
8	124.51	16.223	5	9	2014	8	0	5	136	25.1496	34.8662	0.2347	0.1329	5.59506	0.0795	0.0746	1023.78	135.195	25.12
8	124.51	16.223	5	9	2014	8	0	5	138	25.0112	34.8815	0.2478	0.1326	5.52536	0.0808	0.0745	1023.84	137.182	24.9813
8	124.51	16.223	5	9	2014	8	0	5	140	24.936	34.8855	0.2445	0.1247	5.49609	0.0804	0.073	1023.88	139.169	24.9057
8	124.51	16.223	5	9	2014	8	0	5	142	24.8773	34.8855	0.223	0.129	5.49556	0.0783	0.0738	1023.9	141.157	24.8466
8	124.51	16.223	5	9	2014	8	0	5	144	24.5585	34.9083	0.2415	0.1348	5.4057	0.0801	0.075	1024.03	143.144	24.5277
8	124.51	16.223	5	9	2014	8	0	5	146	24.4387	34.9278	0.2115	0.1294	5.30158	0.0771	0.0739	1024.09	145.132	24.4076
8	124.51	16.223	5	9	2014	8	0	5	148	24.4182	34.9329	0.2006	0.1287	5.28693	0.0761	0.0737	1024.1	147.12	24.3867
8	124.51	16.223	5	9	2014	8	0	5	150	24.3848	34.9384	0.2174	0.1299	5.26495	0.0778	0.074	1024.13	149.106	24.3529
8	124.51	16.223	5	9	2014	8	0	5	152	24.287	34.95	0.1968	0.1198	5.22643	0.0756	0.0719	1024.17	151.095	24.2547
8	124.51	16.223	5	9	2014	8	0	5	154	24.0838	34.9636	0.1897	0.131	5.20115	0.075	0.0742	1024.25	153.081	24.0513
8	124.51	16.223	5	9	2014	8	0	5	156	23.7073	34.9777	0.1588	0.1265	5.10025	0.0719	0.0733	1024.38	155.069	23.6748
8	124.51	16.223	5	9	2014	8	0	5	158	23.6225	34.9798	0.1511	0.1357	5.05901	0.0711	0.0751	1024.42	157.056	23.5896
8	124.51	16.223	5	9	2014	8	0	5	160	23.5687	34.9803	0.1408	0.1245	5.05453	0.0701	0.0729	1024.44	159.043	23.5355
8	124.51	16.223	5	9	2014	8	0	5	162	23.4732	34.9799	0.1491	0.133	5.06301	0.0709	0.0746	1024.48	161.03	23.4396
8	124.51	16.223	5	9	2014	8	0	5	164	23.1341	34.976	0.1386	0.134	5.06941	0.0698	0.0748	1024.59	163.018	23.1005
8	124.51	16.223	5	9	2014	8	0	5	166	22.6574	34.9773	0.1409	0.131	5.05997	0.0702	0.0742	1024.73	165.004	22.6239
8	124.51	16.223	5	9	2014	8	0	5	168	22.4756	34.9915	0.0998	0.136	5.03141	0.066	0.0752	1024.81	166.992	22.4418
8	124.51	16.223	5	9	2014	8	0	5	170	22.41	34.9877	0.0926	0.1292	5.02064	0.0653	0.0738	1024.83	168.98	22.3759
8	124.51	16.223	5	9	2014	8	0	5	172	22.3389	34.9832	0.1029	0.1316	5.03681	0.0663	0.0744	1024.86	170.966	22.3045
8	124.51	16.223	5	9	2014	8	0	5	174	22.23	34.9951	0.0814	0.1258	5.02784	0.0641	0.0732	1024.9	172.953	22.1953
8	124.51	16.223	5	9	2014	8	0	5	176	22.0835	35.0233	0.0716	0.1253	4.9391	0.0632	0.0731	1024.98	174.941	22.0486
8	124.51	16.223	5	9	2014	8	0	5	178	21.9009	35.0167	0.0478	0.1263	4.9158	0.0607	0.0733	1025.03	176.928	21.8658
8	124.51	16.223	5	9	2014	8	0	5	180	21.8504	35.014	0.0614	0.1222	4.91124	0.0622	0.0724	1025.05	178.915	21.815
8	124.51	16.223	5	9	2014	8	0	5	182	21.7371	35.008	0.0481	0.1208	4.91956	0.0608	0.0722	1025.09	180.902	21.7014
8	124.51	16.223	5	9	2014	8	0	5	184	21.628	35.0044	0.035	0.1323	4.92757	0.0595	0.0745	1025.12	182.889	21.592
8	124.51	16.223	5	9	2014	8	0	5	186	21.4074	34.9851	0.0338	0.1264	4.97618	0.0594	0.0733	1025.18	184.876	21.3713
8	124.51	16.223	5	9	2014	8	0	5	188	21.1443	34.9558	0.0159	0.1254	5.08327	0.0576	0.0731	1025.24	186.863	21.1082
8	124.51	16.223	5	9	2014	8	0	5	190	20.9597	34.9401	0.0077	0.1246	5.15867	0.0568	0.0729	1025.29	188.851	20.9234
8	124.51	16.223	5	9	2014	8	0	5	192	20.9161	34.9367	0.0148	0.116	5.17696	0.0575	0.0712	1025.3	190.836	20.8795
8	124.51	16.223	5	9	2014	8	0	5	194	20.8297	34.9302	0.0041	0.124	5.20264	0.0564	0.0728	1025.33	192.824	20.7928
8	124.51	16.223	5	9	2014	8	0	5	196	20.6163	34.9129		0.1253	5.24696	0.0543	0.0731	1025.38	194.811	20.5793
8	124.51	16.223	5	9	2014	8	0	5	198	20.4676	34.9027		0.1198	5.27709	0.0532	0.072	1025.43	196.798	20.4304
8	124.51	16.223	5	9	2014	8	0	5	200	20.3022	34.8961		0.1234	5.28957	0.0532	0.0727	1025.47	198.785	20.2648
8	124.51	16.223	5	9	2014	8	0	5	202	20.2162	34.8903		0.1253	5.2861	0.0524	0.0731	1025.5	200.77	20.1786
8	124.51	16.223	5	9	2014	8	0	5	204	20.1458	34.886		0.1167	5.28952	0.051	0.0713	1025.53	202.759	20.1079
8	124.51	16.223	5	9	2014	8	0	5	206	20.0596	34.8788		0.1219	5.30757	0.0516	0.0724	1025.55	204.745	20.0214
8	124.51	16.223	5	9	2014	8	0	5	208	19.9772	34.8707		0.1196	5.33346	0.0519	0.0719	1025.58	206.733	19.9388
8	124.51	16.223	5	9	2014	8	0	5	210	19.8642	34.8666		0.1263	5.36245	0.0519	0.0733	1025.61	208.719	19.8256
8	124.51	16.223	5	9	2014	8	0	5	212	19.7562	34.8758		0.1221	5.33297	0.0513	0.0724	1025.66	210.705	19.7173
8	124.51	16.223	5	9	2014	8	0	5	214	19.6308	34.8659		0.1209	5.32145	0.0509	0.0722	1025.69	212.692	19.5918
8	124.51	16.223	5	9	2014	8	0	5	216	19.5178	34.8581		0.1247	5.36157	0.0507	0.0729	1025.72	214.68	19.4785
8	124.51	16.223	5	9	2014	8	0	5	218	19.3574	34.8416		0.1163	5.41234	0.0512	0.0712	1025.76	216.665	19.318
8	124.51	16.223	5	9	2014	8	0	5	220	19.258	34.8321		0.1221	5.45201	0.0505	0.0724	1025.79	218.653	19.2185
8	124.51	16.223	5	9	2014	8	0	5	222	19.1647	34.8283		0.1202	5.48448	0.0503	0.072	1025.82	220.639	19.1249
8	124.51	16.223	5	9	2014	8	0	5	224	18.9966	34.8226		0.1223	5.50015	0.0498	0.0725	1025.87	222.626	18.9566
8	124.51	16.223	5	9	2014	8	0	5	226	18.5869	34.7867		0.1252	5.5876	0.0491	0.073	1025.95	224.613	18.5472
8	124.51	16.223	5	9	2014	8	0	5	228	18.401	34.7729		0.1193	5.68724	0.0496	0.0718	1026	226.599	18.3613
8	124.51	16.223	5	9	2014	8	0	5	230	18.3222	34.7689		0.1214	5.73309	0.05	0.0723	1026.02	228.586	18.2822
8	124.51	16.223	5	9	2014	8	0	5	232	18.288	34.7683		0.1213	5.75084	0.0495	0.0723	1026.04	230.572	18.2478
8	124.51	16.223	5	9	2014	8	0	5	234	18.2562	34.7673		0.1214	5.76805	0.0496	0.0723	1026.06	232.559	18.2157
8	124.51	16.223	5	9	2014	8	0	5	236	18.2203	34.7663		0.1215	5.76963	0.0489	0.0723	1026.07	234.545	18.1794
8	124.51	16.223	5	9	2014	8	0	5	238	18.1702	34.763		0.1245	5.78284	0.0498	0.0729	1026.09	236.532	18.1291
8	124.51	16.223	5	9	2014	8	0	5	240	18.1176	34.7601		0.122	5.79839	0.0496	0.0724	1026.11	238.518	18.0762
8	124.51	16.223	5	9	2014	8	0	5	242	18.0411	34.756		0.1231	5.80651	0.0482	0.0726	1026.14	240.505	17.9995
8	124.51	16.223	5	9	2014	8	0	5	244	17.9772	34.7525			5.8135	0.0485		1026.16	242.492	17.9353
8	124.51	16.223	5	9	2014	8	0	5	246	17.9368	34.7504		0.1212	5.82988	0.0485	0.0723	1026.18	244.478	17.8947
8	124.51	16.223	5	9	2014	8	0	5	248	17.9282	34.75		0.1235	5.83559	0.0502	0.0727	1026.19	246.464	17.8857
8	124.51	16.223	5	9	2014	8	0	5	250	17.897	34.7483		0.1222	5.83223	0.0492	0.0724	1026.2	248.451	17.8543
8	124.51	16.223	5	9	2014	8	0	5	252	17.8351	34.7445		0.1187	5.8503	0.0492	0.0717	1026.22	250.437	17.7921
8	124.51	16.223	5	9	2014	8	0	5	254	17.7802	34.7416		0.1265	5.85703	0.0488	0.0733	1026.24	252.424	17.737
8	124.51	16.223	5	9	2014	8	0	5	256	17.7549	34.7404		0.1262	5.85883	0.0492	0.0733	1026.26	254.41	17.7113
8	124.51	16.223	5	9	2014	8	0	5	258	17.7266	34.739		0.1221	5.84603	0.0491	0.0724	1026.27	256.396	17.6828
8	124.51	16.223	5	9	2014	8	0	5	260	17.7044	34.7381		0.1237	5.8451	0.0492	0.0727	1026.28	258.383	17.6602
8	124.51	16.223	5	9	2014	8	0	5	262	17.684	34.7369		0.1202	5.84205		0.072	1026.3	260.369	17.6396
8	124.51	16.223	5	9	2014	8	0	5	264	17.6442	34.7346		0.1316	5.83623	0.0492	0.0744	1026.31	262.355	17.5995
8	124.51	16.223	5	9	2014	8	0	5	266	17.5495	34.7286		0.1231	5.8507	0.0492	0.0726	1026.34	264.341	17.5047
8	124.51	16.223	5	9	2014	8	0	5	268	17.4991	34.7262		0.1206	5.84669	0.0484	0.0721	1026.36	266.328	17.454
8	124.51	16.223	5	9	2014	8	0	5	270	17.4739	34.725		0.1212	5.83323	0.0477	0.0722	1026.38	268.314	17.4285
8	124.51	16.223	5	9	2014	8	0	5	272	17.3913	34.7198		0.1293	5.81521	0.0474	0.0739	1026.4	270.3	17.3457
8	124.51	16.223	5	9	2014	8	0	5	274	17.3443	34.7174		0.1238	5.80166	0.0485	0.0728	1026.42	272.286	17.2984
8	124.51	16.223	5	9	2014	8	0	5	276	17.3159	34.7161		0.1174	5.79962	0.0479	0.0715	1026.43	274.273	17.2698
8	124.51	16.223	5	9	2014	8	0	5	278	17.27	34.713		0.1208	5.80574	0.0489	0.0722	1026.45	276.259	17.2236
8	124.51	16.223	5	9	2014	8	0	5	280	17.2325	34.711		0.1211	5.78003	0.0484	0.0722	1026.47	278.245	17.1859
8	124.51	16.223	5	9	2014	8	0	5	282	17.183	34.7074		0.1152	5.77532	0.0479	0.071	1026.49	280.231	17.1361
8	124.51	16.223	5	9	2014	8	0	5	284	17.0935	34.7019		0.1234	5.76293	0.049	0.0727	1026.51	282.217	17.0464
8	124.51	16.223	5	9	2014	8	0	5	286	17.0685	34.7006		0.1243	5.75604	0.048	0.0729	1026.53	284.203	17.0212
8	124.51	16.223	5	9	2014	8	0	5	288	17.043	34.699		0.1198	5.74425	0.0484	0.072	1026.54	286.189	16.9953
8	124.51	16.223	5	9	2014	8	0	5	290	17.003	34.6961		0.1246	5.75257	0.049	0.0729	1026.56	288.175	16.9551
8	124.51	16.223	5	9	2014	8	0	5	292	16.9177	34.6899		0.1191	5.72353	0.0494	0.0718	1026.58	290.161	16.8697
8	124.51	16.223	5	9	2014	8	0	5	294	16.8557	34.6857		0.125	5.71487	0.049	0.073	1026.6	292.147	16.8075
8	124.51	16.223	5	9	2014	8	0	5	296	16.7642	34.6786		0.1237	5.69607	0.0501	0.0728	1026.63	294.133	16.7157
8	124.51	16.223	5	9	2014	8	0	5	298	16.6715	34.6726		0.1184	5.66334	0.0483	0.0717	1026.65	296.119	16.623
8	124.51	16.223	5	9	2014	8	0	5	300	16.599	34.6668		0.1268	5.65424	0.0493	0.0734	1026.67	298.105	16.5503
8	124.51	16.223	5	9	2014	8	0	5	302	16.5065	34.6604		0.1259	5.62683	0.0491	0.0732	1026.7	300.091	16.4577
8	124.51	16.223	5	9	2014	8	0	5	304	16.4397	34.6559		0.1217	5.59065	0.0486	0.0723	1026.72	302.077	16.3906
8	124.51	16.223	5	9	2014	8	0	5	306	16.4093	34.654		0.1168	5.5762	0.0489	0.0714	1026.74	304.063	16.36
8	124.51	16.223	5	9	2014	8	0	5	308	16.3958	34.6531		0.1198	5.56461	0.0483	0.072	1026.75	306.049	16.3462
8	124.51	16.223	5	9	2014	8	0	5	310	16.3479	34.649		0.1235	5.56671	0.0488	0.0727	1026.76	308.034	16.298
8	124.51	16.223	5	9	2014	8	0	5	312	16.2233	34.6396		0.1239	5.52877	0.0486	0.0728	1026.79	310.02	16.1735
8	124.51	16.223	5	9	2014	8	0	5	314	16.154	34.6341		0.1258	5.50496	0.049	0.0732	1026.82	312.006	16.1039
8	124.51	16.223	5	9	2014	8	0	5	316	16.0426	34.6261		0.1241	5.47885	0.0492	0.0728	1026.84	313.991	15.9924
8	124.51	16.223	5	9	2014	8	0	5	318	15.9568	34.6196		0.1275	5.46195	0.0481	0.0735	1026.87	315.978	15.9065
8	124.51	16.223	5	9	2014	8	0	5	320	15.8576	34.612		0.1251	5.44695	0.0486	0.073	1026.89	317.963	15.8073
8	124.51	16.223	5	9	2014	8	0	5	322	15.7568	34.6046		0.1269	5.4238	0.0489	0.0734	1026.92	319.949	15.7064
8	124.51	16.223	5	9	2014	8	0	5	324	15.6329	34.5945		0.1244	5.40239	0.0488	0.0729	1026.95	321.935	15.5824
8	124.51	16.223	5	9	2014	8	0	5	326	15.4267	34.5811		0.1235	5.39207	0.0486	0.0727	1027	323.92	15.3763
8	124.51	16.223	5	9	2014	8	0	5	328	15.4235	34.5813		0.1222	5.37906	0.0492	0.0725	1027.01	325.907	15.3728
8	124.51	16.223	5	9	2014	8	0	5	330	15.3855	34.5792		0.1252	5.37802	0.0492	0.0731	1027.02	327.891	15.3347
8	124.51	16.223	5	9	2014	8	0	5	332	15.3354	34.5758		0.1242	5.38188	0.0494	0.0728	1027.04	329.878	15.2843
8	124.51	16.223	5	9	2014	8	0	5	334	15.2434	34.5687		0.1231	5.38087	0.0484	0.0726	1027.06	331.862	15.1922
8	124.51	16.223	5	9	2014	8	0	5	336	15.1409	34.5614		0.0597	5.35103	0.0489	0.0733	1027.09	333.849	15.0896
8	124.51	16.223	5	9	2014	8	0	5	338	15.0685	34.5563		0.116	5.34791	0.0482	0.0716	1027.11	335.834	15.0171
8	124.51	16.223	5	9	2014	8	0	5	340	14.9918	34.5508		0.1227	5.34629	0.0489	0.0725	1027.13	337.82	14.9404
8	124.51	16.223	5	9	2014	8	0	5	342	14.918	34.5457		0.1186	5.34105	0.0485	0.0717	1027.15	339.805	14.8664
8	124.51	16.223	5	9	2014	8	0	5	344	14.8714	34.5425		0.1238	5.32782	0.0499	0.0728	1027.17	341.791	14.8195
8	124.51	16.223	5	9	2014	8	0	5	346	14.8317	34.5398		0.1224	5.32077	0.05	0.0725	1027.19	343.776	14.7796
8	124.51	16.223	5	9	2014	8	0	5	348	14.8045	34.5379		0.0265	5.31581	0.0483	0.0716	1027.2	345.763	14.7522
9	124.33	15.862	5	9	2014	20	9	29	4	29.4861	34.367		0.106	5.4465	0.0483	0.0692	1021.44	3.943	29.4852
9	124.33	15.862	5	9	2014	20	9	29	6	29.4898	34.3661		0.1226	5.45606	0.0509	0.0725	1021.45	5.968	29.4883
9	124.33	15.862	5	9	2014	20	9	29	8	29.4899	34.3661		0.1212	5.46514	0.0506	0.0722	1021.46	7.955	29.488
9	124.33	15.862	5	9	2014	20	9	29	10	29.4891	34.3661		0.1181	5.45682	0.0506	0.0716	1021.47	9.944	29.4866
9	124.33	15.862	5	9	2014	20	9	29	12	29.4969	34.3676		0.1242	5.45935	0.0514	0.0728	1021.47	11.933	29.494
9	124.33	15.862	5	9	2014	20	9	29	14	29.4867	34.3834		0.1249	5.45666	0.0501	0.073	1021.5	13.921	29.4833
9	124.33	15.862	5	9	2014	20	9	29	16	29.3872	34.4654		0.1296	5.48033	0.0515	0.0739	1021.6	15.91	29.3833
9	124.33	15.862	5	9	2014	20	9	29	18	29.3031	34.5104		0.1278	5.48151	0.0506	0.0736	1021.67	17.898	29.2987
9	124.33	15.862	5	9	2014	20	9	29	20	29.2653	34.5137		0.1287	5.50104	0.0515	0.0738	1021.7	19.887	29.2605
9	124.33	15.862	5	9	2014	20	9	29	22	29.164	34.5233		0.1295	5.50075	0.0515	0.0739	1021.75	21.875	29.1586
9	124.33	15.862	5	9	2014	20	9	29	24	29.0946	34.5948		0.129	5.5218	0.0514	0.0738	1021.83	23.865	29.0887
9	124.33	15.862	5	9	2014	20	9	29	26	29.1112	34.6426		0.1186	5.53123	0.052	0.0717	1021.87	25.853	29.1049
9	124.33	15.862	5	9	2014	20	9	29	28	28.7541	34.6565		0.1282	5.56919	0.0515	0.0736	1022.01	27.841	28.7474
9	124.33	15.862	5	9	2014	20	9	29	30	28.5905	34.6643		0.1272	5.59663	0.0523	0.0735	1022.08	29.83	28.5834
9	124.33	15.862	5	9	2014	20	9	29	32	28.4084	34.7152		0.126	5.62599	0.0523	0.0732	1022.18	31.818	28.4008
9	124.33	15.862	5	9	2014	20	9	29	34	28.2592	34.7473		0.129	5.64286	0.0531	0.0738	1022.27	33.807	28.2511
9	124.33	15.862	5	9	2014	20	9	29	36	28.175	34.7729		0.1206	5.67004	0.0535	0.0721	1022.32	35.795	28.1665
9	124.33	15.862	5	9	2014	20	9	29	38	28.1045	34.8065		0.1246	5.66451	0.0538	0.0729	1022.38	37.784	28.0955
9	124.33	15.862	5	9	2014	20	9	29	40	28.0407	34.8238		0.1302	5.66417	0.0537	0.0741	1022.42	39.772	28.0313
9	124.33	15.862	5	9	2014	20	9	29	42	27.9891	34.8333		0.1352	5.69002	0.0537	0.075	1022.45	41.761	27.9792
9	124.33	15.862	5	9	2014	20	9	29	44	27.9241	34.8488		0.1294	5.68932	0.0516	0.0739	1022.49	43.749	27.9138
9	124.33	15.862	5	9	2014	20	9	29	46	27.912	34.8622		0.1237	5.69826	0.0541	0.0727	1022.52	45.737	27.9012
9	124.33	15.862	5	9	2014	20	9	29	48	27.8927	34.8712		0.1292	5.70797	0.0536	0.0738	1022.54	47.726	27.8814
9	124.33	15.862	5	9	2014	20	9	29	50	27.8406	34.8726		0.1263	5.70201	0.0533	0.0733	1022.57	49.714	27.8289
9	124.33	15.862	5	9	2014	20	9	29	52	27.7693	34.8659		0.1294	5.706	0.0546	0.0739	1022.59	51.703	27.7572
9	124.33	15.862	5	9	2014	20	9	29	54	27.7642	34.8764		0.1292	5.70473	0.0535	0.0739	1022.61	53.69	27.7515
9	124.33	15.862	5	9	2014	20	9	29	56	27.742	34.8812		0.1222	5.6974	0.0535	0.0724	1022.63	55.679	27.7289
9	124.33	15.862	5	9	2014	20	9	29	58	27.7357	34.8813		0.1225	5.70761	0.0531	0.0725	1022.64	57.668	27.7221
9	124.33	15.862	5	9	2014	20	9	29	60	27.7245	34.8809		0.1264	5.71207	0.0551	0.0733	1022.65	59.655	27.7105
9	124.33	15.862	5	9	2014	20	9	29	62	27.6896	34.8808		0.1303	5.70892	0.0554	0.0741	1022.67	61.644	27.6751
9	124.33	15.862	5	9	2014	20	9	29	64	27.6484	34.8802		0.1272	5.72059	0.0546	0.0736	1022.69	63.632	27.6335
9	124.33	15.862	5	9	2014	20	9	29	66	27.5526	34.8791		0.1253	5.73744	0.0537	0.0726	1022.73	65.62	27.5372
9	124.33	15.862	5	9	2014	20	9	29	68	27.4931	34.8805		0.1263	5.76526	0.054	0.0733	1022.76	67.608	27.4773
9	124.33	15.862	5	9	2014	20	9	29	70	27.3523	34.8819		0.1281	5.79605	0.0546	0.0736	1022.82	69.596	27.3361
9	124.33	15.862	5	9	2014	20	9	29	72	27.2866	34.8917		0.1301	5.82337	0.0556	0.0741	1022.85	71.585	27.27
9	124.33	15.862	5	9	2014	20	9	29	74	27.2651	34.9027		0.1266	5.82776	0.0553	0.0733	1022.88	73.573	27.248
9	124.33	15.862	5	9	2014	20	9	29	76	27.1021	34.8903	0.0029	0.1291	5.82506	0.0563	0.0738	1022.93	75.561	27.0846
9	124.33	15.862	5	9	2014	20	9	29	78	27.0519	34.8836		0.1304	5.82006	0.0546	0.0741	1022.95	77.549	27.0339
9	124.33	15.862	5	9	2014	20	9	29	80	27.0092	34.8773		0.1326	5.81914	0.0556	0.0745	1022.97	79.537	26.9908
9	124.33	15.862	5	9	2014	20	9	29	82	26.9395	34.8786		0.1202	5.82146	0.0555	0.072	1023	81.525	26.9207
9	124.33	15.862	5	9	2014	20	9	29	84	26.8655	34.8827		0.1341	5.82725	0.0555	0.0748	1023.03	83.513	26.8463
9	124.33	15.862	5	9	2014	20	9	29	86	26.8328	34.8859	0.0131	0.1284	5.81069	0.0573	0.0737	1023.05	85.501	26.8132
9	124.33	15.862	5	9	2014	20	9	29	88	26.7797	34.8862		0.1324	5.80474	0.0558	0.0745	1023.08	87.489	26.7597
9	124.33	15.862	5	9	2014	20	9	29	90	26.7141	34.8871	0.0105	0.1244	5.81485	0.0571	0.0729	1023.11	89.477	26.6936
9	124.33	15.862	5	9	2014	20	9	29	92	26.6647	34.8878	0.0032	0.1299	5.80528	0.0564	0.074	1023.13	91.465	26.6438
9	124.33	15.862	5	9	2014	20	9	29	94	26.6321	34.8894	0.0138	0.1262	5.8009	0.0574	0.0733	1023.15	93.453	26.6108
9	124.33	15.862	5	9	2014	20	9	29	96	26.5996	34.8895	0.0066	0.1298	5.79096	0.0567	0.074	1023.17	95.44	26.5778
9	124.33	15.862	5	9	2014	20	9	29	98	26.546	34.8903	0.013	0.132	5.77845	0.0573	0.0744	1023.2	97.429	26.5238
9	124.33	15.862	5	9	2014	20	9	29	100	26.4853	34.89	0.011	0.1355	5.77305	0.0571	0.0752	1023.23	99.416	26.4627
9	124.33	15.862	5	9	2014	20	9	29	102	26.4655	34.8918	0.019	0.1309	5.75812	0.0579	0.0742	1023.24	101.404	26.4424
9	124.33	15.862	5	9	2014	20	9	29	104	26.4322	34.8918	0.0275	0.131	5.75368	0.0587	0.0742	1023.26	103.392	26.4087
9	124.33	15.862	5	9	2014	20	9	29	106	26.3818	34.8917	0.0218	0.1247	5.72404	0.0582	0.0729	1023.29	105.38	26.3579
9	124.33	15.862	5	9	2014	20	9	29	108	26.3607	34.892	0.0259	0.1273	5.72093	0.0586	0.0734	1023.3	107.368	26.3364
9	124.33	15.862	5	9	2014	20	9	29	110	26.3214	34.8948	0.0264	0.1255	5.71217	0.0586	0.0731	1023.33	109.355	26.2967
9	124.33	15.862	5	9	2014	20	9	29	112	26.2987	34.8965	0.0205	0.1325	5.70794	0.0581	0.0745	1023.34	111.343	26.2735
9	124.33	15.862	5	9	2014	20	9	29	114	26.248	34.8953	0.0474	0.1332	5.68796	0.0607	0.0746	1023.37	113.331	26.2224
9	124.33	15.862	5	9	2014	20	9	29	116	26.2103	34.897	0.0355	0.1293	5.6841	0.0596	0.0739	1023.39	115.318	26.1842
9	124.33	15.862	5	9	2014	20	9	29	118	26.1219	34.8952	0.0445	0.1356	5.63934	0.0605	0.0751	1023.42	117.306	26.0955
9	124.33	15.862	5	9	2014	20	9	29	120	25.9701	34.8951	0.0552	0.1263	5.61651	0.0616	0.0733	1023.48	119.294	25.9433
9	124.33	15.862	5	9	2014	20	9	29	122	25.7739	34.9023	0.0538	0.1252	5.5538	0.0614	0.0731	1023.55	121.282	25.7468
9	124.33	15.862	5	9	2014	20	9	29	124	25.6753	34.9033	0.0721	0.1292	5.53189	0.0632	0.0739	1023.59	123.269	25.6479
9	124.33	15.862	5	9	2014	20	9	29	126	25.5402	34.9063	0.0804	0.1305	5.51495	0.064	0.0741	1023.65	125.257	25.5124
9	124.33	15.862	5	9	2014	20	9	29	128	25.4015	34.9071	0.1075	0.1361	5.494	0.0668	0.0752	1023.7	127.244	25.3735
9	124.33	15.862	5	9	2014	20	9	29	130	25.3017	34.9033	0.116	0.1248	5.48668	0.0676	0.0729	1023.74	129.232	25.2732
9	124.33	15.862	5	9	2014	20	9	29	132	25.1216	34.8993	0.1431	0.1312	5.44504	0.0703	0.0742	1023.8	131.219	25.0929
9	124.33	15.862	5	9	2014	20	9	29	134	25.0304	34.9036	0.178	0.132	5.39997	0.0738	0.0744	1023.84	133.207	25.0013
9	124.33	15.862	5	9	2014	20	9	29	136	24.9736	34.9081	0.2018	0.1167	5.37681	0.0762	0.0713	1023.87	135.194	24.9441
9	124.33	15.862	5	9	2014	20	9	29	138	24.709	34.9248	0.2766	0.127	5.31161	0.0836	0.0734	1023.97	137.182	24.6793
9	124.33	15.862	5	9	2014	20	9	29	140	24.5255	34.9373	0.3262	0.1277	5.22833	0.0886	0.0736	1024.04	139.169	24.4956
9	124.33	15.862	5	9	2014	20	9	29	142	24.4799	34.9418	0.3434	0.129	5.20917	0.0903	0.0738	1024.07	141.157	24.4496
9	124.33	15.862	5	9	2014	20	9	29	144	24.3889	34.9486	0.3156	0.1296	5.18602	0.0876	0.0739	1024.11	143.145	24.3583
9	124.33	15.862	5	9	2014	20	9	29	146	24.1543	34.9561	0.2791	0.1273	5.1381	0.0839	0.0735	1024.19	145.131	24.1234
9	124.33	15.862	5	9	2014	20	9	29	148	23.8115	34.9553	0.2535	0.1342	5.07314	0.0813	0.0749	1024.3	147.119	23.7805
9	124.33	15.862	5	9	2014	20	9	29	150	23.6314	34.955	0.196	0.1389	5.06105	0.0756	0.0758	1024.36	149.107	23.6001
9	124.33	15.862	5	9	2014	20	9	29	152	23.5801	34.9563	0.1954	0.128	5.04277	0.0755	0.0736	1024.39	151.094	23.5485
9	124.33	15.862	5	9	2014	20	9	29	154	23.5096	34.957	0.1865	0.1288	5.04747	0.0746	0.0738	1024.42	153.081	23.4776
9	124.33	15.862	5	9	2014	20	9	29	156	23.4173	34.9589	0.2081	0.1386	5.0383	0.0768	0.0757	1024.46	155.068	23.385
9	124.33	15.862	5	9	2014	20	9	29	158	23.3351	34.9613	0.1722	0.144	5.01968	0.0732	0.0768	1024.49	157.056	23.3025
9	124.33	15.862	5	9	2014	20	9	29	160	23.2707	34.9632	0.2087	0.1386	5.02211	0.0769	0.0758	1024.52	159.043	23.2377
9	124.33	15.862	5	9	2014	20	9	29	162	23.1789	34.9599	0.174	0.1347	5.04274	0.0734	0.075	1024.55	161.031	23.1456
9	124.33	15.862	5	9	2014	20	9	29	164	22.4922	34.9523	0.1645	0.1413	5.04051	0.0724	0.0763	1024.75	163.017	22.4592
9	124.33	15.862	5	9	2014	20	9	29	166	22.3947	34.9511	0.1166	0.1338	5.06188	0.0677	0.0748	1024.79	165.005	22.3615
9	124.33	15.862	5	9	2014	20	9	29	168	22.0667	34.947	0.1213	0.1265	5.05177	0.0681	0.0733	1024.89	166.992	22.0334
9	124.33	15.862	5	9	2014	20	9	29	170	21.9565	34.946	0.1012	0.1337	5.06246	0.0661	0.0748	1024.93	168.979	21.923
9	124.33	15.862	5	9	2014	20	9	29	172	21.8833	34.9445	0.1095	0.1356	5.06573	0.067	0.0751	1024.95	170.966	21.8494
9	124.33	15.862	5	9	2014	20	9	29	174	21.6546	34.9408	0.0904	0.1357	5.08824	0.065	0.0751	1025.02	172.953	21.6205
9	124.33	15.862	5	9	2014	20	9	29	176	21.4483	34.9363	0.0834	0.1269	5.11081	0.0643	0.0734	1025.09	174.941	21.4141
9	124.33	15.862	5	9	2014	20	9	29	178	21.2972	34.9356	0.0775	0.1273	5.10078	0.0637	0.0735	1025.14	176.928	21.2628
9	124.33	15.862	5	9	2014	20	9	29	180	21.1799	34.9334	0.0564	0.125	5.11727	0.0616	0.073	1025.18	178.915	21.1453
9	124.33	15.862	5	9	2014	20	9	29	182	21.0312	34.922	0.0599	0.1276	5.13559	0.062	0.0735	1025.22	180.902	20.9964
9	124.33	15.862	5	9	2014	20	9	29	184	20.819	34.9077	0.0433	0.1212	5.17832	0.0603	0.0722	1025.27	182.889	20.784
9	124.33	15.862	5	9	2014	20	9	29	186	20.7765	34.9052	0.0335	0.1299	5.19087	0.0593	0.074	1025.29	184.876	20.7411
9	124.33	15.862	5	9	2014	20	9	29	188	20.5102	34.8906	0.014	0.1248	5.22123	0.0574	0.073	1025.36	186.863	20.4748
9	124.33	15.862	5	9	2014	20	9	29	190	20.289	34.886		0.1157	5.22967	0.055	0.0711	1025.43	188.85	20.2535
9	124.33	15.862	5	9	2014	20	9	29	192	20.2873	34.8872		0.1266	5.23386	0.0543	0.0733	1025.44	190.837	20.2514
9	124.33	15.862	5	9	2014	20	9	29	194	20.2831	34.8878	0.0063	0.1331	5.23416	0.0566	0.0746	1025.45	192.824	20.2469
9	124.33	15.862	5	9	2014	20	9	29	196	20.2641	34.888		0.1254	5.23229	0.0547	0.0731	1025.46	194.811	20.2275
9	124.33	15.862	5	9	2014	20	9	29	198	20.2536	34.8883		0.1312	5.22588	0.0558	0.0742	1025.47	196.798	20.2166
9	124.33	15.862	5	9	2014	20	9	29	200	20.2499	34.8883		0.124	5.22437	0.0546	0.0728	1025.48	198.785	20.2126
9	124.33	15.862	5	9	2014	20	9	29	202	20.2287	34.888	0.0015	0.1342	5.23687	0.0562	0.0749	1025.5	200.771	20.1911
9	124.33	15.862	5	9	2014	20	9	29	204	20.1566	34.8881		0.1311	5.22951	0.0538	0.0742	1025.52	202.758	20.1186
9	124.33	15.862	5	9	2014	20	9	29	206	20.0475	34.8899		0.118	5.20344	0.0531	0.0716	1025.56	204.745	20.0094
9	124.33	15.862	5	9	2014	20	9	29	208	20.0294	34.8901		0.1202	5.20528	0.0538	0.072	1025.58	206.732	19.9909
9	124.33	15.862	5	9	2014	20	9	29	210	20.0233	34.8901		0.1237	5.21047	0.0538	0.0727	1025.59	208.719	19.9845
9	124.33	15.862	5	9	2014	20	9	29	212	19.9754	34.89		0.1232	5.20817	0.0526	0.0726	1025.61	210.706	19.9362
9	124.33	15.862	5	9	2014	20	9	29	214	19.8418	34.8833		0.1177	5.22511	0.0519	0.0715	1025.65	212.693	19.8025
9	124.33	15.862	5	9	2014	20	9	29	216	19.4085	34.8496		0.125	5.28402	0.0516	0.073	1025.74	214.679	19.3695
9	124.33	15.862	5	9	2014	20	9	29	218	19.0236	34.821		0.1175	5.33927	0.0503	0.0715	1025.83	216.666	18.9847
9	124.33	15.862	5	9	2014	20	9	29	220	18.9015	34.8126		0.1287	5.37125	0.0493	0.0737	1025.87	218.652	18.8625
9	124.33	15.862	5	9	2014	20	9	29	222	18.737	34.8017		0.1168	5.3971	0.049	0.0714	1025.91	220.639	18.6978
9	124.33	15.862	5	9	2014	20	9	29	224	18.5918	34.7917		0.1201	5.43725	0.0506	0.072	1025.95	222.626	18.5524
9	124.33	15.862	5	9	2014	20	9	29	226	18.5003	34.7883		0.1138	5.45626	0.049	0.0707	1025.98	224.613	18.4608
9	124.33	15.862	5	9	2014	20	9	29	228	18.4296	34.789		0.1226	5.4463	0.0484	0.0725	1026	226.599	18.3898
9	124.33	15.862	5	9	2014	20	9	29	230	18.3339	34.7893		0.1213	5.40329	0.0484	0.0723	1026.04	228.586	18.2939
9	124.33	15.862	5	9	2014	20	9	29	232	18.1155	34.7791		0.1274	5.36662	0.0484	0.0735	1026.09	230.572	18.0755
9	124.33	15.862	5	9	2014	20	9	29	234	18.0511	34.7744		0.1177	5.36631	0.0488	0.0715	1026.11	232.559	18.0109
9	124.33	15.862	5	9	2014	20	9	29	236	17.9483	34.7654		0.1232	5.39701	0.0479	0.0726	1026.14	234.545	17.9079
9	124.33	15.862	5	9	2014	20	9	29	238	17.8397	34.7565		0.1232	5.43546	0.049	0.0726	1026.17	236.532	17.7991
9	124.33	15.862	5	9	2014	20	9	29	240	17.7815	34.7537		0.1148	5.43997	0.0488	0.071	1026.19	238.519	17.7406
9	124.33	15.862	5	9	2014	20	9	29	242	17.7395	34.7524		0.1242	5.41418	0.0487	0.0729	1026.21	240.504	17.6984
9	124.33	15.862	5	9	2014	20	9	29	244	17.6949	34.7516		0.1227	5.35131	0.0485	0.0726	1026.23	242.492	17.6535
9	124.33	15.862	5	9	2014	20	9	29	246	17.6719	34.7488		0.1241	5.35781	0.0486	0.0728	1026.24	244.478	17.6302
9	124.33	15.862	5	9	2014	20	9	29	248	17.6655	34.7488		0.1141	5.37613	0.0496	0.0708	1026.25	246.464	17.6235
9	124.33	15.862	5	9	2014	20	9	29	250	17.6325	34.7473		0.1198	5.35086	0.0484	0.0719	1026.27	248.451	17.5902
9	124.33	15.862	5	9	2014	20	9	29	252	17.5392	34.7414		0.1202	5.31509	0.0482	0.072	1026.29	250.437	17.4968
9	124.33	15.862	5	9	2014	20	9	29	254	17.3077	34.7238		0.1169	5.27586	0.0478	0.0713	1026.34	252.424	17.2653
9	124.33	15.862	5	9	2014	20	9	29	256	17.1263	34.707		0.1126	5.32737	0.0489	0.0705	1026.38	254.41	17.0838
9	124.33	15.862	5	9	2014	20	9	29	258	17.0795	34.7035		0.1276	5.39675	0.0485	0.0735	1026.4	256.396	17.0368
9	124.33	15.862	5	9	2014	20	9	29	260	16.9728	34.6933		0.121	5.4427	0.048	0.0722	1026.43	258.383	16.9299
9	124.33	15.862	5	9	2014	20	9	29	262	16.82	34.6815		0.12	5.52099	0.0485	0.072	1026.47	260.369	16.7771
9	124.33	15.862	5	9	2014	20	9	29	264	16.7032	34.6733		0.1178	5.52219	0.0481	0.0716	1026.5	262.355	16.6602
9	124.33	15.862	5	9	2014	20	9	29	266	16.5897	34.6662		0.114	5.52641	0.0495	0.0708	1026.53	264.341	16.5466
9	124.33	15.862	5	9	2014	20	9	29	268	16.5229	34.6623		0.1175	5.52774	0.0477	0.0715	1026.55	266.328	16.4795
9	124.33	15.862	5	9	2014	20	9	29	270	16.4784	34.6591		0.1189	5.50292	0.0481	0.0718	1026.56	268.314	16.4349
9	124.33	15.862	5	9	2014	20	9	29	272	16.4363	34.656		0.1185	5.47692	0.0491	0.0717	1026.58	270.3	16.3925
9	124.33	15.862	5	9	2014	20	9	29	274	16.369	34.6509		0.111	5.45189		0.0702	1026.6	272.286	16.325
9	124.33	15.862	5	9	2014	20	9	29	276	16.2191	34.6388		0.117	5.43588	0.0474	0.0714	1026.64	274.273	16.175
9	124.33	15.862	5	9	2014	20	9	29	278	16.1366	34.6336		0.1225	5.40832	0.0478	0.0725	1026.66	276.258	16.0924
9	124.33	15.862	5	9	2014	20	9	29	280	16.1249	34.6331		0.1186	5.4008	0.0492	0.0717	1026.67	278.245	16.0803
9	124.33	15.862	5	9	2014	20	9	29	282	16.109	34.6322		0.1148	5.39663	0.0493	0.0709	1026.68	280.231	16.0642
9	124.33	15.862	5	9	2014	20	9	29	284	16.0799	34.63		0.1151	5.39397	0.0476	0.071	1026.7	282.216	16.0348
9	124.33	15.862	5	9	2014	20	9	29	286	16.0052	34.6241		0.1165	5.37023	0.0494	0.0713	1026.72	284.203	15.9599
9	124.33	15.862	5	9	2014	20	9	29	288	15.9598	34.6205		0.1234	5.35102	0.0481	0.0727	1026.74	286.189	15.9143
9	124.33	15.862	5	9	2014	20	9	29	290	15.9392	34.6192		0.1145	5.35335	0.0491	0.0709	1026.75	288.175	15.8935
9	124.33	15.862	5	9	2014	20	9	29	292	15.9294	34.6185		0.1179	5.35333	0.0487	0.0716	1026.76	290.161	15.8834
9	124.33	15.862	5	9	2014	20	9	29	294	15.9224	34.6179		0.1201	5.36293	0.0491	0.072	1026.77	292.147	15.8761
9	124.33	15.862	5	9	2014	20	9	29	296	15.8927	34.6152		0.1186	5.35873	0.0487	0.0717	1026.78	294.133	15.8461
9	124.33	15.862	5	9	2014	20	9	29	298	15.8358	34.6103		0.1168	5.3462	0.0488	0.0713	1026.8	296.12	15.789
9	124.33	15.862	5	9	2014	20	9	29	300	15.7147	34.6002		0.1125	5.33434	0.0482	0.0705	1026.83	298.104	15.6678
9	124.33	15.862	5	9	2014	20	9	29	302	15.519	34.584		0.1171	5.30016	0.0489	0.0714	1026.87	300.091	15.4722
9	124.33	15.862	5	9	2014	20	9	29	304	15.3795	34.5758		0.1162	5.28199	0.0486	0.0712	1026.91	302.077	15.3327
9	124.33	15.862	5	9	2014	20	9	29	306	15.2758	34.5683		0.1154	5.27436	0.049	0.0711	1026.93	304.063	15.2289
9	124.33	15.862	5	9	2014	20	9	29	308	15.2582	34.5678		0.1191	5.26549	0.0479	0.0718	1026.94	306.049	15.211
9	124.33	15.862	5	9	2014	20	9	29	310	15.1434	34.5596		0.1158	5.26978	0.0484	0.0711	1026.97	308.034	15.0961
9	124.33	15.862	5	9	2014	20	9	29	312	14.9515	34.5467		0.1172	5.228	0.0496	0.0714	1027.01	310.02	14.9044
9	124.33	15.862	5	9	2014	20	9	29	314	14.8794	34.5424		0.1147	5.20649	0.0497	0.0709	1027.04	312.006	14.8321
9	124.33	15.862	5	9	2014	20	9	29	316	14.8199	34.5384		0.1137	5.19429	0.0499	0.0707	1027.06	313.992	14.7725
9	124.33	15.862	5	9	2014	20	9	29	318	14.7976	34.5369		0.1158	5.20578	0.0483	0.0711	1027.07	315.978	14.7499
9	124.33	15.862	5	9	2014	20	9	29	320	14.7231	34.5299		0.1144	5.22268	0.0487	0.0709	1027.09	317.963	14.6752
9	124.33	15.862	5	9	2014	20	9	29	322	14.56	34.5149		0.1229	5.17901	0.0487	0.0726	1027.12	319.949	14.5122
9	124.33	15.862	5	9	2014	20	9	29	324	14.4317	34.5031		0.1248	5.11152	0.0481	0.073	1027.15	321.934	14.3839
9	124.33	15.862	5	9	2014	20	9	29	326	14.334	34.4981		0.1209	5.1111	0.0487	0.0722	1027.17	323.921	14.2862
9	124.33	15.862	5	9	2014	20	9	29	328	14.2972	34.4972		0.1091	5.11934	0.0486	0.0698	1027.19	325.906	14.2491
9	124.33	15.862	5	9	2014	20	9	29	330	14.2724	34.4962		0.1255	5.1148	0.047	0.0731	1027.2	327.892	14.224
9	124.33	15.862	5	9	2014	20	9	29	332	14.2432	34.4955		0.129	5.12629	0.0488	0.0738	1027.22	329.877	14.1947
9	124.33	15.862	5	9	2014	20	9	29	334	14.2252	34.495		0.1152	5.14252	0.0486	0.071	1027.23	331.863	14.1764
9	124.33	15.862	5	9	2014	20	9	29	336	14.1766	34.4916		0.1211	5.14426	0.0485	0.0722	1027.25	333.849	14.1276
9	124.33	15.862	5	9	2014	20	9	29	338	14.1489	34.4895		0.1223	5.12855	0.0498	0.0725	1027.26	335.834	14.0997
9	124.33	15.862	5	9	2014	20	9	29	340	14.1064	34.4857		0.1185	5.1236	0.0481	0.0717	1027.28	337.82	14.057
9	124.33	15.862	5	9	2014	20	9	29	342	13.975	34.4726		0.0345	5.07852	0.0484	0.0719	1027.3	339.806	13.9256
9	124.33	15.862	5	9	2014	20	9	29	344	13.6467	34.4472		0.1287	4.92987	0.0495	0.0724	1027.36	341.793	13.5978
9	124.33	15.862	5	9	2014	20	9	29	346	13.5591	34.445		0.1465		0.0487	0.0773	1027.39	343.775	13.5102
10	124.03	15.345	5	10	2014	15	4	57	4	29.7909	34.0254		0.1148	5.38166	0.0509	0.0709	1021.08	3.977	29.7899
10	124.03	15.345	5	10	2014	15	4	57	6	29.7921	34.1317		0.1144	5.40269	0.0507	0.0709	1021.17	5.966	29.7906
10	124.03	15.345	5	10	2014	15	4	57	8	29.7929	34.1331		0.1162	5.54084	0.0494	0.0712	1021.18	7.955	29.7909
10	124.03	15.345	5	10	2014	15	4	57	10	29.793	34.1329		0.1132	5.54954	0.05	0.0706	1021.19	9.944	29.7905
10	124.03	15.345	5	10	2014	15	4	57	12	29.7735	34.1303		0.1133	5.55413	0.0503	0.0706	1021.2	11.932	29.7706
10	124.03	15.345	5	10	2014	15	4	57	14	29.7652	34.1293		0.1179	5.56237	0.0497	0.0716	1021.21	13.921	29.7618
10	124.03	15.345	5	10	2014	15	4	57	16	29.7305	34.126		0.1187	5.55832	0.0507	0.0717	1021.23	15.91	29.7266
10	124.03	15.345	5	10	2014	15	4	57	18	29.7041	34.1239		0.1141	5.56644	0.0507	0.0708	1021.25	17.898	29.6997
10	124.03	15.345	5	10	2014	15	4	57	20	29.6897	34.1235		0.1121	5.57513	0.0503	0.0704	1021.26	19.887	29.6848
10	124.03	15.345	5	10	2014	15	4	57	22	29.6796	34.1224		0.1186	5.62403		0.0717	1021.27	21.875	29.6742
10	124.03	15.345	5	10	2014	15	4	57	24	29.4971	34.1404		0.116	5.63849	0.05	0.0712	1021.35	23.865	29.4912
10	124.03	15.345	5	10	2014	15	4	57	26	29.0826	34.2425		0.1167	5.71019	0.0504	0.0713	1021.58	25.853	29.0764
10	124.03	15.345	5	10	2014	15	4	57	28	28.8567	34.3198		0.12	5.75229	0.0522	0.072	1021.72	27.841	28.85
10	124.03	15.345	5	10	2014	15	4	57	30	28.6815	34.4029		0.1139	5.77298	0.0517	0.0708	1021.85	29.83	28.6743
10	124.03	15.345	5	10	2014	15	4	57	32	28.5972	34.4512		0.1177	5.80246	0.0523	0.0715	1021.92	31.819	28.5896
10	124.03	15.345	5	10	2014	15	4	57	34	28.5063	34.4766		0.1117	5.79768	0.0512	0.0703	1021.98	33.807	28.4982
10	124.03	15.345	5	10	2014	15	4	57	36	28.4595	34.4967		0.1198	5.80407	0.0505	0.0719	1022.02	35.796	28.4509
10	124.03	15.345	5	10	2014	15	4	57	38	28.4604	34.5533		0.1146	5.82533	0.0517	0.0709	1022.07	37.783	28.4513
10	124.03	15.345	5	10	2014	15	4	57	40	28.3747	34.6548		0.1136	5.83435	0.052	0.0707	1022.18	39.773	28.3652
10	124.03	15.345	5	10	2014	15	4	57	42	28.3829	34.7761		0.1246	5.8202	0.0515	0.0729	1022.28	41.76	28.3729
10	124.03	15.345	5	10	2014	15	4	57	44	28.3396	34.8164		0.1129	5.83424	0.0517	0.0706	1022.33	43.749	28.3292
10	124.03	15.345	5	10	2014	15	4	57	46	28.2414	34.8104		0.1172	5.8482	0.0523	0.0715	1022.37	45.737	28.2305
10	124.03	15.345	5	10	2014	15	4	57	48	28.1556	34.819			5.84243	0.0521		1022.41	47.727	28.1442
10	124.03	15.345	5	10	2014	15	4	57	50	28.1202	34.8231		0.1177	5.84981	0.0516	0.0715	1022.44	49.713	28.1083
10	124.03	15.345	5	10	2014	15	4	57	52	28.0795	34.8266		0.1082	5.84701	0.0515	0.0696	1022.46	51.703	28.0672
10	124.03	15.345	5	10	2014	15	4	57	54	28.0304	34.8379		0.1179	5.84658	0.052	0.0715	1022.49	53.691	28.0177
10	124.03	15.345	5	10	2014	15	4	57	56	28.0028	34.8416		0.1105	5.86998	0.0524	0.0701	1022.51	55.679	27.9896
10	124.03	15.345	5	10	2014	15	4	57	58	27.9548	34.8395		0.118	5.85527	0.053	0.0716	1022.54	57.668	27.9412
10	124.03	15.345	5	10	2014	15	4	57	60	27.8931	34.8343		0.1078	5.86603	0.0508	0.0696	1022.56	59.654	27.879
10	124.03	15.345	5	10	2014	15	4	57	62	27.8369	34.827		0.1112	5.88337	0.0518	0.0702	1022.58	61.644	27.8223
10	124.03	15.345	5	10	2014	15	4	57	64	27.7687	34.8266		0.1206	5.88512	0.0536	0.0721	1022.61	63.633	27.7537
10	124.03	15.345	5	10	2014	15	4	57	66	27.6893	34.8222		0.1136	5.88962	0.0537	0.0707	1022.64	65.62	27.6738
10	124.03	15.345	5	10	2014	15	4	57	68	27.6545	34.8317		0.1126	5.88306	0.0511	0.0705	1022.67	67.609	27.6386
10	124.03	15.345	5	10	2014	15	4	57	70	27.6451	34.8507		0.1134	5.90169	0.0532	0.0707	1022.7	69.596	27.6288
10	124.03	15.345	5	10	2014	15	4	57	72	27.503	34.8168		0.1206	5.90045	0.0528	0.0721	1022.73	71.585	27.4863
10	124.03	15.345	5	10	2014	15	4	57	74	27.4374	34.7976		0.1167	5.90629	0.0542	0.0713	1022.74	73.572	27.4203
10	124.03	15.345	5	10	2014	15	4	57	76	27.3993	34.8079		0.118	5.90636	0.0546	0.0716	1022.77	75.561	27.3817
10	124.03	15.345	5	10	2014	15	4	57	78	27.3092	34.8057		0.1165	5.91969	0.0539	0.0713	1022.81	77.549	27.2911
10	124.03	15.345	5	10	2014	15	4	57	80	27.2781	34.8108		0.116	5.92468	0.0547	0.0712	1022.83	79.537	27.2596
10	124.03	15.345	5	10	2014	15	4	57	82	27.2102	34.8115		0.1157	5.92425	0.0558	0.0711	1022.86	81.525	27.1913
10	124.03	15.345	5	10	2014	15	4	57	84	27.0572	34.8214		0.1122	5.96917	0.0551	0.0704	1022.93	83.513	27.0379
10	124.03	15.345	5	10	2014	15	4	57	86	26.8873	34.8368		0.1149	5.96122	0.0557	0.071	1023	85.501	26.8677
10	124.03	15.345	5	10	2014	15	4	57	88	26.8005	34.851		0.1138	5.97007	0.0545	0.0707	1023.05	87.489	26.7805
10	124.03	15.345	5	10	2014	15	4	57	90	26.7182	34.8646	0.0022	0.1203	5.96721	0.056	0.072	1023.09	89.477	26.6977
10	124.03	15.345	5	10	2014	15	4	57	92	26.6885	34.879		0.1203	5.94874		0.0721	1023.12	91.465	26.6676
10	124.03	15.345	5	10	2014	15	4	57	94	26.7016	34.8947		0.1199	5.96447	0.056	0.072	1023.14	93.453	26.6802
10	124.03	15.345	5	10	2014	15	4	57	96	26.6708	34.8903		0.1086	5.97161	0.0547	0.0697	1023.15	95.44	26.649
10	124.03	15.345	5	10	2014	15	4	57	98	26.6246	34.901	0.0036	0.1223	5.97828	0.0564	0.0724	1023.18	97.429	26.6023
10	124.03	15.345	5	10	2014	15	4	57	100	26.5659	34.9006	0.0073	0.1137	5.98023	0.0567	0.0707	1023.21	99.416	26.5432
10	124.03	15.345	5	10	2014	15	4	57	102	26.4692	34.89	0.0253	0.1093	5.95862	0.0585	0.0699	1023.24	101.404	26.4461
10	124.03	15.345	5	10	2014	15	4	57	104	26.4369	34.8899	0.003	0.114	5.94863	0.0563	0.0708	1023.26	103.392	26.4134
10	124.03	15.345	5	10	2014	15	4	57	106	26.3896	34.89	0.0138	0.1185	5.94657	0.0574	0.0717	1023.28	105.38	26.3657
10	124.03	15.345	5	10	2014	15	4	57	108	26.3228	34.8885	0.0347	0.1172	5.94395	0.0595	0.0714	1023.31	107.368	26.2985
10	124.03	15.345	5	10	2014	15	4	57	110	26.251	34.8867	0.0368	0.1167	5.93194	0.0597	0.0713	1023.34	109.355	26.2263
10	124.03	15.345	5	10	2014	15	4	57	112	26.1776	34.8807	0.038	0.1141	5.91267	0.0598	0.0708	1023.37	111.343	26.1525
10	124.03	15.345	5	10	2014	15	4	57	114	26.1231	34.8773	0.0325	0.123	5.91113	0.0592	0.0726	1023.39	113.331	26.0975
10	124.03	15.345	5	10	2014	15	4	57	116	26.0347	34.8641	0.0421	0.1212	5.85603	0.0602	0.0722	1023.42	115.319	26.0088
10	124.03	15.345	5	10	2014	15	4	57	118	25.9833	34.8636	0.0515	0.1194	5.84791	0.0612	0.0719	1023.44	117.306	25.957
10	124.03	15.345	5	10	2014	15	4	57	120	25.8095	34.8709	0.0406	0.1273	5.80563	0.06	0.0734	1023.51	119.294	25.7828
10	124.03	15.345	5	10	2014	15	4	57	122	25.6978	34.8708	0.0576	0.1211	5.80037	0.0618	0.0722	1023.55	121.281	25.6708
10	124.03	15.345	5	10	2014	15	4	57	124	25.6074	34.8675	0.0655	0.1187	5.80824	0.0626	0.0717	1023.59	123.269	25.5801
10	124.03	15.345	5	10	2014	15	4	57	126	25.5275	34.8669	0.0754	0.1171	5.77033	0.0636	0.0714	1023.62	125.257	25.4998
10	124.03	15.345	5	10	2014	15	4	57	128	25.4994	34.867	0.0721	0.1153	5.78724	0.0632	0.071	1023.64	127.244	25.4713
10	124.03	15.345	5	10	2014	15	4	57	130	25.4433	34.8678	0.0675	0.119	5.77802	0.0628	0.0718	1023.67	129.232	25.4148
10	124.03	15.345	5	10	2014	15	4	57	132	25.3139	34.8671	0.0814	0.1151	5.7695	0.0641	0.071	1023.71	131.219	25.285
10	124.03	15.345	5	10	2014	15	4	57	134	25.229	34.8674	0.0969	0.1227	5.75207	0.0657	0.0726	1023.75	133.207	25.1998
10	124.03	15.345	5	10	2014	15	4	57	136	25.2084	34.8689	0.1051	0.1201	5.74744	0.0665	0.072	1023.76	135.195	25.1787
10	124.03	15.345	5	10	2014	15	4	57	138	25.111	34.875	0.1149	0.1212	5.73623	0.0675	0.0722	1023.81	137.182	25.081
10	124.03	15.345	5	10	2014	15	4	57	140	24.9019	34.9107	0.2132	0.1186	5.59493	0.0773	0.0717	1023.91	139.17	24.8716
10	124.03	15.345	5	10	2014	15	4	57	142	24.8032	34.9342	0.3265	0.1202	5.50967	0.0886	0.072	1023.96	141.157	24.7726
10	124.03	15.345	5	10	2014	15	4	57	144	24.5587	34.9615	0.5206	0.1247	5.40344	0.1081	0.0729	1024.07	143.145	24.5278
10	124.03	15.345	5	10	2014	15	4	57	146	24.2544	34.9875	0.522	0.1236	5.30408	0.1082	0.0727	1024.19	145.132	24.2234
10	124.03	15.345	5	10	2014	15	4	57	148	23.8504	34.9858	0.4589	0.1237	5.23763	0.1019	0.0728	1024.31	147.119	23.8194
10	124.03	15.345	5	10	2014	15	4	57	150	23.4216	34.9793	0.4015	0.1308	5.24674	0.0962	0.0742	1024.44	149.106	23.3906
10	124.03	15.345	5	10	2014	15	4	57	152	23.0794	34.9892	0.3334	0.127	5.17877	0.0893	0.0734	1024.56	151.094	23.0482
10	124.03	15.345	5	10	2014	15	4	57	154	23.0136	34.9941	0.3016	0.1264	5.15835	0.0862	0.0733	1024.59	153.081	22.9822
10	124.03	15.345	5	10	2014	15	4	57	156	22.9784	34.9988	0.308	0.1273	5.16815	0.0868	0.0735	1024.61	155.068	22.9465
10	124.03	15.345	5	10	2014	15	4	57	158	22.9153	35.0015	0.2816	0.1215	5.1509	0.0842	0.0723	1024.64	157.058	22.8831
10	124.03	15.345	5	10	2014	15	4	57	160	22.867	35.0025	0.2817	0.1204	5.13592	0.0841	0.0721	1024.67	159.041	22.8344
10	124.03	15.345	5	10	2014	15	4	57	162	22.7828	35.0013	0.2615	0.1266	5.13869	0.0821	0.0733	1024.7	161.03	22.7499
10	124.03	15.345	5	10	2014	15	4	57	164	22.6231	34.9991	0.24	0.1231	5.13299	0.08	0.0726	1024.75	163.018	22.59
10	124.03	15.345	5	10	2014	15	4	57	166	22.291	34.9859	0.2302	0.124	5.16005	0.079	0.0728	1024.84	165.005	22.2578
10	124.03	15.345	5	10	2014	15	4	57	168	21.9431	34.9714	0.1828	0.1194	5.1887	0.0743	0.0719	1024.94	166.992	21.91
10	124.03	15.345	5	10	2014	15	4	57	170	21.686	34.9634	0.1706	0.1248	5.19979	0.0731	0.073	1025.02	168.979	21.6527
10	124.03	15.345	5	10	2014	15	4	57	172	21.4402	34.9623	0.1408	0.1161	5.19599	0.0701	0.0712	1025.09	170.967	21.4068
10	124.03	15.345	5	10	2014	15	4	57	174	21.3108	34.9578	0.1139	0.1173	5.21142	0.0674	0.0714	1025.13	172.953	21.2772
10	124.03	15.345	5	10	2014	15	4	57	176	21.1295	34.9523	0.1141	0.1143	5.21566	0.0674	0.0708	1025.19	174.941	21.0957
10	124.03	15.345	5	10	2014	15	4	57	178	20.9655	34.9478	0.1015	0.1175	5.23109	0.0661	0.0715	1025.24	176.928	20.9315
10	124.03	15.345	5	10	2014	15	4	57	180	20.7944	34.9364	0.0718	0.1142	5.25992	0.0632	0.0708	1025.28	178.915	20.7602
10	124.03	15.345	5	10	2014	15	4	57	182	20.5024	34.913	0.0496	0.1169	5.32257	0.061	0.0713	1025.35	180.901	20.4682
10	124.03	15.345	5	10	2014	15	4	57	184	20.2715	34.8964	0.0318	0.1117	5.3798	0.0592	0.0703	1025.41	182.89	20.2372
10	124.03	15.345	5	10	2014	15	4	57	186	20.0011	34.8816	0.0081	0.1114	5.41273	0.0568	0.0703	1025.48	184.875	19.9667
10	124.03	15.345	5	10	2014	15	4	57	188	19.8769	34.8779		0.1139	5.43211	0.0549	0.0708	1025.52	186.863	19.8423
10	124.03	15.345	5	10	2014	15	4	57	190	19.711	34.8691		0.108	5.45154	0.053	0.0696	1025.57	188.85	19.6762
10	124.03	15.345	5	10	2014	15	4	57	192	19.5634	34.8609		0.1081	5.4666	0.0511	0.0696	1025.61	190.837	19.5285
10	124.03	15.345	5	10	2014	15	4	57	194	19.397	34.8528		0.1063	5.49665	0.0509	0.0693	1025.65	192.824	19.362
10	124.03	15.345	5	10	2014	15	4	57	196	19.1868	34.8409		0.1126	5.49319	0.052	0.0705	1025.71	194.811	19.1517
10	124.03	15.345	5	10	2014	15	4	57	198	19.0472	34.8336		0.1064	5.496	0.0495	0.0693	1025.75	196.797	19.0119
10	124.03	15.345	5	10	2014	15	4	57	200	18.8746	34.8202		0.1131	5.5251	0.0503	0.0706	1025.79	198.785	18.8391
10	124.03	15.345	5	10	2014	15	4	57	202	18.7584	34.8095		0.1105	5.55788	0.0508	0.0701	1025.82	200.772	18.7227
10	124.03	15.345	5	10	2014	15	4	57	204	18.6856	34.8054		0.1107	5.58188	0.0502	0.0701	1025.85	202.758	18.6497
10	124.03	15.345	5	10	2014	15	4	57	206	18.5425	34.7945		0.1066	5.60902	0.0494	0.0693	1025.88	204.746	18.5064
10	124.03	15.345	5	10	2014	15	4	57	208	18.418	34.7887		0.1108	5.63334	0.049	0.0702	1025.92	206.732	18.3817
10	124.03	15.345	5	10	2014	15	4	57	210	18.3666	34.7872		0.1058	5.64704	0.0489	0.0692	1025.94	208.719	18.3301
10	124.03	15.345	5	10	2014	15	4	57	212	18.3173	34.7844		0.1095	5.65322	0.049	0.0699	1025.96	210.706	18.2804
10	124.03	15.345	5	10	2014	15	4	57	214	18.2394	34.7796		0.1084	5.66885	0.0492	0.0697	1025.98	212.693	18.2024
10	124.03	15.345	5	10	2014	15	4	57	216	18.1723	34.7754		0.1083	5.6845	0.049	0.0697	1026	214.679	18.135
10	124.03	15.345	5	10	2014	15	4	57	218	18.1079	34.7711		0.108	5.69273	0.049	0.0696	1026.03	216.666	18.0703
10	124.03	15.345	5	10	2014	15	4	57	220	18.0364	34.7662		0.1088	5.71101	0.0497	0.0698	1026.05	218.652	17.9986
10	124.03	15.345	5	10	2014	15	4	57	222	17.941	34.7602		0.1068	5.74578	0.0494	0.0694	1026.08	220.639	17.903
10	124.03	15.345	5	10	2014	15	4	57	224	17.8772	34.7555		0.1066	5.76073	0.0484	0.0693	1026.1	222.627	17.8389
10	124.03	15.345	5	10	2014	15	4	57	226	17.8481	34.7536		0.1065	5.7699	0.0492	0.0693	1026.11	224.611	17.8095
10	124.03	15.345	5	10	2014	15	4	57	228	17.8311	34.7525		0.1072	5.76795	0.0482	0.0694	1026.12	226.599	17.7922
10	124.03	15.345	5	10	2014	15	4	57	230	17.7705	34.7486		0.1099	5.76863	0.0489	0.07	1026.15	228.586	17.7314
10	124.03	15.345	5	10	2014	15	4	57	232	17.6639	34.7403		0.1105	5.77885	0.0483	0.0701	1026.17	230.574	17.6246
10	124.03	15.345	5	10	2014	15	4	57	234	17.6219	34.7382		0.1021	5.82662	0.0487	0.0684	1026.19	232.558	17.5824
10	124.03	15.345	5	10	2014	15	4	57	236	17.6102	34.7377		0.1064	5.84113	0.049	0.0693	1026.2	234.546	17.5703
10	124.03	15.345	5	10	2014	15	4	57	238	17.5991	34.7371		0.1061	5.85458	0.0479	0.0692	1026.21	236.532	17.5589
10	124.03	15.345	5	10	2014	15	4	57	240	17.5845	34.736		0.1083	5.85433	0.0485	0.0697	1026.23	238.518	17.544
10	124.03	15.345	5	10	2014	15	4	57	242	17.5596	34.7345		0.1075	5.87113	0.048	0.0695	1026.24	240.505	17.5188
10	124.03	15.345	5	10	2014	15	4	57	244	17.4927	34.7291		0.1091	5.88485	0.0497	0.0698	1026.26	242.491	17.4516
10	124.03	15.345	5	10	2014	15	4	57	246	17.4071	34.7239		0.1075	5.8907	0.0492	0.0695	1026.29	244.478	17.3659
10	124.03	15.345	5	10	2014	15	4	57	248	17.3489	34.7195		0.1115	5.90565	0.0483	0.0703	1026.31	246.464	17.3074
10	124.03	15.345	5	10	2014	15	4	57	250	17.2641	34.7139		0.106	5.9058	0.0479	0.0692	1026.33	248.451	17.2224
10	124.03	15.345	5	10	2014	15	4	57	252	17.2331	34.7116		0.1012	5.88398	0.048	0.0683	1026.35	250.437	17.1911
10	124.03	15.345	5	10	2014	15	4	57	254	17.2261	34.7112		0.111	5.87777	0.0487	0.0702	1026.36	252.423	17.1838
10	124.03	15.345	5	10	2014	15	4	57	256	17.2222	34.7108		0.1066	5.87184	0.048	0.0693	1026.36	254.41	17.1796
10	124.03	15.345	5	10	2014	15	4	57	258	17.218	34.7104		0.1117	5.84435	0.0491	0.0703	1026.37	256.396	17.175
10	124.03	15.345	5	10	2014	15	4	57	260	17.1894	34.7084		0.1028	5.83867	0.0492	0.0686	1026.39	258.383	17.1462
10	124.03	15.345	5	10	2014	15	4	57	262	17.1404	34.7049		0.1098	5.80198	0.0498	0.0699	1026.41	260.369	17.097
10	124.03	15.345	5	10	2014	15	4	57	264	17.1176	34.7033		0.1082	5.79274	0.0489	0.0696	1026.42	262.355	17.0738
10	124.03	15.345	5	10	2014	15	4	57	266	17.0135	34.6966		0.1038	5.76576	0.0488	0.0688	1026.45	264.342	16.9695
10	124.03	15.345	5	10	2014	15	4	57	268	16.9225	34.6894		0.0996	5.70814	0.0492	0.0679	1026.47	266.328	16.8784
10	124.03	15.345	5	10	2014	15	4	57	270	16.9111	34.6888		0.1083	5.71712	0.0483	0.0697	1026.48	268.314	16.8667
10	124.03	15.345	5	10	2014	15	4	57	272	16.8963	34.6876		0.1063	5.7276		0.0693	1026.5	270.3	16.8516
10	124.03	15.345	5	10	2014	15	4	57	274	16.8628	34.6853		0.1081	5.73354	0.0483	0.0696	1026.51	272.286	16.8178
10	124.03	15.345	5	10	2014	15	4	57	276	16.8218	34.6821		0.1057	5.71829	0.0492	0.0691	1026.53	274.273	16.7766
10	124.03	15.345	5	10	2014	15	4	57	278	16.783	34.6792		0.1118	5.70896	0.0487	0.0703	1026.54	276.259	16.7375
10	124.03	15.345	5	10	2014	15	4	57	280	16.7604	34.6779		0.1142	5.69072	0.048	0.0708	1026.56	278.244	16.7147
10	124.03	15.345	5	10	2014	15	4	57	282	16.7026	34.6734		0.1072	5.67152	0.0487	0.0694	1026.58	280.231	16.6566
10	124.03	15.345	5	10	2014	15	4	57	284	16.6455	34.6695		0.1057	5.64211	0.0477	0.0692	1026.59	282.217	16.5993
10	124.03	15.345	5	10	2014	15	4	57	286	16.5969	34.6662		0.1052	5.64158	0.0484	0.069	1026.61	284.203	16.5505
10	124.03	15.345	5	10	2014	15	4	57	288	16.5344	34.6612		0.106	5.63036	0.0484	0.0692	1026.63	286.189	16.4878
10	124.03	15.345	5	10	2014	15	4	57	290	16.4704	34.6572		0.1124	5.62892	0.049	0.0705	1026.65	288.175	16.4236
10	124.03	15.345	5	10	2014	15	4	57	292	16.3843	34.6509		0.108	5.50788	0.0489	0.0696	1026.68	290.161	16.3373
10	124.03	15.345	5	10	2014	15	4	57	294	16.3383	34.6484		0.1056	5.40129	0.048	0.0691	1026.69	292.147	16.2911
10	124.03	15.345	5	10	2014	15	4	57	296	16.2557	34.6416		0.115	5.30872	0.0486	0.071	1026.72	294.133	16.2083
10	124.03	15.345	5	10	2014	15	4	57	298	16.1064	34.6299		0.1124	5.28053	0.0493	0.0705	1026.75	296.119	16.059
10	124.03	15.345	5	10	2014	15	4	57	300	15.9065	34.615		0.1181	5.26057	0.0483	0.0716	1026.8	298.105	15.8592
10	124.03	15.345	5	10	2014	15	4	57	302	15.7811	34.6053		0.1126	5.24983	0.0482	0.0705	1026.83	300.091	15.7338
10	124.03	15.345	5	10	2014	15	4	57	304	15.5517	34.5875		0.1044	5.24191	0.0484	0.0689	1026.87	302.077	15.5045
10	124.03	15.345	5	10	2014	15	4	57	306	15.4742	34.5811		0.1106	5.22174	0.0477	0.0701	1026.9	304.062	15.4269
10	124.03	15.345	5	10	2014	15	4	57	308	15.4227	34.5769		0.1037	5.2245	0.0485	0.0687	1026.91	306.048	15.3751
10	124.03	15.345	5	10	2014	15	4	57	310	15.321	34.5699		0.1076	5.2234	0.0485	0.0695	1026.94	308.035	15.2733
10	124.03	15.345	5	10	2014	15	4	57	312	15.2962	34.5682		0.108	5.19934	0.0481	0.0696	1026.95	310.019	15.2483
10	124.03	15.345	5	10	2014	15	4	57	314	15.2891	34.568		0.1052	5.20351	0.0481	0.069	1026.96	312.007	15.2409
10	124.03	15.345	5	10	2014	15	4	57	316	15.2341	34.5635		0.0995	5.19318	0.0485	0.0679	1026.98	313.991	15.1857
10	124.03	15.345	5	10	2014	15	4	57	318	15.1071	34.5533		0.1045	5.19703	0.0477	0.0689	1027.01	315.978	15.0587
10	124.03	15.345	5	10	2014	15	4	57	320	14.9411	34.5394		0.1042	5.2196	0.0476	0.0689	1027.05	317.963	14.8928
10	124.03	15.345	5	10	2014	15	4	57	322	14.7489	34.5246		0.1079	5.2259		0.0696	1027.09	319.949	14.7007
10	124.03	15.345	5	10	2014	15	4	57	324	14.6158	34.515		0.1032	5.21708	0.0501	0.0686	1027.12	321.935	14.5676
10	124.03	15.345	5	10	2014	15	4	57	326	14.5696	34.5118		0.1071	5.2301	0.0476	0.0694	1027.13	323.92	14.5212
10	124.03	15.345	5	10	2014	15	4	57	328	14.4308	34.5011		0.1019	5.24062	0.0495	0.0684	1027.17	325.906	14.3824
10	124.03	15.345	5	10	2014	15	4	57	330	14.3562	34.4974		0.1054	5.25219	0.0487	0.0691	1027.19	327.892	14.3077
10	124.03	15.345	5	10	2014	15	4	57	332	14.3423	34.4971		0.1037	5.25524	0.0484	0.0688	1027.2	329.877	14.2935
10	124.03	15.345	5	10	2014	15	4	57	334	14.2554	34.4904		0.108	5.2646	0.0486	0.0696	1027.22	331.863	14.2066
10	124.03	15.345	5	10	2014	15	4	57	336	14.1439	34.4838		0.1033	5.25416	0.0485	0.0687	1027.25	333.849	14.095
10	124.03	15.345	5	10	2014	15	4	57	338	14.1018	34.4813		0.1077	5.2435	0.0485	0.0695	1027.27	335.834	14.0527
10	124.03	15.345	5	10	2014	15	4	57	340	14.0056	34.4762		0.1032	5.23822	0.0489	0.0686	1027.29	337.819	13.9564
10	124.03	15.345	5	10	2014	15	4	57	342	13.963	34.4762		0.1118	5.27172	0.048	0.0703	1027.31	339.805	13.9136
10	124.03	15.345	5	10	2014	15	4	57	344	13.8773	34.4708		0.107	5.28655	0.0491	0.0694	1027.33	341.791	13.8278
10	124.03	15.345	5	10	2014	15	4	57	346	13.7998	34.4664		0.1066	5.28574	0.0487	0.0693	1027.35	343.776	13.7503
10	124.03	15.345	5	10	2014	15	4	57	348	13.6985	34.4592		0.1025	5.30525	0.049	0.0685	1027.38	345.762	13.6489
10	124.03	15.345	5	10	2014	15	4	57	350	13.4785	34.4494		0.1099	5.28416	0.049	0.07	1027.43	347.75	13.4292
11	124.19	15.468	5	10	2014	19	14	20	4	29.6946	33.511		0.1117	5.61413	0.0506	0.0703	1020.73	3.978	29.6936
11	124.19	15.468	5	10	2014	19	14	20	6	29.7604	34.072		0.114	5.57337	0.0516	0.0708	1021.14	5.966	29.7589
11	124.19	15.468	5	10	2014	19	14	20	8	29.7629	34.0907		0.1114	5.56112	0.0507	0.0703	1021.16	7.954	29.7609
11	124.19	15.468	5	10	2014	19	14	20	10	29.7672	34.0919		0.1128	5.57968	0.0503	0.0706	1021.17	9.945	29.7648
11	124.19	15.468	5	10	2014	19	14	20	12	29.7734	34.094		0.1114	5.58496	0.0508	0.0703	1021.18	11.931	29.7705
11	124.19	15.468	5	10	2014	19	14	20	14	29.7718	34.0927		0.1092	5.57855	0.0513	0.0698	1021.18	13.921	29.7683
11	124.19	15.468	5	10	2014	19	14	20	16	29.7776	34.105		0.108	5.58835	0.0512	0.0696	1021.2	15.91	29.7737
11	124.19	15.468	5	10	2014	19	14	20	18	29.7673	34.1355		0.112	5.57545	0.0512	0.0704	1021.23	17.899	29.7629
11	124.19	15.468	5	10	2014	19	14	20	20	29.7015	34.1884		0.1179	5.58443	0.0498	0.0716	1021.3	19.887	29.6966
11	124.19	15.468	5	10	2014	19	14	20	22	29.6187	34.265		0.1114	5.61004	0.0503	0.0703	1021.4	21.876	29.6133
11	124.19	15.468	5	10	2014	19	14	20	24	29.4792	34.3384		0.1178	5.6152	0.0505	0.0715	1021.51	23.864	29.4733
11	124.19	15.468	5	10	2014	19	14	20	26	29.2867	34.455		0.1118	5.67318	0.0511	0.0703	1021.67	25.854	29.2804
11	124.19	15.468	5	10	2014	19	14	20	28	28.7184	34.6865		0.1142	5.74069	0.051	0.0708	1022.04	27.841	28.7117
11	124.19	15.468	5	10	2014	19	14	20	30	28.4339	34.7052		0.1115	5.77654	0.0526	0.0703	1022.16	29.83	28.4268
11	124.19	15.468	5	10	2014	19	14	20	32	28.3765	34.7091		0.111	5.78234	0.051	0.0702	1022.19	31.818	28.3689
11	124.19	15.468	5	10	2014	19	14	20	34	28.2787	34.7197		0.1196	5.79181	0.0528	0.0719	1022.24	33.807	28.2706
11	124.19	15.468	5	10	2014	19	14	20	36	28.2369	34.7338		0.1141	5.80651	0.0534	0.0708	1022.27	35.795	28.2284
11	124.19	15.468	5	10	2014	19	14	20	38	28.2076	34.7461		0.1197	5.81688	0.0526	0.0719	1022.3	37.784	28.1987
11	124.19	15.468	5	10	2014	19	14	20	40	28.13	34.7479		0.1117	5.84014	0.0521	0.0703	1022.33	39.773	28.1205
11	124.19	15.468	5	10	2014	19	14	20	42	28.0725	34.7541		0.1119	5.84158	0.0522	0.0704	1022.37	41.76	28.0626
11	124.19	15.468	5	10	2014	19	14	20	44	28.072	34.7838		0.1209	5.85597	0.0539	0.0722	1022.4	43.749	28.0617
11	124.19	15.468	5	10	2014	19	14	20	46	28.0191	34.797		0.114	5.85278	0.0532	0.0708	1022.43	45.737	28.0082
11	124.19	15.468	5	10	2014	19	14	20	48	27.9499	34.8012		0.1143	5.86398	0.0525	0.0708	1022.47	47.726	27.9387
11	124.19	15.468	5	10	2014	19	14	20	50	27.9024	34.8192		0.1195	5.86832	0.0533	0.0719	1022.5	49.714	27.8907
11	124.19	15.468	5	10	2014	19	14	20	52	27.8701	34.8352		0.111	5.87313	0.0541	0.0702	1022.54	51.702	27.8579
11	124.19	15.468	5	10	2014	19	14	20	54	27.8182	34.846		0.1092	5.89053	0.054	0.0698	1022.57	53.691	27.8055
11	124.19	15.468	5	10	2014	19	14	20	56	27.7626	34.8477		0.1168	5.90353	0.0533	0.0714	1022.6	55.679	27.7495
11	124.19	15.468	5	10	2014	19	14	20	58	27.6605	34.8463		0.1181	5.92813	0.0549	0.0716	1022.64	57.667	27.6469
11	124.19	15.468	5	10	2014	19	14	20	60	27.4237	34.8141		0.1203	5.92965	0.0542	0.072	1022.7	59.655	27.4098
11	124.19	15.468	5	10	2014	19	14	20	62	27.2964	34.8128		0.1189	5.97387	0.0533	0.0718	1022.75	61.644	27.2821
11	124.19	15.468	5	10	2014	19	14	20	64	27.1306	34.7984		0.1172	5.96267	0.0532	0.0714	1022.8	63.632	27.1159
11	124.19	15.468	5	10	2014	19	14	20	66	27.0656	34.7911		0.1138	5.97946	0.0547	0.0707	1022.82	65.62	27.0504
11	124.19	15.468	5	10	2014	19	14	20	68	26.9561	34.7798		0.1163	5.97013	0.0541	0.0712	1022.86	67.608	26.9405
11	124.19	15.468	5	10	2014	19	14	20	70	26.8939	34.7824		0.1208	5.97196	0.055	0.0722	1022.89	69.597	26.8779
11	124.19	15.468	5	10	2014	19	14	20	72	26.8773	34.7904		0.1185	5.96625	0.0552	0.0717	1022.91	71.585	26.8608
11	124.19	15.468	5	10	2014	19	14	20	74	26.8503	34.7974		0.1179	5.95979	0.0551	0.0715	1022.93	73.573	26.8334
11	124.19	15.468	5	10	2014	19	14	20	76	26.8388	34.8045		0.1102	5.94227	0.054	0.07	1022.95	75.56	26.8214
11	124.19	15.468	5	10	2014	19	14	20	78	26.8381	34.843		0.1139	5.95914	0.0549	0.0708	1022.99	77.549	26.8203
11	124.19	15.468	5	10	2014	19	14	20	80	26.827	34.8659		0.109	5.97337	0.0558	0.0698	1023.02	79.538	26.8088
11	124.19	15.468	5	10	2014	19	14	20	82	26.826	34.8887		0.1139	5.9757	0.0553	0.0708	1023.04	81.524	26.8073
11	124.19	15.468	5	10	2014	19	14	20	84	26.7766	34.9044	0.0003	0.1167	5.9693	0.056	0.0713	1023.08	83.513	26.7575
11	124.19	15.468	5	10	2014	19	14	20	86	26.6968	34.9159	0.0112	0.1207	5.95748	0.0571	0.0721	1023.12	85.501	26.6772
11	124.19	15.468	5	10	2014	19	14	20	88	26.6467	34.9131	0.0123	0.1161	5.95251	0.0572	0.0712	1023.14	87.489	26.6267
11	124.19	15.468	5	10	2014	19	14	20	90	26.5948	34.9095	0.0244	0.1181	5.9516	0.0584	0.0716	1023.16	89.477	26.5744
11	124.19	15.468	5	10	2014	19	14	20	92	26.5328	34.913	0.0234	0.1137	5.94184	0.0583	0.0707	1023.2	91.465	26.512
11	124.19	15.468	5	10	2014	19	14	20	94	26.4685	34.9144	0.0164	0.1154	5.92247	0.0577	0.0711	1023.23	93.452	26.4472
11	124.19	15.468	5	10	2014	19	14	20	96	26.4211	34.912	0.0298	0.1164	5.91827	0.059	0.0713	1023.25	95.441	26.3994
11	124.19	15.468	5	10	2014	19	14	20	98	26.3717	34.9005	0.0326	0.1177	5.91937	0.0593	0.0715	1023.26	97.429	26.3496
11	124.19	15.468	5	10	2014	19	14	20	100	26.3309	34.8943	0.0335	0.1161	5.92355	0.0593	0.0712	1023.28	99.417	26.3084
11	124.19	15.468	5	10	2014	19	14	20	102	26.2941	34.8929	0.0349	0.1111	5.90503	0.0595	0.0702	1023.3	101.403	26.2712
11	124.19	15.468	5	10	2014	19	14	20	104	26.2448	34.8993	0.0291	0.1168	5.88179	0.0589	0.0713	1023.33	103.392	26.2214
11	124.19	15.468	5	10	2014	19	14	20	106	26.2131	34.9009	0.0248	0.1102	5.89521	0.0585	0.07	1023.35	105.38	26.1894
11	124.19	15.468	5	10	2014	19	14	20	108	26.1699	34.8951	0.0441	0.1236	5.88348	0.0604	0.0727	1023.37	107.367	26.1457
11	124.19	15.468	5	10	2014	19	14	20	110	26.1022	34.8883	0.0338	0.1145	5.86076	0.0593	0.0709	1023.39	109.356	26.0776
11	124.19	15.468	5	10	2014	19	14	20	112	26.0633	34.8923	0.0523	0.1236	5.89067	0.0613	0.0727	1023.41	111.343	26.0383
11	124.19	15.468	5	10	2014	19	14	20	114	26.0043	34.8941	0.0352	0.1126	5.8797	0.0595	0.0705	1023.44	113.331	25.9789
11	124.19	15.468	5	10	2014	19	14	20	116	25.9194	34.9031	0.0612	0.1239	5.82101	0.0622	0.0728	1023.48	115.318	25.8936
11	124.19	15.468	5	10	2014	19	14	20	118	25.8811	34.9053	0.0566	0.1143	5.78149	0.0617	0.0709	1023.51	117.307	25.8549
11	124.19	15.468	5	10	2014	19	14	20	120	25.7198	34.9155	0.0663	0.1198	5.72273	0.0626	0.072	1023.57	119.293	25.6933
11	124.19	15.468	5	10	2014	19	14	20	122	25.5245	34.9366	0.0718	0.124	5.61819	0.0632	0.0728	1023.66	121.282	25.4976
11	124.19	15.468	5	10	2014	19	14	20	124	25.4325	34.956	0.0924	0.1178	5.54936	0.0652	0.0716	1023.71	123.269	25.4053
11	124.19	15.468	5	10	2014	19	14	20	126	25.3252	34.9585	0.0965	0.1141	5.53135	0.0656	0.0708	1023.75	125.257	25.2976
11	124.19	15.468	5	10	2014	19	14	20	128	25.0907	34.9608	0.1315	0.1205	5.49583	0.0692	0.0721	1023.84	127.244	25.0628
11	124.19	15.468	5	10	2014	19	14	20	130	24.9226	34.963	0.1531	0.1219	5.46551	0.0713	0.0724	1023.9	129.232	24.8945
11	124.19	15.468	5	10	2014	19	14	20	132	24.8134	34.9647	0.1674	0.1144	5.44658	0.0727	0.0709	1023.94	131.219	24.7849
11	124.19	15.468	5	10	2014	19	14	20	134	24.7725	34.9701	0.1697	0.113	5.43495	0.073	0.0706	1023.97	133.207	24.7437
11	124.19	15.468	5	10	2014	19	14	20	136	24.7093	34.973	0.2164	0.1124	5.43021	0.0776	0.0705	1024	135.194	24.68
11	124.19	15.468	5	10	2014	19	14	20	138	24.503	35.0039	0.4722	0.1217	5.33133	0.1032	0.0723	1024.09	137.181	24.4735
11	124.19	15.468	5	10	2014	19	14	20	140	24.4061	35.0182	0.5093	0.1149	5.23906	0.1069	0.071	1024.14	139.17	24.3763
11	124.19	15.468	5	10	2014	19	14	20	142	24.3558	35.0142	0.4931	0.1102	5.23019	0.1053	0.07	1024.16	141.157	24.3255
11	124.19	15.468	5	10	2014	19	14	20	144	24.1012	35.0087	0.4533	0.1201	5.19138	0.1013	0.072	1024.24	143.145	24.0708
11	124.19	15.468	5	10	2014	19	14	20	146	24.0084	35.0088	0.4215	0.1198	5.1583	0.0981	0.0719	1024.28	145.131	23.9777
11	124.19	15.468	5	10	2014	19	14	20	148	23.8482	35.0075	0.373	0.1172	5.15947	0.0933	0.0715	1024.33	147.12	23.8172
11	124.19	15.468	5	10	2014	19	14	20	150	23.6717	35.014	0.3765	0.1239	5.11831	0.0937	0.0728	1024.4	149.106	23.6404
11	124.19	15.468	5	10	2014	19	14	20	152	23.5524	35.0093	0.3454	0.1151	5.107	0.0906	0.071	1024.44	151.094	23.5208
11	124.19	15.468	5	10	2014	19	14	20	154	23.2696	34.9886	0.3128	0.1243	5.13203	0.0873	0.0729	1024.51	153.081	23.2378
11	124.19	15.468	5	10	2014	19	14	20	156	23.2226	34.9864	0.2947	0.1203	5.14897	0.0855	0.072	1024.53	155.069	23.1905
11	124.19	15.468	5	10	2014	19	14	20	158	23.1717	34.988	0.3064	0.1231	5.16508	0.0866	0.0726	1024.56	157.056	23.1393
11	124.19	15.468	5	10	2014	19	14	20	160	22.895	34.987	0.2727	0.1218	5.14668	0.0833	0.0724	1024.65	159.044	22.8624
11	124.19	15.468	5	10	2014	19	14	20	162	22.4829	34.9782	0.256	0.1269	5.15316	0.0816	0.0734	1024.77	161.029	22.4504
11	124.19	15.468	5	10	2014	19	14	20	164	22.3711	34.9819	0.187	0.1182	5.13877	0.0747	0.0716	1024.81	163.018	22.3383
11	124.19	15.468	5	10	2014	19	14	20	166	22.3165	34.9806	0.2189	0.1198	5.14228	0.0779	0.0719	1024.83	165.004	22.2833
11	124.19	15.468	5	10	2014	19	14	20	168	22.2705	34.9803	0.1776	0.1241	5.13278	0.0738	0.0728	1024.85	166.992	22.237
11	124.19	15.468	5	10	2014	19	14	20	170	22.2175	34.9802	0.1769	0.1093	5.14363	0.0737	0.0699	1024.88	168.979	22.1837
11	124.19	15.468	5	10	2014	19	14	20	172	22.1192	34.9776	0.1738	0.1167	5.15453	0.0734	0.0713	1024.91	170.966	22.0851
11	124.19	15.468	5	10	2014	19	14	20	174	21.7332	34.969	0.1565	0.1141	5.14885	0.0716	0.0708	1025.02	172.954	21.6991
11	124.19	15.468	5	10	2014	19	14	20	176	21.6822	34.9697	0.1361	0.1198	5.14698	0.0696	0.072	1025.05	174.94	21.6477
11	124.19	15.468	5	10	2014	19	14	20	178	21.6621	34.9724	0.1178	0.1155	5.14061	0.0678	0.0711	1025.06	176.928	21.6273
11	124.19	15.468	5	10	2014	19	14	20	180	21.6355	34.9738	0.1332	0.1199	5.14117	0.0693	0.0719	1025.08	178.915	21.6003
11	124.19	15.468	5	10	2014	19	14	20	182	21.5475	34.9712	0.1433	0.1164	5.12622	0.0703	0.0713	1025.11	180.901	21.512
11	124.19	15.468	5	10	2014	19	14	20	184	21.4053	34.9692	0.1137	0.1216	5.1227	0.0674	0.0723	1025.16	182.889	21.3696
11	124.19	15.468	5	10	2014	19	14	20	186	21.3759	34.9691	0.1181	0.1202	5.12031	0.0678	0.072	1025.18	184.876	21.3398
11	124.19	15.468	5	10	2014	19	14	20	188	21.1929	34.965	0.0996	0.124	5.11532	0.0659	0.0728	1025.23	186.862	21.1567
11	124.19	15.468	5	10	2014	19	14	20	190	21.1162	34.9564	0.0809	0.1192	5.13845	0.0641	0.0718	1025.25	188.85	21.0797
11	124.19	15.468	5	10	2014	19	14	20	192	20.924	34.9402	0.0928	0.1199	5.18471	0.0653	0.072	1025.3	190.836	20.8873
11	124.19	15.468	5	10	2014	19	14	20	194	20.7441	34.9388	0.0563	0.1237	5.17427	0.0616	0.0728	1025.36	192.824	20.7073
11	124.19	15.468	5	10	2014	19	14	20	196	20.6249	34.9357	0.0451	0.1157	5.173	0.0605	0.0711	1025.4	194.811	20.5879
11	124.19	15.468	5	10	2014	19	14	20	198	20.5765	34.942	0.0135	0.1192	5.15016	0.0574	0.0718	1025.43	196.797	20.5392
11	124.19	15.468	5	10	2014	19	14	20	200	20.5064	34.9425	0.0041	0.1128	5.12393	0.0564	0.0705	1025.45	198.785	20.4687
11	124.19	15.468	5	10	2014	19	14	20	202	20.4355	34.9401	0.0255	0.1143	5.10757	0.0585	0.0708	1025.48	200.771	20.3976
11	124.19	15.468	5	10	2014	19	14	20	204	20.3578	34.9329		0.111	5.14459	0.0549	0.0702	1025.5	202.758	20.3196
11	124.19	15.468	5	10	2014	19	14	20	206	20.1093	34.904		0.1185	5.19665	0.0543	0.0717	1025.56	204.745	20.0711
11	124.19	15.468	5	10	2014	19	14	20	208	20.0402	34.8955		0.1174	5.30064	0.0542	0.0715	1025.58	206.732	20.0016
11	124.19	15.468	5	10	2014	19	14	20	210	20.0037	34.8908		0.1141	5.32072	0.0545	0.0708	1025.59	208.72	19.9649
11	124.19	15.468	5	10	2014	19	14	20	212	19.8364	34.8765		0.1124	5.3761	0.0541	0.0705	1025.64	210.705	19.7974
11	124.19	15.468	5	10	2014	19	14	20	214	19.4818	34.8575		0.1098	5.40922	0.0502	0.07	1025.72	212.693	19.443
11	124.19	15.468	5	10	2014	19	14	20	216	19.2396	34.8513		0.1064	5.41289	0.0509	0.0693	1025.79	214.679	19.2007
11	124.19	15.468	5	10	2014	19	14	20	218	19.1795	34.844		0.1116	5.41323	0.051	0.0703	1025.81	216.666	19.1403
11	124.19	15.468	5	10	2014	19	14	20	220	19.0487	34.8348		0.1047	5.43713	0.0485	0.069	1025.84	218.652	19.0094
11	124.19	15.468	5	10	2014	19	14	20	222	18.9348	34.8263		0.1021	5.45888	0.0489	0.0684	1025.88	220.64	18.8953
11	124.19	15.468	5	10	2014	19	14	20	224	18.8828	34.8228		0.102	5.49026	0.0496	0.0684	1025.9	222.625	18.8431
11	124.19	15.468	5	10	2014	19	14	20	226	18.7911	34.8145		0.113	5.49637	0.0501	0.0706	1025.92	224.613	18.7512
11	124.19	15.468	5	10	2014	19	14	20	228	18.7113	34.8086		0.1069	5.52985	0.0496	0.0694	1025.95	226.6	18.6711
11	124.19	15.468	5	10	2014	19	14	20	230	18.5837	34.7973		0.1081	5.57272	0.0504	0.0696	1025.98	228.585	18.5433
11	124.19	15.468	5	10	2014	19	14	20	232	18.4976	34.7908		0.1055	5.60785	0.0493	0.0691	1026	230.573	18.4571
11	124.19	15.468	5	10	2014	19	14	20	234	18.4217	34.7852		0.1029	5.62993	0.0493	0.0686	1026.03	232.558	18.3808
11	124.19	15.468	5	10	2014	19	14	20	236	18.3514	34.7789		0.109	5.65737	0.0486	0.0698	1026.05	234.546	18.3103
11	124.19	15.468	5	10	2014	19	14	20	238	18.2466	34.7764		0.1132	5.66241	0.0485	0.0706	1026.08	236.531	18.2053
11	124.19	15.468	5	10	2014	19	14	20	240	18.146	34.7718		0.1066	5.67621	0.0482	0.0693	1026.11	238.519	18.1045
11	124.19	15.468	5	10	2014	19	14	20	242	18.0948	34.7683		0.0979	5.69698	0.0482	0.0676	1026.13	240.504	18.0531
11	124.19	15.468	5	10	2014	19	14	20	244	17.9593	34.7602		0.1045	5.70578	0.0484	0.0689	1026.17	242.492	17.9175
11	124.19	15.468	5	10	2014	19	14	20	246	17.8953	34.7565		0.1058	5.73904	0.0477	0.0692	1026.19	244.477	17.8532
11	124.19	15.468	5	10	2014	19	14	20	248	17.7887	34.7486		0.102	5.7418	0.0483	0.0684	1026.22	246.464	17.7465
11	124.19	15.468	5	10	2014	19	14	20	250	17.7211	34.7442		0.1051	5.76623	0.0487	0.0691	1026.24	248.45	17.6786
11	124.19	15.468	5	10	2014	19	14	20	252	17.6584	34.7412		0.1041	5.77521	0.0492	0.0688	1026.26	250.438	17.6157
11	124.19	15.468	5	10	2014	19	14	20	254	17.6043	34.7365		0.1043	5.80103	0.0493	0.0689	1026.28	252.423	17.5614
11	124.19	15.468	5	10	2014	19	14	20	256	17.5629	34.7339		0.1012	5.80196		0.0683	1026.3	254.41	17.5197
11	124.19	15.468	5	10	2014	19	14	20	258	17.4873	34.7282		0.1043	5.81065	0.0496	0.0689	1026.32	256.396	17.4439
11	124.19	15.468	5	10	2014	19	14	20	260	17.4234	34.7249		0.1018	5.83718	0.0485	0.0684	1026.34	258.383	17.3798
11	124.19	15.468	5	10	2014	19	14	20	262	17.3605	34.7198		0.1075	5.8488	0.0488	0.0695	1026.36	260.369	17.3166
11	124.19	15.468	5	10	2014	19	14	20	264	17.2558	34.7123		0.1064	5.81615	0.048	0.0693	1026.39	262.355	17.2117
11	124.19	15.468	5	10	2014	19	14	20	266	17.2195	34.7106		0.0979	5.8016	0.0487	0.0676	1026.41	264.342	17.1752
11	124.19	15.468	5	10	2014	19	14	20	268	17.1927	34.7087		0.0946	5.77982	0.0496	0.0669	1026.42	266.328	17.1481
11	124.19	15.468	5	10	2014	19	14	20	270	17.1216	34.7039		0.1079	5.75905	0.0485	0.0696	1026.44	268.314	17.0769
11	124.19	15.468	5	10	2014	19	14	20	272	17.108	34.703		0.1091	5.75053	0.0482	0.0698	1026.46	270.301	17.063
11	124.19	15.468	5	10	2014	19	14	20	274	17.1054	34.703		0.0983	5.74961	0.0491	0.0677	1026.47	272.286	17.06
11	124.19	15.468	5	10	2014	19	14	20	276	17.1022	34.7028		0.1056	5.75502	0.0484	0.0691	1026.48	274.272	17.0565
11	124.19	15.468	5	10	2014	19	14	20	278	17.0371	34.6978		0.1037	5.75019	0.0495	0.0687	1026.5	276.259	16.9911
11	124.19	15.468	5	10	2014	19	14	20	280	16.9442	34.6916		0.1064	5.70182	0.0488	0.0693	1026.52	278.245	16.8981
11	124.19	15.468	5	10	2014	19	14	20	282	16.9133	34.6894		0.108	5.70993	0.0487	0.0696	1026.54	280.231	16.8669
11	124.19	15.468	5	10	2014	19	14	20	284	16.8611	34.6855		0.1039	5.69959	0.0493	0.0688	1026.56	282.217	16.8145
11	124.19	15.468	5	10	2014	19	14	20	286	16.7572	34.6782		0.1026	5.65297	0.0486	0.0685	1026.58	284.203	16.7105
11	124.19	15.468	5	10	2014	19	14	20	288	16.6571	34.6706		0.1059	5.55584	0.0485	0.0692	1026.61	286.189	16.6102
11	124.19	15.468	5	10	2014	19	14	20	290	16.589	34.6656		0.1046	5.50619	0.0494	0.0689	1026.63	288.175	16.5419
11	124.19	15.468	5	10	2014	19	14	20	292	16.5019	34.6596		0.1082	5.42157	0.0489	0.0696	1026.66	290.161	16.4547
11	124.19	15.468	5	10	2014	19	14	20	294	16.4164	34.6535		0.1024	5.33879	0.0492	0.0685	1026.68	292.147	16.369
11	124.19	15.468	5	10	2014	19	14	20	296	16.292	34.6447		0.1038	5.2744	0.0486	0.0688	1026.71	294.132	16.2446
11	124.19	15.468	5	10	2014	19	14	20	298	16.1599	34.6342		0.1023	5.25717	0.0492	0.0685	1026.74	296.119	16.1124
11	124.19	15.468	5	10	2014	19	14	20	300	16.0482	34.6251		0.1016	5.25077	0.0482	0.0683	1026.77	298.105	16.0006
11	124.19	15.468	5	10	2014	19	14	20	302	15.9511	34.618		0.1065	5.23182	0.0489	0.0693	1026.8	300.091	15.9034
11	124.19	15.468	5	10	2014	19	14	20	304	15.8226	34.6079		0.104	5.22188		0.0688	1026.83	302.076	15.7748
11	124.19	15.468	5	10	2014	19	14	20	306	15.7545	34.6036		0.1024	5.22684	0.0487	0.0685	1026.85	304.063	15.7066
11	124.19	15.468	5	10	2014	19	14	20	308	15.6971	34.5999		0.1018	5.22658	0.0496	0.0684	1026.87	306.049	15.649
11	124.19	15.468	5	10	2014	19	14	20	310	15.5993	34.5907		0.1006	5.23618	0.0495	0.0681	1026.89	308.033	15.551
11	124.19	15.468	5	10	2014	19	14	20	312	15.4424	34.5805		0.1013	5.15799	0.0492	0.0683	1026.93	310.021	15.3942
11	124.19	15.468	5	10	2014	19	14	20	314	15.2622	34.5652		0.1057	5.10112	0.049	0.0691	1026.97	312.006	15.2141
11	124.19	15.468	5	10	2014	19	14	20	316	15.1216	34.5545		0.1098	5.06453	0.049	0.07	1027	313.992	15.0735
11	124.19	15.468	5	10	2014	19	14	20	318	14.9944	34.5453		0.1062	5.06762	0.0487	0.0693	1027.03	315.978	14.9463
11	124.19	15.468	5	10	2014	19	14	20	320	14.9371	34.5419		0.1054	5.09831	0.049	0.0691	1027.05	317.963	14.8888
11	124.19	15.468	5	10	2014	19	14	20	322	14.7925	34.5299		0.1083	5.14382	0.0491	0.0697	1027.08	319.949	14.7442
11	124.19	15.468	5	10	2014	19	14	20	324	14.7495	34.5274		-0.0783	5.15951	0.0486	0.0692	1027.1	321.935	14.701
11	124.19	15.468	5	10	2014	19	14	20	326	14.6947	34.5238		0.1152	5.16471	0.0493	0.0702	1027.12	323.92	14.646
11	124.19	15.468	5	10	2014	19	14	20	328	14.6039	34.517		0.1049	5.15201	0.0497	0.069	1027.14	325.906	14.5551
11	124.19	15.468	5	10	2014	19	14	20	330	14.4242	34.5037		0.1041	5.12652	0.0492	0.0688	1027.18	327.893	14.3756
11	124.19	15.468	5	10	2014	19	14	20	332	14.2942	34.4942		0.1044	5.08507	0.0499	0.0689	1027.21	329.876	14.2456
11	124.19	15.468	5	10	2014	19	14	20	334	14.1262	34.4847		0.0996	5.06145	0.0486	0.0679	1027.25	331.863	14.0777
11	124.19	15.468	5	10	2014	19	14	20	336	13.9095	34.4682		0.1027	4.97842	0.0502	0.0686	1027.29	333.848	13.8611
11	124.19	15.468	5	10	2014	19	14	20	338	13.8367	34.4631		0.1036	4.98117	0.0484	0.0687	1027.31	335.834	13.7882
11	124.19	15.468	5	10	2014	19	14	20	340	13.699	34.4566		0.1043	4.95299	0.0482	0.0689	1027.34	337.819	13.6505
11	124.19	15.468	5	10	2014	19	14	20	342	13.6515	34.4548		0.1002	4.91355	0.0476	0.0681	1027.36	339.806	13.6029
11	124.19	15.468	5	10	2014	19	14	20	344	13.6021	34.451		0.1091	4.91196	0.0488	0.0698	1027.38	341.791	13.5534
11	124.19	15.468	5	10	2014	19	14	20	346	13.5088	34.4454	0.0637	0.0987	4.90132	0.0498	0.0678	1027.4	343.776	13.46
12	124.37	15.578	5	10	2014	23	10	16	4	29.799	34.3214		0.0609	5.86785	0.0521	0.0708	1021.3	3.977	29.798
12	124.37	15.578	5	10	2014	23	10	16	6	29.7958	34.4157		0.1174	5.50162	0.0517	0.0714	1021.38	5.966	29.7943
12	124.37	15.578	5	10	2014	23	10	16	8	29.7935	34.4156		0.1172	5.53475	0.0516	0.0714	1021.39	7.954	29.7915
12	124.37	15.578	5	10	2014	23	10	16	10	29.7807	34.4217		0.1171	5.55485	0.051	0.0714	1021.41	9.944	29.7783
12	124.37	15.578	5	10	2014	23	10	16	12	29.676	34.4551		0.1162	5.59358	0.0504	0.0712	1021.48	11.932	29.6731
12	124.37	15.578	5	10	2014	23	10	16	14	29.5237	34.4654		0.1121	5.60767	0.0509	0.0704	1021.55	13.921	29.5203
12	124.37	15.578	5	10	2014	23	10	16	16	29.4798	34.449		0.1135	5.61499	0.05	0.0707	1021.56	15.91	29.4759
12	124.37	15.578	5	10	2014	23	10	16	18	29.455	34.441		0.1114	5.60028	0.0499	0.0703	1021.57	17.899	29.4506
12	124.37	15.578	5	10	2014	23	10	16	20	29.4314	34.4326		0.1161	5.5983	0.0506	0.0712	1021.58	19.887	29.4265
12	124.37	15.578	5	10	2014	23	10	16	22	29.4257	34.4332		0.1136	5.60805	0.0504	0.0707	1021.59	21.876	29.4203
12	124.37	15.578	5	10	2014	23	10	16	24	29.2926	34.4396		0.1162	5.63297	0.051	0.0712	1021.65	23.864	29.2867
12	124.37	15.578	5	10	2014	23	10	16	26	29.0946	34.4685		0.1142	5.67651	0.0504	0.0708	1021.74	25.853	29.0883
12	124.37	15.578	5	10	2014	23	10	16	28	28.8538	34.5272		0.1142	5.69923	0.0513	0.0708	1021.88	27.841	28.8471
12	124.37	15.578	5	10	2014	23	10	16	30	28.7167	34.6112		0.113	5.72982	0.0515	0.0706	1021.99	29.83	28.7095
12	124.37	15.578	5	10	2014	23	10	16	32	28.5406	34.6955		0.1156	5.75988	0.0507	0.0711	1022.13	31.818	28.5329
12	124.37	15.578	5	10	2014	23	10	16	34	28.2991	34.6776		0.1174	5.787	0.0507	0.0715	1022.2	33.807	28.291
12	124.37	15.578	5	10	2014	23	10	16	36	28.1573	34.7405		0.1146	5.81068	0.0513	0.0709	1022.3	35.795	28.1488
12	124.37	15.578	5	10	2014	23	10	16	38	28.0129	34.8163		0.1231	5.83713	0.0526	0.0726	1022.42	37.784	28.0039
12	124.37	15.578	5	10	2014	23	10	16	40	28.0204	34.853		0.1154	5.83919	0.0528	0.0711	1022.45	39.772	28.0109
12	124.37	15.578	5	10	2014	23	10	16	42	27.9272	34.8482		0.1214	5.84725	0.0531	0.0723	1022.48	41.761	27.9173
12	124.37	15.578	5	10	2014	23	10	16	44	27.8632	34.8586		0.1224	5.85853	0.0529	0.0725	1022.52	43.751	27.8529
12	124.37	15.578	5	10	2014	23	10	16	46	27.8399	34.8671		0.114	5.84445	0.053	0.0708	1022.54	45.737	27.8291
12	124.37	15.578	5	10	2014	23	10	16	48	27.818	34.8717		0.1228	5.83334	0.0527	0.0726	1022.56	47.726	27.8067
12	124.37	15.578	5	10	2014	23	10	16	50	27.7671	34.8693		0.1121	5.86373	0.0521	0.0704	1022.59	49.714	27.7554
12	124.37	15.578	5	10	2014	23	10	16	52	27.6573	34.8584		0.1151	5.89386	0.0519	0.071	1022.62	51.703	27.6452
12	124.37	15.578	5	10	2014	23	10	16	54	27.4931	34.8358		0.1235	5.92148	0.0527	0.0727	1022.67	53.691	27.4806
12	124.37	15.578	5	10	2014	23	10	16	56	27.4203	34.8524		0.1243	5.93766	0.052	0.0729	1022.71	55.679	27.4073
12	124.37	15.578	5	10	2014	23	10	16	58	27.3548	34.861		0.1134	5.96325	0.0523	0.0707	1022.75	57.667	27.3413
12	124.37	15.578	5	10	2014	23	10	16	60	27.2875	34.8623		0.1203	5.99247	0.0532	0.0721	1022.78	59.656	27.2736
12	124.37	15.578	5	10	2014	23	10	16	62	27.1469	34.8646		0.1159	5.97437	0.0532	0.0711	1022.83	61.644	27.1326
12	124.37	15.578	5	10	2014	23	10	16	64	27.0957	34.8663		0.121	5.98766	0.0527	0.0722	1022.86	63.632	27.0809
12	124.37	15.578	5	10	2014	23	10	16	66	27.0723	34.8636		0.1226	5.98771	0.0534	0.0725	1022.88	65.62	27.0571
12	124.37	15.578	5	10	2014	23	10	16	68	27.0541	34.8616		0.1176	6.00329	0.0535	0.0715	1022.89	67.608	27.0385
12	124.37	15.578	5	10	2014	23	10	16	70	27.0385	34.8659		0.1194	5.98908	0.0533	0.0718	1022.9	69.597	27.0224
12	124.37	15.578	5	10	2014	23	10	16	72	27.0293	34.8718		0.1182	5.98924	0.0534	0.0716	1022.92	71.584	27.0128
12	124.37	15.578	5	10	2014	23	10	16	74	27.0271	34.88		0.1201	5.99221	0.0534	0.072	1022.94	73.573	27.0101
12	124.37	15.578	5	10	2014	23	10	16	76	26.9902	34.8858		0.1148	5.98601	0.054	0.0709	1022.96	75.561	26.9728
12	124.37	15.578	5	10	2014	23	10	16	78	26.9712	34.8888		0.1205	5.9918	0.0537	0.0721	1022.98	77.549	26.9533
12	124.37	15.578	5	10	2014	23	10	16	80	26.9493	34.8898		0.1187	5.98368	0.0529	0.0717	1022.99	79.537	26.931
12	124.37	15.578	5	10	2014	23	10	16	82	26.9367	34.8916		0.1218	5.96923	0.054	0.0724	1023.01	81.524	26.9179
12	124.37	15.578	5	10	2014	23	10	16	84	26.908	34.89		0.1189	5.97963	0.0538	0.0718	1023.02	83.513	26.8888
12	124.37	15.578	5	10	2014	23	10	16	86	26.8662	34.886		0.1152	5.9771	0.0543	0.071	1023.04	85.501	26.8465
12	124.37	15.578	5	10	2014	23	10	16	88	26.8108	34.8825		0.1161	5.9653	0.054	0.0712	1023.07	87.489	26.7907
12	124.37	15.578	5	10	2014	23	10	16	90	26.7595	34.8792		0.1124	5.95656	0.0539	0.0705	1023.09	89.477	26.739
12	124.37	15.578	5	10	2014	23	10	16	92	26.7244	34.8839		0.117	5.9637	0.054	0.0714	1023.11	91.465	26.7034
12	124.37	15.578	5	10	2014	23	10	16	94	26.6633	34.883	0.0018	0.1243	5.97327	0.0562	0.0729	1023.14	93.453	26.6419
12	124.37	15.578	5	10	2014	23	10	16	96	26.6076	34.8901	0.0076	0.1196	5.95515	0.0568	0.0719	1023.17	95.441	26.5858
12	124.37	15.578	5	10	2014	23	10	16	98	26.5894	34.8916	0.0003	0.1166	5.9528	0.056	0.0713	1023.19	97.428	26.5672
12	124.37	15.578	5	10	2014	23	10	16	100	26.5669	34.8921	0.0007	0.114	5.95024	0.0561	0.0708	1023.2	99.417	26.5442
12	124.37	15.578	5	10	2014	23	10	16	102	26.5331	34.8923	0.0083	0.1183	5.94814	0.0569	0.0717	1023.22	101.403	26.51
12	124.37	15.578	5	10	2014	23	10	16	104	26.4579	34.8934	0.0063	0.1183	5.93298	0.0567	0.0716	1023.26	103.393	26.4344
12	124.37	15.578	5	10	2014	23	10	16	106	26.4154	34.892	0.0177		5.91853	0.0578		1023.28	105.38	26.3915
12	124.37	15.578	5	10	2014	23	10	16	108	26.3563	34.8911	0.0195	0.1174	5.89599	0.0579	0.0714	1023.3	107.368	26.3319
12	124.37	15.578	5	10	2014	23	10	16	110	26.2823	34.8902	0.0229	0.1194	5.86369	0.0583	0.0719	1023.33	109.355	26.2575
12	124.37	15.578	5	10	2014	23	10	16	112	26.2529	34.8902	0.0239	0.1206	5.86134	0.0584	0.0721	1023.35	111.344	26.2278
12	124.37	15.578	5	10	2014	23	10	16	114	26.2253	34.89	0.0366	0.124	5.84726	0.0597	0.0728	1023.37	113.331	26.1997
12	124.37	15.578	5	10	2014	23	10	16	116	26.2081	34.8893	0.0376	0.1258	5.85137	0.0597	0.0732	1023.38	115.318	26.1821
12	124.37	15.578	5	10	2014	23	10	16	118	26.1843	34.8877	0.0375	0.1182	5.85219	0.0597	0.0716	1023.4	117.307	26.1579
12	124.37	15.578	5	10	2014	23	10	16	120	26.0917	34.8875	0.0515	0.1217	5.79577	0.0612	0.0723	1023.44	119.293	26.0648
12	124.37	15.578	5	10	2014	23	10	16	122	25.9826	34.8921	0.0515	0.122	5.75345	0.0612	0.0724	1023.48	121.282	25.9553
12	124.37	15.578	5	10	2014	23	10	16	124	25.8403	34.8998	0.0551	0.1215	5.7127	0.0616	0.0723	1023.54	123.269	25.8127
12	124.37	15.578	5	10	2014	23	10	16	126	25.7242	34.9045	0.0603	0.1202	5.67755	0.0621	0.072	1023.59	125.257	25.6963
12	124.37	15.578	5	10	2014	23	10	16	128	25.6433	34.91	0.0766	0.1302	5.66463	0.0636	0.0741	1023.63	127.244	25.615
12	124.37	15.578	5	10	2014	23	10	16	130	25.4317	34.9181	0.0813	0.1294	5.63059	0.0641	0.0739	1023.71	129.232	25.4031
12	124.37	15.578	5	10	2014	23	10	16	132	25.3123	34.923	0.098	0.1267	5.59303	0.0658	0.0734	1023.76	131.219	25.2834
12	124.37	15.578	5	10	2014	23	10	16	134	25.2159	34.9293	0.1219	0.1226	5.58338	0.0682	0.0725	1023.8	133.207	25.1866
12	124.37	15.578	5	10	2014	23	10	16	136	25.0766	34.9409	0.1399	0.1191	5.55982	0.07	0.0718	1023.86	135.195	25.0471
12	124.37	15.578	5	10	2014	23	10	16	138	24.7221	34.9525	0.1803	0.1209	5.47684	0.074	0.0722	1023.98	137.182	24.6924
12	124.37	15.578	5	10	2014	23	10	16	140	24.5795	34.9672	0.2307	0.1185	5.41243	0.0791	0.0717	1024.05	139.169	24.5495
12	124.37	15.578	5	10	2014	23	10	16	142	24.5305	34.9766	0.2507	0.1171	5.39593	0.0811	0.0714	1024.08	141.157	24.5001
12	124.37	15.578	5	10	2014	23	10	16	144	24.3362	34.9878	0.355	0.1247	5.35352	0.0915	0.073	1024.15	143.144	24.3056
12	124.37	15.578	5	10	2014	23	10	16	146	24.1877	34.988	0.4373	0.1281	5.31286	0.0997	0.0736	1024.21	145.132	24.1567
12	124.37	15.578	5	10	2014	23	10	16	148	24.0487	34.9904	0.523	0.1249	5.28985	0.1083	0.073	1024.26	147.119	24.0175
12	124.37	15.578	5	10	2014	23	10	16	150	23.8483	35.0003	0.4732	0.1241	5.26843	0.1033	0.0728	1024.33	149.107	23.8169
12	124.37	15.578	5	10	2014	23	10	16	152	23.733	35.0064	0.4027	0.1243	5.21292	0.0963	0.0729	1024.38	151.094	23.7013
12	124.37	15.578	5	10	2014	23	10	16	154	23.5903	35.0084	0.384	0.1243	5.18709	0.0944	0.0729	1024.43	153.081	23.5583
12	124.37	15.578	5	10	2014	23	10	16	156	23.4612	35.0056	0.3492	0.1284	5.16757	0.091	0.0737	1024.48	155.068	23.4289
12	124.37	15.578	5	10	2014	23	10	16	158	23.3195	35.0022	0.3357	0.1283	5.14787	0.0896	0.0737	1024.53	157.056	23.2869
12	124.37	15.578	5	10	2014	23	10	16	160	23.0955	34.9907	0.3063	0.1241	5.15223	0.0866	0.0728	1024.59	159.043	23.0628
12	124.37	15.578	5	10	2014	23	10	16	162	22.7993	34.9907	0.3002	0.1303	5.15587	0.086	0.0741	1024.69	161.03	22.7665
12	124.37	15.578	5	10	2014	23	10	16	164	22.6565	34.9855	0.2415	0.1298	5.13546	0.0802	0.074	1024.73	163.018	22.6234
12	124.37	15.578	5	10	2014	23	10	16	166	22.5278	34.9828	0.2193	0.1188	5.15839	0.0779	0.0717	1024.77	165.005	22.4944
12	124.37	15.578	5	10	2014	23	10	16	168	22.31	34.9878	0.1929	0.128	5.14208	0.0753	0.0736	1024.85	166.993	22.2764
12	124.37	15.578	5	10	2014	23	10	16	170	22.048	34.9843	0.1759	0.1212	5.13402	0.0736	0.0723	1024.93	168.978	22.0143
12	124.37	15.578	5	10	2014	23	10	16	172	21.9387	34.9799	0.165	0.1221	5.13158	0.0725	0.0724	1024.97	170.967	21.9047
12	124.37	15.578	5	10	2014	23	10	16	174	21.8155	34.9758	0.1592	0.1166	5.12578	0.0719	0.0713	1025.01	172.954	21.7813
12	124.37	15.578	5	10	2014	23	10	16	176	21.7505	34.9731	0.1563	0.116	5.13339	0.0716	0.0712	1025.03	174.94	21.7159
12	124.37	15.578	5	10	2014	23	10	16	178	21.6957	34.9702	0.1596	0.1217	5.14027	0.0719	0.0723	1025.05	176.928	21.6608
12	124.37	15.578	5	10	2014	23	10	16	180	21.5843	34.9615	0.1479	0.1174	5.16683	0.0708	0.0715	1025.09	178.915	21.5492
12	124.37	15.578	5	10	2014	23	10	16	182	21.4603	34.9524	0.1541	0.1223	5.18629	0.0716	0.0724	1025.12	180.902	21.4249
12	124.37	15.578	5	10	2014	23	10	16	184	21.3713	34.9469	0.1352	0.1218	5.20712	0.0695	0.0724	1025.15	182.889	21.3356
12	124.37	15.578	5	10	2014	23	10	16	186	21.2238	34.9413	0.116	-0.0493	5.20933	0.0676	0.0732	1025.2	184.877	21.188
12	124.37	15.578	5	10	2014	23	10	16	188	21.1071	34.9351	0.1161	0.1153	5.23132	0.0676	0.0712	1025.23	186.863	21.071
12	124.37	15.578	5	10	2014	23	10	16	190	21.0327	34.9305	0.1027	0.1221	5.23718	0.0663	0.0724	1025.26	188.85	20.9963
[truncated: 4,141 more rows]

## Sheet: Table S3. Chemical parameters
Cruise ID	Year	Month	Day	Time	Latitude (N)	Longitude (E)	Station ID	Depth [m]	PO4 [uM]	SiO3 [uM]	NO3 + NO2 [uM]	DO [mg/L]	Total Alkalinity	DIC	pH
Benham_2014_05	2014	5	8	1899-12-31 00:40:00	15.944	124.014	1	10	0.04	2.0266	0.1677	5.7105	2280.85	1955.19	8.108
Benham_2014_05	2014	5	8	1899-12-31 00:40:00	15.944	124.014	1	20	0.0717	3.1735	0.4363	5.8522	2285.65	1955.06	8.105
Benham_2014_05	2014	5	8	1899-12-31 00:40:00	15.944	124.014	1	60	0.0744	4.0789	0.4778	5.7838	2290.41	1960.75	8.098
Benham_2014_05	2014	5	8	1899-12-31 00:40:00	15.944	124.014	1	100	0.0528	2.8717	0.4885	5.9108	2288.4	1962.16	8.106
Benham_2014_05	2014	5	8	1899-12-31 00:40:00	15.944	124.014	1	140	0.0593		0.2265	5.8082	2288.65	1964.76	8.091
Benham_2014_05	2014	5	8	1899-12-31 00:40:00	15.944	124.014	1	160	0.0527	4.5618		5.774	2290.24	1968.38	8.094
Benham_2014_05	2014	5	8	1899-12-31 00:40:00	15.944	124.014	1	180	0.0748	3.8375	0.1681	5.7496	2290	1975.73	8.086
Benham_2014_05	2014	5	8	1899-12-31 00:40:00	15.944	124.014	1	200	0.0387	3.5357	0.09	5.4517	2299.03	1997.1	8.06
Benham_2014_05	2014	5	8	1899-12-31 00:40:00	15.944	124.014	1	250	0.1893	4.1393	1.8587	5.0951	2303.41	2051.31	7.982
Benham_2014_05	2014	5	8	1899-12-31 00:40:00	15.944	124.014	1	300	0.222	5.2862	1.2819	5.3882	2290.71	2045.6	7.972
Benham_2014_05	2014	5	8	1899-12-31 04:30:00	15.874	124.209	2	10	0.0855		0.2526	5.6373	2272.13	1951.76	8.058
Benham_2014_05	2014	5	8	1899-12-31 04:30:00	15.874	124.209	2	20	0.0697	1.6644	0.2768	5.6324	2270.26	1952.47	8.044
Benham_2014_05	2014	5	8	1899-12-31 04:30:00	15.874	124.209	2	60	0.0631	5.588	0.2551	5.8473	2287.63	1967.19	8.05
Benham_2014_05	2014	5	8	1899-12-31 04:30:00	15.874	124.209	2	100	0.0884	3.2942	0.4544	5.8082	2289.36	1963.1	8.047
Benham_2014_05	2014	5	8	1899-12-31 04:30:00	15.874	124.209	2	140	0.0883	2.0266	0.8268	5.8131	2288.87	1967.34	8.041
Benham_2014_05	2014	5	8	1899-12-31 04:30:00	15.874	124.209	2	160	0.1197	3.2339	0.1798	5.8717	2289.68	1971.1	8.045
Benham_2014_05	2014	5	8	1899-12-31 04:30:00	15.874	124.209	2	180	0.0767	2.9924	0.3948	5.7105	2292.72	1988.42	8.025
Benham_2014_05	2014	5	8	1899-12-31 04:30:00	15.874	124.209	2	200	0.1591	5.2862	0.9901	5.3735	2292.41	2006.76	7.99
Benham_2014_05	2014	5	8	1899-12-31 04:30:00	15.874	124.209	2	250	0.2137	3.3546	1.9548	5.2612	2295.2	2043.28	7.946
Benham_2014_05	2014	5	8	1899-12-31 04:30:00	15.874	124.209	2	300	0.1897	4.8033	1.5233	5.5787	2283.99	2044.48	7.916
Benham_2014_05	2014	5	9	1899-12-31 00:50:00	15.654	123.808	3	10	0.0654	4.1997	0.7286	5.7399	2295.41	1958.07	8.111
Benham_2014_05	2014	5	9	1899-12-31 00:50:00	15.654	123.808	3	20	0.07	4.1997	0.3495	5.9157	2290.51	1968.05	8.112
Benham_2014_05	2014	5	9	1899-12-31 00:50:00	15.654	123.808	3	60	0.0343	2.0266	0.4203	6.0085	2287.92	1960.81	8.122
Benham_2014_05	2014	5	9	1899-12-31 00:50:00	15.654	123.808	3	100	0.0276	3.1735		6.0476	2289.47	1963.77	8.12
Benham_2014_05	2014	5	9	1899-12-31 00:50:00	15.654	123.808	3	140	0.0464			5.6226	2292.96	1993.12	8.084
Benham_2014_05	2014	5	9	1899-12-31 00:50:00	15.654	123.808	3	160	0.0456	0.1554	0.0117	5.3735	2300.62	2010.98	8.054
Benham_2014_05	2014	5	9	1899-12-31 00:50:00	15.654	123.808	3	180	0.1322	4.4411	0.8047	5.139	2298.42	2029.52	8.025
Benham_2014_05	2014	5	9	1899-12-31 00:50:00	15.654	123.808	3	200	0.1604	3.1735	1.1591	5.0511	2299.5	2037.82	7.997
Benham_2014_05	2014	5	9	1899-12-31 00:50:00	15.654	123.808	3	250	0.1897	3.6564	1.1703	5.2367	2294.56	2042.64	7.987
Benham_2014_05	2014	5	9	1899-12-31 00:50:00	15.654	123.808	3	300	0.2538	3.8375	1.8736	5.481	2287.01	2046.09	7.969
Benham_2014_05	2014	5	9	1899-12-31 03:30:00	15.777	123.96	4	10	0.0762	3.7771	0.1811	5.774	2276.24	1952.25	8.077
Benham_2014_05	2014	5	9	1899-12-31 03:30:00	15.777	123.96	4	20	0.0582	4.4411	0.1195	5.8131	2283.04	1962.28	8.065
Benham_2014_05	2014	5	9	1899-12-31 03:30:00	15.777	123.96	4	60	0.0229			6.0085	2291.26	1963.74	8.084
Benham_2014_05	2014	5	9	1899-12-31 03:30:00	15.777	123.96	4	100	0.0131	2.751	0.1569	6.0329	2287.99	1963.88	8.072
Benham_2014_05	2014	5	9	1899-12-31 03:30:00	15.777	123.96	4	140	0.0348	2.6906	0.2864	5.5787	2291.62	1991.34	8.035
Benham_2014_05	2014	5	9	1899-12-31 03:30:00	15.777	123.96	4	165	0.1333	4.8636		5.3784	2297.95	2024.95	7.99
Benham_2014_05	2014	5	9	1899-12-31 03:30:00	15.777	123.96	4	180	0.131	3.8375	0.5219	5.2514	2294.98	2027.59	7.978
Benham_2014_05	2014	5	9	1899-12-31 03:30:00	15.777	123.96	4	200	0.1638	3.5357	0.7679	5.183	2295	2037.4	7.965
Benham_2014_05	2014	5	9	1899-12-31 03:30:00	15.777	123.96	4	250	0.1802		1.1529	5.2709	2295.28	2051.88	7.926
Benham_2014_05	2014	5	9	1899-12-31 03:30:00	15.777	123.96	4	300	0.2026	2.751	0.8322	5.4223	2288.22	2060.37	7.886
Benham_2014_05	2014	5	9	1899-12-31 07:16:00	15.907	124.182	5	10	0.0552	2.0266	0.0503	5.7692	2264.06	1931.83	8.152
Benham_2014_05	2014	5	9	1899-12-31 07:16:00	15.907	124.182	5	20	0.1382	6.7349	0.048	5.8766	2277.4	1953.73	8.136
Benham_2014_05	2014	5	9	1899-12-31 07:16:00	15.907	124.182	5	60	0.0878	2.8717	1.136	5.9939	2291.77	1967.5	8.141
Benham_2014_05	2014	5	9	1899-12-31 07:16:00	15.907	124.182	5	100	0.0332	4.6826	0.4031	6.0622	2288.47	1963.07	8.138
Benham_2014_05	2014	5	9	1899-12-31 07:16:00	15.907	124.182	5	140	0.0357	3.2339	0.2475	5.901	2289.53	1973.72	8.118
Benham_2014_05	2014	5	9	1899-12-31 07:16:00	15.907	124.182	5	160	0.0394	0.1554		5.9597	2290.05	1971.21	8.112
Benham_2014_05	2014	5	9	1899-12-31 07:16:00	15.907	124.182	5	180	0.0676	3.2942	0.4605	5.437	2293.09	2004.57	8.076
Benham_2014_05	2014	5	9	1899-12-31 07:16:00	15.907	124.182	5	200	0.1266	3.1735	0.7329	5.2416	2298.31	2022.59	8.027
Benham_2014_05	2014	5	9	1899-12-31 07:16:00	15.907	124.182	5	250	0.2018	6.3727	2.3873	5.2709	2292.49	2048.51	7.988
Benham_2014_05	2014	5	9	1899-12-31 07:16:00	15.907	124.182	5	300	0.2568		2.6204	5.52	2291.87	2057.63	7.962
Benham_2014_05	2014	5	9	1899-12-31 10:40:00	15.982	124.223	6	10	0.0261			5.647			8.053
Benham_2014_05	2014	5	9	1899-12-31 10:40:00	15.982	124.223	6	20	0.0234	2.6906	0.1854	5.7399	2275.96	1957.07	8.085
Benham_2014_05	2014	5	9	1899-12-31 10:40:00	15.982	124.223	6	60	0.0581	4.1997	0.291	5.8962	2282.28	1960.3	8.075
Benham_2014_05	2014	5	9	1899-12-31 10:40:00	15.982	124.223	6	100	0.0481	8.4854		6.0329		1966.09	8.08
Benham_2014_05	2014	5	9	1899-12-31 10:40:00	15.982	124.223	6	140	0.0357	2.9924	0.327	6.0574	2288.98	1970.7	8.076
Benham_2014_05	2014	5	9	1899-12-31 10:40:00	15.982	124.223	6	160	0.0546	3.0528	0.5921	5.9694	2288.06	1977.08	8.051
Benham_2014_05	2014	5	9	1899-12-31 10:40:00	15.982	124.223	6	190	0.1003	4.0789	0.2434	5.5103	2293.71	2010.51	8.02
Benham_2014_05	2014	5	9	1899-12-31 10:40:00	15.982	124.223	6	200	0.1163	3.8375	0.2722	5.3588	2293.04	2015.34	7.991
Benham_2014_05	2014	5	9	1899-12-31 10:40:00	15.982	124.223	6	250	0.1625	4.8636	0.9264	5.2856	2293.16	2038.62	7.961
Benham_2014_05	2014	5	9	1899-12-31 10:40:00	15.982	124.223	6	300	0.2022	4.3807	2.6641	5.3442	2289.22	2046.33	7.958
Benham_2014_05	2014	5	9	1899-12-31 14:00:00	16.099	124.357	7	10	0.1146	1.5695		5.8717	2265.82	1939.16	8.14
Benham_2014_05	2014	5	9	1899-12-31 14:00:00	16.099	124.357	7	20	0.0911	2.1845		5.8913	2264.85	1939.48	8.158
Benham_2014_05	2014	5	9	1899-12-31 14:00:00	16.099	124.357	7	60	0.0507	1.0229		5.9987	2285.19	1959.41	8.122
Benham_2014_05	2014	5	9	1899-12-31 14:00:00	16.099	124.357	7	100		1.6378		6.028	2284.97	1956.29	8.148
Benham_2014_05	2014	5	9	1899-12-31 14:00:00	16.099	124.357	7	140	0.0822	5.3961		6.0036	2288.07	1964.19	8.136
Benham_2014_05	2014	5	9	1899-12-31 14:00:00	16.099	124.357	7	160	0.0704	3.2095		6.0085	2290.91	1961.75	8.136
Benham_2014_05	2014	5	9	1899-12-31 14:00:00	16.099	124.357	7	180	0.1061	1.9112		5.8864	2289.72	1968.92	8.126
Benham_2014_05	2014	5	9	1899-12-31 14:00:00	16.099	124.357	7	210	0.1012	1.9795		5.5005			8.03
Benham_2014_05	2014	5	9	1899-12-31 14:00:00	16.099	124.357	7	250	0.2021	1.9795		5.2221	2292.3	2030.26	8.019
Benham_2014_05	2014	5	9	1899-12-31 10:40:00	16.099	124.357	7	300	0.2355	6.6944		5.3637	2292.59	2042.85	8.034
Benham_2014_05	2014	5	9	1899-12-31 17:00:00	16.223	124.507	8	10	0.1069	1.1595		5.7936	2249.97	1930.08	8.097
Benham_2014_05	2014	5	9	1899-12-31 17:00:00	16.223	124.507	8	20	0.0686	0.6812		5.7936	2248.39	1926.96	8.095
Benham_2014_05	2014	5	9	1899-12-31 17:00:00	16.223	124.507	8	60	0.1345	6.421		5.9841	2287.33	1961.43	8.086
Benham_2014_05	2014	5	9	1899-12-31 17:00:00	16.223	124.507	8	100	0.0971	1.8428		6.0525	2288.11	1959.7	8.092
Benham_2014_05	2014	5	9	1899-12-31 17:00:00	16.223	124.507	8	140	0.0961	3.6878		5.989	2286.27	1969.09	8.084
Benham_2014_05	2014	5	9	1899-12-31 17:00:00	16.223	124.507	8	160	0.14	2.5945		5.9059	2284.68	1966.02	8.075
Benham_2014_05	2014	5	9	1899-12-31 17:00:00	16.223	124.507	8	180	0.11	0.8862		5.8571	2288.2	1986.21	8.05
Benham_2014_05	2014	5	9	1899-12-31 17:00:00	16.223	124.507	8	200	0.1458	1.8428		5.7399	2291.51	1996.45	8.045
Benham_2014_05	2014	5	9	1899-12-31 17:00:00	16.223	124.507	8	250	0.2399	2.3211		5.2123	2296.28	2052.08	7.946
Benham_2014_05	2014	5	9	1899-12-31 17:00:00	16.223	124.507	8	300	0.2583	5.3277		5.3393	2285.75	2052.96	7.937
Benham_2014_05	2014	5	10	1899-12-31 23:15:00	15.345	124.033	10	10	0.0429	1.8149	0.889	5.7105	2295.85		8.103
Benham_2014_05	2014	5	10	1899-12-31 23:15:00	15.345	124.033	10	20	0.087	2.2496	0.5035	5.7594	2246.94	1931.37	8.106
Benham_2014_05	2014	5	10	1899-12-31 23:15:00	15.345	124.033	10	60	0.045	3.4451		5.9597	2280.29	1962.68	8.091
Benham_2014_05	2014	5	10	1899-12-31 23:15:00	15.345	124.033	10	100	0.0542	1.8692		6.0329			8.095
Benham_2014_05	2014	5	10	1899-12-31 23:15:00	15.345	124.033	10	140	0.0455	3.3364		6.0183	2287.05	1969.79	8.079
Benham_2014_05	2014	5	10	1899-12-31 23:15:00	15.345	124.033	10	160	0.0847	0.239		5.9255	2290.11	1981.44	8.076
Benham_2014_05	2014	5	10	1899-12-31 23:15:00	15.345	124.033	10	180	0.0745	3.1734	1.3735	5.7789	2288.49	1987.6	8.066
Benham_2014_05	2014	5	10	1899-12-31 23:15:00	15.345	124.033	10	210	0.0748	6.4882	2.2191	5.7203	2296.88	1987.28	8.079
Benham_2014_05	2014	5	10	1899-12-31 23:15:00	15.345	124.033	10	250	0.1839	3.6625	3.3109	5.2221	2295.4	2054.03	7.963
Benham_2014_05	2014	5	10	1899-12-31 23:15:00	15.345	124.033	10	300	0.2093	4.3146	2.8274	5.5445	2276.54	2052.62	7.916
Benham_2014_05	2014	5	11	1899-12-31 04:00:00	15.468	124.189	11	10	0.0677	6.1622	0.1177	5.7154	2237.96	1921.1	8.11
Benham_2014_05	2014	5	11	1899-12-31 04:00:00	15.468	124.189	11	20	0.0194	2.5757	0.6742	5.7008	2240.11	1924.74	8.109
Benham_2014_05	2014	5	11	1899-12-31 04:00:00	15.468	124.189	11	60	0.0729	3.4451	0.2305	5.9352	2278.99	1956.6	8.11
Benham_2014_05	2014	5	11	1899-12-31 04:00:00	15.468	124.189	11	100	0.0247	1.2171	0.9662	6.0476	2281.62	1964.25	8.098
Benham_2014_05	2014	5	11	1899-12-31 04:00:00	15.468	124.189	11	140	0.0332	3.6625		6.0525	2288.08	1968.3	8.092
Benham_2014_05	2014	5	11	1899-12-31 04:00:00	15.468	124.189	11	160	0.0432			5.9206	2293.55	1980.75	8.072
Benham_2014_05	2014	5	11	1899-12-31 04:00:00	15.468	124.189	11	180	0.0609	3.0104	1.2965	5.5738	2292.44	1996.82	8.051
Benham_2014_05	2014	5	11	1899-12-31 04:00:00	15.468	124.189	11	210	0.0622	1.7605		5.3442	2291.33	2006.15	8.036
Benham_2014_05	2014	5	11	1899-12-31 04:00:00	15.468	124.189	11	250	0.19	4.9667	1.8667	5.1586	2289.21	2043.89	7.967
Benham_2014_05	2014	5	11	1899-12-31 04:00:00	15.468	124.189	11	300	0.1793	2.2496	4.775	5.2465	2296.7	2058.72	7.954
Benham_2014_05	2014	5	11	1899-12-31 07:24:00	15.578	124.372	12	10	0.028	2.1409	1.8068	5.6226	2256.78	1946.48	8.088
Benham_2014_05	2014	5	11	1899-12-31 07:24:00	15.578	124.372	12	20	0.0152	2.7387	1.6094	5.6764	2259.83	1946.19	8.093
Benham_2014_05	2014	5	11	1899-12-31 07:24:00	15.578	124.372	12	60	0.0412	2.5757	1.6947	5.9597		1988.86	8.082
Benham_2014_05	2014	5	11	1899-12-31 07:24:00	15.578	124.372	12	100	0.0575	3.7712	1.4304	6.1404	2291.43	1971.89	8.091
Benham_2014_05	2014	5	11	1899-12-31 07:24:00	15.578	124.372	12	140	0.0363	3.8255	1.4466	6.0183	2287.43	1970.44	8.098
Benham_2014_05	2014	5	11	1899-12-31 07:24:00	15.578	124.372	12	160	0.0947	0.5107		5.8864	2287.69	1975.47	8.081
Benham_2014_05	2014	5	11	1899-12-31 07:24:00	15.578	124.372	12	180	0.0603	2.6843	1.0779	5.6519	2293.91	1994.1	8.06
Benham_2014_05	2014	5	11	1899-12-31 07:24:00	15.578	124.372	12	215	0.1132	1.8149	1.578	5.227	2297.98	2034.19	7.997
Benham_2014_05	2014	5	11	1899-12-31 07:24:00	15.578	124.372	12	250	0.2187	3.8798	2.0978	5.1683	2297.93	2046.52	7.972
Benham_2014_05	2014	5	11	1899-12-31 07:24:00	15.578	124.372	12	300	0.2092	2.9017		5.3588	2282.37	2043.99	7.944
Benham_2014_05	2014	5	11	1899-12-31 23:53:00	15.684	124.516	13	10	0.0698	2.7015	0.1787	5.6128	2254.73	1933.93	8.135
Benham_2014_05	2014	5	11	1899-12-31 23:53:00	15.684	124.516	13	20	0.0624	8.3234	1.214	5.6764	2258.22	1952.11	8.107
Benham_2014_05	2014	5	11	1899-12-31 23:53:00	15.684	124.516	13	60	0.047	4.536		5.9255	2283.48	1978.68	8.075
Benham_2014_05	2014	5	11	1899-12-31 23:53:00	15.684	124.516	13	100	0.0292	3.2933		5.989	2288.31	1981.34	8.085
Benham_2014_05	2014	5	11	1899-12-31 23:53:00	15.684	124.516	13	140	0.0668	1.6955		5.9157	2284	1979.68	8.092
Benham_2014_05	2014	5	11	1899-12-31 23:53:00	15.684	124.516	13	160	0.0417	3.7667	0.209	5.7008	2293.88		8.023
Benham_2014_05	2014	5	11	1899-12-31 23:53:00	15.684	124.516	13	180	0.0675	2.1689	0.3366	5.3735	2284.24	1984.6	8.068
Benham_2014_05	2014	5	11	1899-12-31 23:53:00	15.684	124.516	13	195	0.1116	2.8199	0.7489	5.1195	2294.76	2028.94	8.014
Benham_2014_05	2014	5	11	1899-12-31 23:53:00	15.684	124.516	13	250	0.1813	5.0095	1.5795	5.2367	2284.88	2035.07	7.98
Benham_2014_05	2014	5	11	1899-12-31 23:53:00	15.684	124.516	13	300	0.226	5.6604	2.7772	5.3295	2290.08	2044.13	7.984
Benham_2014_05	2014	5	11	1899-12-31 16:04:00	15.809	124.68	14	10	0.0335	6.5481	1.0339	5.6568	2268.42	1947.93	8.086
Benham_2014_05	2014	5	11	1899-12-31 16:04:00	15.809	124.68	14	20	0.0457	6.7848		5.735	2288.59	1968.33	8.072
Benham_2014_05	2014	5	11	1899-12-31 16:04:00	15.809	124.68	14	60	0.0826	2.9383	0.0183	5.9352	2285.3	1966.6	8.07
Benham_2014_05	2014	5	11	1899-12-31 16:04:00	15.809	124.68	14	100	0.0339	4.1218		5.8375	2292.31	1975.41	8.054
Benham_2014_05	2014	5	11	1899-12-31 16:04:00	15.809	124.68	14	140	0.0714	4.0035	0.4513	5.3002	2296.8	2016.12	7.991
Benham_2014_05	2014	5	11	1899-12-31 16:04:00	15.809	124.68	14	150	0.1768	5.1278	0.5359	5.1195	2299.42	2022.72	7.98
Benham_2014_05	2014	5	11	1899-12-31 16:04:00	15.809	124.68	14	180		4.7136	1.059	5.1586	2295.04	2040.04	7.953
Benham_2014_05	2014	5	11	1899-12-31 16:04:00	15.809	124.68	14	200	0.2646	3.4709		4.8997		2071.7	7.938
Benham_2014_05	2014	5	11	1899-12-31 16:04:00	15.809	124.68	14	250	0.3627	6.7256	4.998	5.183	2287.35	2078.24	7.878
Benham_2014_05	2014	5	11	1899-12-31 16:04:00	15.809	124.68	14	300	0.4709	12.7618	6.455	5.3149	2276.79	2092.45	7.844
Benham_2014_05	2014	5	11	1899-12-31 19:50:00	15.9	124.83	15	10	0.0295	1.2813		5.6568	2261.72	1939.21	8.06
Benham_2014_05	2014	5	11	1899-12-31 19:50:00	15.9	124.83	15	20		2.5832		5.735	2258.07	1937.24	8.073
Benham_2014_05	2014	5	11	1899-12-31 19:50:00	15.9	124.83	15	60		3.5892		5.9352	2290.19	1971.36	8.044
Benham_2014_05	2014	5	11	1899-12-31 19:50:00	15.9	124.83	15	100	0.024	7.199	1.3711	5.8375	2290.45	1980.36	8.03
Benham_2014_05	2014	5	11	1899-12-31 19:50:00	15.9	124.83	15	140	0.0532	4.4769		5.3002	2291.49	1997.14	8.014
Benham_2014_05	2014	5	11	1899-12-31 19:50:00	15.9	124.83	15	150	0.0561	2.3465	0.4993	5.1195	2301.87	2018.06	8.001
Benham_2014_05	2014	5	11	1899-12-31 19:50:00	15.9	124.83	15	180	0.2143	3.53	0.6141		2303.08	2056.68	7.926
Benham_2014_05	2014	5	11	1899-12-31 19:50:00	15.9	124.83	15	200	0.2232	4.181	1.2603	4.8997	2302.07	2060.32	7.943
Benham_2014_05	2014	5	11	1899-12-31 19:50:00	15.9	124.83	15	250	0.2906	6.1338	5.3378	5.183	2280.23	2092.15	7.756
Benham_2014_05	2014	5	11	1899-12-31 19:50:00	15.9	124.83	15	300	0.4346	9.2111		5.3149	2271.94	2119.81	7.678
Benham_2014_05	2014	5	13	1899-12-31 00:32:00	16.12	123.38	16	10	0.0443	2.2284			2283.22	1961.18	8.045
Benham_2014_05	2014	5	13	1899-12-31 00:32:00	16.12	123.38	16	20	0.0886	2.1773	0.5833		2297.24	1974.96	8.032
Benham_2014_05	2014	5	13	1899-12-31 00:32:00	16.12	123.38	16	60	0.07	1.3089			2291.83	1969.95	8.032
Benham_2014_05	2014	5	13	1899-12-31 00:32:00	16.12	123.38	16	100		3.9651			2294.26	1996.92	8.006
Benham_2014_05	2014	5	13	1899-12-31 00:32:00	16.12	123.38	16	128	0.0848	2.4838	0.8689		2301.08	2029.78	7.961
Benham_2014_05	2014	5	13	1899-12-31 00:32:00	16.12	123.38	16	160	0.1691	3.5565	1.3857		2298.15	2050.94	7.927
Benham_2014_05	2014	5	13	1899-12-31 00:32:00	16.12	123.38	16	180	0.2324	3.5565	1.5517		2300.85	2061.63	7.927
Benham_2014_05	2014	5	13	1899-12-31 00:32:00	16.12	123.38	16	200	0.2306	4.8335			2291.87	2064.95	7.88
Benham_2014_05	2014	5	13	1899-12-31 00:32:00	16.12	123.38	16	250	0.3323	7.7962	5.1137		2286.14	2072.38	7.853
Benham_2014_05	2014	5	13	1899-12-31 00:32:00	16.12	123.38	16	300	0.5526	11.1164	5.9096		2277.76	2097.39	7.812
Benham_2014_05	2014	5	13	1899-12-31 04:07:00	16.232	123.519	17	10	0.0655	6.4681		5.5396	2280.07	1962.88	8.064
Benham_2014_05	2014	5	13	1899-12-31 04:07:00	16.232	123.519	17	20	0.0402	5.0378		5.6275	2287	1968.24	8.064
Benham_2014_05	2014	5	13	1899-12-31 04:07:00	16.232	123.519	17	60		5.0378		5.8913	2294.01	1968.48	8.071
Benham_2014_05	2014	5	13	1899-12-31 04:07:00	16.232	123.519	17	100	0.0614	2.5859		5.6226	2323.56	2022.71	8.037
Benham_2014_05	2014	5	13	1899-12-31 04:07:00	16.232	123.519	17	140	0.131	2.5348		5.0511	2297.91	2030.62	7.973
Benham_2014_05	2014	5	13	1899-12-31 04:07:00	16.232	123.519	17	160		2.3305		4.9974	2298.73	2040.93	7.945
Benham_2014_05	2014	5	13	1899-12-31 04:07:00	16.232	123.519	17	180	0.1711	5.6	1.9016	5.393	2294.16	2048.79	7.926
Benham_2014_05	2014	5	13	1899-12-31 04:07:00	16.232	123.519	17	200	0.1948	4.7824		5.2025	2290.3	2050.94	7.942
Benham_2014_05	2014	5	13	1899-12-31 04:07:00	16.232	123.519	17	250	0.2568	9.0221	4.561	5.393	2289.55	2062.5	7.895
Benham_2014_05	2014	5	13	1899-12-31 04:07:00	16.232	123.519	17	300	0.5002	10.4013		5.2318	2278.02	2089.1	7.836
Benham_2014_05	2014	5	13	1899-12-31 07:52:00	16.334	123.675	18	10		3.6586	0.0494	5.6031	2271.81	1948.69	8.079
Benham_2014_05	2014	5	13	1899-12-31 07:52:00	16.334	123.675	18	20		2.3305		5.6666	2288.46	1963.02	8.083
Benham_2014_05	2014	5	13	1899-12-31 07:52:00	16.334	123.675	18	60		1.7176		5.9548	2295.98	1972.07	8.089
Benham_2014_05	2014	5	13	1899-12-31 07:52:00	16.334	123.675	18	100		1.2578	0.188	5.8229	2291.78	1978.72	8.065
Benham_2014_05	2014	5	13	1899-12-31 07:52:00	16.334	123.675	18	140		3.9651	0.6366	5.2318	2298.07	2017.07	7.998
Benham_2014_05	2014	5	13	1899-12-31 07:52:00	16.334	123.675	18	160		7.9494	1.2051	5.1879	2298.65	2044.41	7.958
Benham_2014_05	2014	5	13	1899-12-31 07:52:00	16.334	123.675	18	180		5.9062		5.227	2294.82	2051.3	7.947
Benham_2014_05	2014	5	13	1899-12-31 07:52:00	16.334	123.675	18	200		4.0673	1.6303	5.2758	2293.74	2061.12	7.905
Benham_2014_05	2014	5	13	1899-12-31 07:52:00	16.334	123.675	18	250		5.7019	3.7911	5.4126	2291.66	2071.34	7.887
Benham_2014_05	2014	5	13	1899-12-31 07:52:00	16.334	123.675	18	300		6.9278	4.3133	5.4663	2280.64	2078.84	7.843
Benham_2014_05	2014	5	13	1899-12-31 23:39:00	16.464	123.798	19	10	0.031	1.973		5.6666	2284.06	1968.19	8.076
Benham_2014_05	2014	5	13	1899-12-31 23:39:00	16.464	123.798	19	20		2.2794	0.2027		2279.99	1966.61	8.06
Benham_2014_05	2014	5	13	1899-12-31 23:39:00	16.464	123.798	19	60	0.0523	2.6881		5.8864	2286.43	1975.17	8.068
Benham_2014_05	2014	5	13	1899-12-31 23:39:00	16.464	123.798	19	100		9.0732		5.8864	2287.72	1981.06	8.046
Benham_2014_05	2014	5	13	1899-12-31 23:39:00	16.464	123.798	19	140	0.0906	2.8924	0.2479	5.4175	2289.09	2016.41	7.984
Benham_2014_05	2014	5	13	1899-12-31 23:39:00	16.464	123.798	19	160		3.5054	0.36	5.0511	2296.22	2027.99	7.99
Benham_2014_05	2014	5	13	1899-12-31 23:39:00	16.464	123.798	19	180		4.6292	1.6875	5.056	2293.28	2043.69	7.945
Benham_2014_05	2014	5	13	1899-12-31 23:39:00	16.464	123.798	19	200		3.7097	1.7949	4.8801	2296.27	2059.23	7.924
Benham_2014_05	2014	5	13	1899-12-31 23:39:00	16.464	123.798	19	250		4.8846	4.7119	5.5591	2281.36	2055.52	7.9
Benham_2014_05	2014	5	13	1899-12-31 23:39:00	16.464	123.798	19	300		7.8983	6.4619	5.4663	2273.6	2066.99	7.9
Benham_2014_05	2014	5	13	1899-12-31 03:52:00	16.576	124.002	20	10		1.7686		5.6373	2248.45	1937.64	8.09
Benham_2014_05	2014	5	13	1899-12-31 03:52:00	16.576	124.002	20	20	0.0239	2.2794		5.7301	2248.7	1941.68	8.076
Benham_2014_05	2014	5	13	1899-12-31 03:52:00	16.576	124.002	20	60		2.0751		5.9645	2282.28	1968.29	8.078
Benham_2014_05	2014	5	13	1899-12-31 03:52:00	16.576	124.002	20	100	0.0103	3.5054		6.0867	2298.62	1987.18	8.067
Benham_2014_05	2014	5	13	1899-12-31 03:52:00	16.576	124.002	20	140		1.6665		5.8229	2289.86	1993.42	8.049
Benham_2014_05	2014	5	13	1899-12-31 03:52:00	16.576	124.002	20	160	0.0434	3.5054	0.2705	5.3393	2290.48	2019.57	8.004
Benham_2014_05	2014	5	13	1899-12-31 03:52:00	16.576	124.002	20	180		3.6075	1.2094	5.0413	2297.97	2060.75	7.937
Benham_2014_05	2014	5	13	1899-12-31 03:52:00	16.576	124.002	20	200		3.0457	1.9132	5.1195	2294.57	2058.82	7.92
Benham_2014_05	2014	5	13	1899-12-31 03:52:00	16.576	124.002	20	250	0.2038	8.4602	4.6298	5.6617	2284.91	2059.61	7.909
Benham_2014_05	2014	5	13	1899-12-31 03:52:00	16.576	124.002	20	300	0.3691	1.5643	3.2523	5.6861	2275.36	2069.45	7.868
Benham_2014_05	2014	5	13	1899-12-31 07:48:00	15.49	124.123	21	10	0.0545	3.6586	0.3114	5.7985	2258.85	1942.57	8.026
Benham_2014_05	2014	5	13	1899-12-31 07:48:00	15.49	124.123	21	20	0.0509	2.6881		5.9108	2271.44	1951.2	8.03
Benham_2014_05	2014	5	13	1899-12-31 07:48:00	15.49	124.123	21	60	0.0278	2.5348			2275.56	1962.65	8.032
Benham_2014_05	2014	5	13	1899-12-31 07:48:00	15.49	124.123	21	100	0.0745	2.1262	0.1748	5.9792	2287.77	1978.03	8.008
Benham_2014_05	2014	5	13	1899-12-31 07:48:00	15.49	124.123	21	140	0.0682	4.0162	0.214	5.6812	2289.8	2001.5	7.925
Benham_2014_05	2014	5	13	1899-12-31 07:48:00	15.49	124.123	21	150	0.0608	3.7097	0.2091	5.3735	2295.09	2025.71	7.91
Benham_2014_05	2014	5	13	1899-12-31 07:48:00	15.49	124.123	21	180	0.1619	3.0967	1.4129	5.1537	2305.72	2063.1	7.874
Benham_2014_05	2014	5	13	1899-12-31 07:48:00	15.49	124.123	21	200	0.1984	3.7608	2.2785	5.3393	2287.21	2053.86	7.851
Benham_2014_05	2014	5	13	1899-12-31 07:48:00	15.49	124.123	21	250	0.243	4.1694	4.0238	5.8034	2277.21	2049.68	7.914
Benham_2014_05	2014	5	13	1899-12-31 07:48:00	16.691	124.179	21	300	0.4054	6.6213	4.0941	5.5933	2275.57	2062.67	7.891
Benham_2014_05	2014	5	15	1899-12-31 09:55:00	15.223	124.014	23	10		4.3934		5.608	2270.37	1950.62	8.067
Benham_2014_05	2014	5	15	1899-12-31 09:55:00	15.223	124.014	23	100		2.0468		5.9401	2301.03	1983.15	8.059
Benham_2014_05	2014	5	15	1899-12-31 09:55:00	15.223	124.014	23	140		2.7401		5.266	2302.28	2018.85	8.007
Benham_2014_05	2014	5	15	1899-12-31 09:55:00	15.223	124.014	23	200		5.8867	2.2006	5.1488	2302.29	2067.39	7.921
Benham_2014_05	2014	5	15	1899-12-31 09:55:00	15.223	124.014	23	300		6.5267	4.6123	5.3393	2276.56	2072.09	7.872
Benham_2014_05	2014	5	15	1899-12-31 09:55:00	15.223	124.014	23	400		26.0894	8.7407	4.5626	2277.39	2154.56	7.682
Benham_2014_05	2014	5	15	1899-12-31 09:55:00	15.223	124.014	23	500		52.0447	17.8822	3.7225	2297.56	2256.1	7.312
Benham_2014_05	2014	5	15	1899-12-31 09:55:00	15.223	124.014	23	600		72.6667	18.0107	2.3596	2309.2	2287.78	7.261
Benham_2014_05	2014	5	15	1899-12-31 09:55:00	15.223	124.014	23	750
Benham_2014_05	2014	5	15	1899-12-31 09:55:00	15.223	124.014	23	1000		112.2	18.1653	2.3499	2362.92	2320.7	7.455
Benham_2014_05	2014	5	15	1899-12-31 18:35:00	14.974	123.926	25	100	0.2205		0.0379	5.9352	2287.16	1967.61	8.106
Benham_2014_05	2014	5	15	1899-12-31 18:35:00	14.974	123.926	25	130	0.1811	5.1934	0.1669	5.3051	2296.37	2014.85	8.033
Benham_2014_05	2014	5	15	1899-12-31 18:35:00	14.974	123.926	25	200	0.3218	5.7267	2.6281	5.4419	2285.4	2047.59	7.955
Benham_2014_05	2014	5	15	1899-12-31 18:35:00	14.974	123.926	25	300	0.6835	12.7133	7.5298	5.0365	2273.14	2097.76	7.846
Benham_2014_05	2014	5	15	1899-12-31 18:35:00	14.974	123.926	25	400	1.0476	33.2005	10.9029	3.7616	2275.17	2176	7.691
Benham_2014_05	2014	5	15	1899-12-31 18:35:00	14.974	123.926	25	500	1.5104	57.0224	20.0043	2.726	2297.36	2231.36	7.584
Benham_2014_05	2014	5	15	1899-12-31 18:35:00	14.974	123.926	25	600	1.6869	74.4445	24.1779	2.2766	2318.9	2270.52	7.549
Benham_2014_05	2014	5	15	1899-12-31 18:35:00	14.974	123.926	25	750	1.8185	93.2887	25.643	2.1252	2332.34	2290.48	7.521
Benham_2014_05	2014	5	15	1899-12-31 18:35:00	14.974	123.926	25	1000	1.9185	104.2	23.4916	2.2473	2354.94	2302.28	7.563
Benham_2014_06	2014	5	15	1899-12-31 19:35:00	14.974	123.926	25
Benham_2014_05	2014	5	15	1899-12-31 20:46:00	14.729	123.833	26	10		2.8468		5.8131	2257.22	1932.54	8.135
Benham_2014_05	2014	5	15	1899-12-31 20:46:00	14.729	123.833	26	20		3.4867		5.901	2263.45	1939.76	8.139
Benham_2014_05	2014	5	15	1899-12-31 20:46:00	14.729	123.833	26	60		2.0468	0.3243	5.9157	2284.77	1962.08	8.136
Benham_2014_05	2014	5	15	1899-12-31 20:46:00	14.729	123.833	26	90		5.5667		5.4517	2294.64	2012.13	8.067
Benham_2014_05	2014	5	15	1899-12-31 20:46:00	14.729	123.833	26	140		4.6601	0.8167	5.2807	2287.63	2048.74	7.997
Benham_2014_05	2014	5	15	1899-12-31 20:46:00	14.729	123.833	26	160	0.1311	5.4067		5.2856	2289.38	2050.91	7.993
Benham_2014_05	2014	5	15	1899-12-31 20:46:00	14.729	123.833	26	180	0.3333	5.0334	1.5955	5.3588	2284.93	2057.61	7.946
Benham_2014_05	2014	5	15	1899-12-31 20:46:00	14.729	123.833	26	200	0.3841	10.4733	4.0172	5.4419	2282.97	2055.67	7.955
Benham_2014_05	2014	5	15	1899-12-31 20:46:00	14.729	123.833	26	250		12.34		5.4517	2276.68	2066.8	7.913
Benham_2014_05	2014	5	15	1899-12-31 18:35:00	14.729	123.833	26	300	0.4208	14.26	7.2334	5.0267	2288.55	2108.65
